# Supplementary material for: Identification of unique highly hetero-substituted benzenes as chemical weapons of springtails by a combination of trace analytical methods with DFT calculations and synthesis
Source: Chem Sci. 2024 Sep 2;15(37):15332–8. doi: 10.1039/d4sc03182b (PMC11376146; doi:10.1039/d4sc03182b)
Supplement: SC-015-D4SC03182B-s002 [file SC-015-D4SC03182B-s002.xlsx]

## Sheet: A
wavenumber	Absorption
700	-0.20596
701.93	-0.227268
703.86	-0.238847
705.789	-0.242791
707.719	-0.245103
709.649	-0.246031
711.579	-0.245059
713.509	-0.245061
715.439	-0.24441
717.368	-0.242096
719.298	-0.240611
721.228	-0.240175
723.158	-0.240747
725.088	-0.241495
727.018	-0.24071
728.947	-0.239874
730.877	-0.23954
732.807	-0.23976
734.737	-0.241635
736.667	-0.244064
738.596	-0.246377
740.526	-0.24814
742.456	-0.248474
744.386	-0.247257
746.316	-0.244711
748.246	-0.241045
750.175	-0.235394
752.105	-0.230411
754.035	-0.232165
755.965	-0.239365
757.895	-0.244981
759.825	-0.246867
761.754	-0.246612
763.684	-0.246037
765.614	-0.245504
767.544	-0.241886
769.474	-0.234255
771.404	-0.223251
773.333	-0.20697
775.263	-0.184943
777.193	-0.158618
779.123	-0.129672
781.053	-0.102265
782.982	-0.080976
784.912	-0.066957
786.842	-0.060057
788.772	-0.060039
790.702	-0.066874
792.632	-0.080198
794.561	-0.09668
796.491	-0.112679
798.421	-0.129845
800.351	-0.148429
802.281	-0.165741
804.211	-0.181355
806.14	-0.19651
808.07	-0.211024
810	-0.220169
811.93	-0.225182
813.86	-0.231425
815.789	-0.237257
817.719	-0.240262
819.649	-0.242553
821.579	-0.245442
823.509	-0.248354
825.439	-0.249598
827.368	-0.248462
829.298	-0.248509
831.228	-0.24983
833.158	-0.249887
835.088	-0.250209
837.018	-0.250921
838.947	-0.251223
840.877	-0.251392
842.807	-0.2516
844.737	-0.252952
846.667	-0.253875
848.596	-0.252832
850.526	-0.252068
852.456	-0.252325
854.386	-0.252742
856.316	-0.252533
858.246	-0.251383
860.175	-0.250626
862.105	-0.251035
864.035	-0.252222
865.965	-0.252557
867.895	-0.251064
869.825	-0.249971
871.754	-0.250367
873.684	-0.249648
875.614	-0.246285
877.544	-0.240466
879.474	-0.230218
881.404	-0.210075
883.333	-0.167419
885.263	-0.086105
887.193	0.013729
889.123	0.05716
891.053	0.001511
892.982	-0.099642
894.912	-0.174948
896.842	-0.209762
898.772	-0.2231
900.702	-0.228224
902.632	-0.230544
904.561	-0.232507
906.491	-0.233947
908.421	-0.235135
910.351	-0.236385
912.281	-0.236568
914.211	-0.235422
916.14	-0.233824
918.07	-0.23077
920	-0.224496
921.93	-0.213944
923.86	-0.197108
925.789	-0.173317
927.719	-0.14332
929.649	-0.108757
931.579	-0.075926
933.509	-0.05288
935.439	-0.045147
937.368	-0.054143
939.298	-0.078046
941.228	-0.110426
943.158	-0.143344
945.088	-0.172614
947.018	-0.193615
948.947	-0.203985
950.877	-0.206757
952.807	-0.204691
954.737	-0.198789
956.667	-0.192262
958.596	-0.187807
960.526	-0.181909
962.456	-0.169961
964.386	-0.150407
966.316	-0.123718
968.246	-0.093256
970.175	-0.062645
972.105	-0.032289
974.035	-0.002552
975.965	0.020948
977.895	0.026196
979.825	-0.000634
981.754	-0.057816
983.684	-0.123013
985.614	-0.174185
987.544	-0.204429
989.474	-0.219345
991.404	-0.226566
993.333	-0.230832
995.263	-0.233234
997.193	-0.23422
999.123	-0.235247
1001.05	-0.235199
1002.98	-0.233452
1004.91	-0.231929
1006.84	-0.230578
1008.77	-0.227109
1010.7	-0.22195
1012.63	-0.215208
1014.56	-0.205401
1016.49	-0.192888
1018.42	-0.176524
1020.35	-0.15162
1022.28	-0.103907
1024.21	-0.007356
1026.14	0.155137
1028.07	0.364531
1030	0.565515
1031.93	0.693991
1033.86	0.709646
1035.79	0.613182
1037.72	0.441234
1039.65	0.248275
1041.58	0.083704
1043.51	-0.027216
1045.44	-0.088362
1047.37	-0.118114
1049.3	-0.131466
1051.23	-0.134119
1053.16	-0.125615
1055.09	-0.101108
1057.02	-0.047106
1058.95	0.049784
1060.88	0.18781
1062.81	0.34303
1064.74	0.477891
1066.67	0.563186
1068.6	0.585108
1070.53	0.544687
1072.46	0.455256
1074.39	0.336557
1076.32	0.208778
1078.25	0.0891
1080.18	-0.009005
1082.11	-0.080153
1084.04	-0.126529
1085.96	-0.154497
1087.89	-0.171714
1089.82	-0.183344
1091.75	-0.191442
1093.68	-0.196828
1095.61	-0.201992
1097.54	-0.206998
1099.47	-0.208859
1101.4	-0.208283
1103.33	-0.206074
1105.26	-0.201332
1107.19	-0.194548
1109.12	-0.185863
1111.05	-0.17559
1112.98	-0.16774
1114.91	-0.166479
1116.84	-0.171203
1118.77	-0.178086
1120.7	-0.183127
1122.63	-0.185949
1124.56	-0.186318
1126.49	-0.185019
1128.42	-0.184678
1130.35	-0.185366
1132.28	-0.18908
1134.21	-0.196633
1136.14	-0.20622
1138.07	-0.216238
1140	-0.224605
1141.93	-0.230826
1143.86	-0.234264
1145.79	-0.235626
1147.72	-0.236556
1149.65	-0.236506
1151.58	-0.235316
1153.51	-0.23372
1155.44	-0.233481
1157.37	-0.233789
1159.3	-0.232512
1161.23	-0.231265
1163.16	-0.231423
1165.09	-0.23329
1167.02	-0.236126
1168.95	-0.238685
1170.88	-0.241303
1172.81	-0.243615
1174.74	-0.245536
1176.67	-0.247279
1178.6	-0.247899
1180.53	-0.248144
1182.46	-0.248019
1184.39	-0.245988
1186.32	-0.242893
1188.25	-0.240127
1190.18	-0.237153
1192.11	-0.230488
1194.04	-0.218262
1195.96	-0.202606
1197.89	-0.185935
1199.82	-0.169801
1201.75	-0.154617
1203.68	-0.14228
1205.61	-0.139235
1207.54	-0.148246
1209.47	-0.163743
1211.4	-0.178802
1213.33	-0.1892
1215.26	-0.195167
1217.19	-0.196351
1219.12	-0.1908
1221.05	-0.177687
1222.98	-0.151707
1224.91	-0.107698
1226.84	-0.051086
1228.77	0.003977
1230.7	0.044159
1232.63	0.064654
1234.56	0.06717
1236.49	0.055416
1238.42	0.037401
1240.35	0.022855
1242.28	0.015876
1244.21	0.017043
1246.14	0.033747
1248.07	0.084235
1250	0.18605
1251.93	0.333779
1253.86	0.478589
1255.79	0.551303
1257.72	0.523188
1259.65	0.418962
1261.58	0.280084
1263.51	0.141722
1265.44	0.02567
1267.37	-0.060433
1269.3	-0.117926
1271.23	-0.154034
1273.16	-0.177419
1275.09	-0.19284
1277.02	-0.203228
1278.95	-0.211328
1280.88	-0.217455
1282.81	-0.221934
1284.74	-0.226024
1286.67	-0.229417
1288.6	-0.231654
1290.53	-0.232806
1292.46	-0.233165
1294.39	-0.233621
1296.32	-0.234917
1298.25	-0.236987
1300.18	-0.23898
1302.11	-0.240185
1304.04	-0.240526
1305.96	-0.240276
1307.89	-0.239395
1309.82	-0.23824
1311.75	-0.237249
1313.68	-0.235896
1315.61	-0.233245
1317.54	-0.228488
1319.47	-0.22324
1321.4	-0.218895
1323.33	-0.213364
1325.26	-0.203447
1327.19	-0.187349
1329.12	-0.16707
1331.05	-0.146383
1332.98	-0.126477
1334.91	-0.106213
1336.84	-0.087668
1338.77	-0.080212
1340.7	-0.094747
1342.63	-0.129325
1344.56	-0.169672
1346.49	-0.20285
1348.42	-0.223554
1350.35	-0.234587
1352.28	-0.241104
1354.21	-0.245511
1356.14	-0.249043
1358.07	-0.251891
1360	-0.25348
1361.93	-0.254663
1363.86	-0.255604
1365.79	-0.256297
1367.72	-0.256774
1369.65	-0.256864
1371.58	-0.257662
1373.51	-0.25853
1375.44	-0.258402
1377.37	-0.258226
1379.3	-0.258135
1381.23	-0.258222
1383.16	-0.258372
1385.09	-0.257967
1387.02	-0.257219
1388.95	-0.256171
1390.88	-0.254334
1392.81	-0.251268
1394.74	-0.247499
1396.67	-0.243749
1398.6	-0.239359
1400.53	-0.235239
1402.46	-0.233136
1404.39	-0.232139
1406.32	-0.231104
1408.25	-0.228907
1410.18	-0.223614
1412.11	-0.214028
1414.04	-0.198342
1415.96	-0.173556
1417.89	-0.137187
1419.82	-0.084694
1421.75	-0.021413
1423.68	0.047812
1425.61	0.112155
1427.54	0.141933
1429.47	0.120179
1431.4	0.056902
1433.33	-0.003757
1435.26	-0.026358
1437.19	-0.016081
1439.12	-0.002568
1441.05	0.000205
1442.98	-0.000519
1444.91	0.007984
1446.84	0.036692
1448.77	0.085139
1450.7	0.14153
1452.63	0.207452
1454.56	0.29146
1456.49	0.406978
1458.42	0.537299
1460.35	0.611154
1462.28	0.603253
1464.21	0.528152
1466.14	0.467478
1468.07	0.511455
1470	0.620356
1471.93	0.665191
1473.86	0.562031
1475.79	0.365008
1477.72	0.168364
1479.65	0.027946
1481.58	-0.054762
1483.51	-0.102104
1485.44	-0.128544
1487.37	-0.143657
1489.3	-0.148776
1491.23	-0.142881
1493.16	-0.127805
1495.09	-0.108693
1497.02	-0.094642
1498.95	-0.098874
1500.88	-0.121197
1502.81	-0.15009
1504.74	-0.174754
1506.67	-0.194409
1508.6	-0.210466
1510.53	-0.221114
1512.46	-0.227295
1514.39	-0.231483
1516.32	-0.234435
1518.25	-0.236477
1520.18	-0.237137
1522.11	-0.237125
1524.04	-0.239033
1525.96	-0.241446
1527.89	-0.243254
1529.82	-0.245335
1531.75	-0.246712
1533.68	-0.246439
1535.61	-0.246823
1537.54	-0.247798
1539.47	-0.246683
1541.4	-0.245679
1543.33	-0.246999
1545.26	-0.248139
1547.19	-0.249062
1549.12	-0.25008
1551.05	-0.25068
1552.98	-0.250746
1554.91	-0.250028
1556.84	-0.249573
1558.77	-0.247839
1560.7	-0.246521
1562.63	-0.248014
1564.56	-0.24868
1566.49	-0.248119
1568.42	-0.246994
1570.35	-0.245286
1572.28	-0.244522
1574.21	-0.24407
1576.14	-0.241824
1578.07	-0.239008
1580	-0.237096
1581.93	-0.234413
1583.86	-0.23042
1585.79	-0.227369
1587.72	-0.227115
1589.65	-0.227676
1591.58	-0.227468
1593.51	-0.226343
1595.44	-0.224117
1597.37	-0.221282
1599.3	-0.217368
1601.23	-0.212042
1603.16	-0.205349
1605.09	-0.195836
1607.02	-0.181586
1608.95	-0.162446
1610.88	-0.138847
1612.81	-0.109406
1614.74	-0.078579
1616.67	-0.055267
1618.6	-0.055449
1620.53	-0.082647
1622.46	-0.121696
1624.39	-0.158648
1626.32	-0.185249
1628.25	-0.202722
1630.18	-0.214844
1632.11	-0.22426
1634.04	-0.231412
1635.96	-0.235827
1637.89	-0.240044
1639.82	-0.244264
1641.75	-0.246513
1643.68	-0.24851
1645.61	-0.25072
1647.54	-0.251525
1649.47	-0.253128
1651.4	-0.254455
1653.33	-0.252088
1655.26	-0.251642
1657.19	-0.254495
1659.12	-0.25612
1661.05	-0.256816
1662.98	-0.256924
1664.91	-0.257074
1666.84	-0.257535
1668.77	-0.256806
1670.7	-0.256285
1672.63	-0.257151
1674.56	-0.256584
1676.49	-0.255165
1678.42	-0.255286
1680.35	-0.255715
1682.28	-0.256228
1684.21	-0.255497
1686.14	-0.254532
1688.07	-0.256364
1690	-0.258072
1691.93	-0.259012
1693.86	-0.260078
1695.79	-0.258665
1697.72	-0.25679
1699.65	-0.256646
1701.58	-0.256178
1703.51	-0.256705
1705.44	-0.256591
1707.37	-0.254772
1709.3	-0.252321
1711.23	-0.248866
1713.16	-0.244033
1715.09	-0.23796
1717.02	-0.23128
1718.95	-0.225399
1720.88	-0.223707
1722.81	-0.224796
1724.74	-0.226735
1726.67	-0.231021
1728.6	-0.239329
1730.53	-0.252212
1732.46	-0.255641
1734.39	-0.257494
1736.32	-0.257464
1738.25	-0.253269
1740.18	-0.243205
1742.11	-0.242976
1744.04	-0.240252
1745.96	-0.23735
1747.89	-0.235911
1749.82	-0.235975
1751.75	-0.237217
1753.68	-0.240196
1755.61	-0.244705
1757.54	-0.248447
1759.47	-0.251911
1761.4	-0.251162
1763.33	-0.250319
1765.26	-0.250977
1767.19	-0.25121
1769.12	-0.249839
1771.05	-0.249556
1772.98	-0.249682
1774.91	-0.248839
1776.84	-0.248047
1778.77	-0.247374
1780.7	-0.246651
1782.63	-0.245984
1784.56	-0.24588
1786.49	-0.246237
1788.42	-0.246197
1790.35	-0.245562
1792.28	-0.245047
1794.21	-0.245602
1796.14	-0.246585
1798.07	-0.246184
1800	-0.245
1801.93	-0.245003
1803.86	-0.24525
1805.79	-0.244909
1807.72	-0.244614
1809.65	-0.244061
1811.58	-0.243374
1813.51	-0.24297
1815.44	-0.242682
1817.37	-0.242503
1819.3	-0.242185
1821.23	-0.241891
1823.16	-0.242074
1825.09	-0.242016
1827.02	-0.24247
1828.95	-0.243923
1830.88	-0.24505
1832.81	-0.246711
1834.74	-0.248505
1836.67	-0.249467
1838.6	-0.25011
1840.53	-0.249908
1842.46	-0.249925
1844.39	-0.250608
1846.32	-0.251336
1848.25	-0.251753
1850.18	-0.251336
1852.11	-0.250916
1854.04	-0.250677
1855.96	-0.250526
1857.89	-0.25076
1859.82	-0.251042
1861.75	-0.250808
1863.68	-0.250378
1865.61	-0.250189
1867.54	-0.250372
1869.47	-0.250819
1871.4	-0.251337
1873.33	-0.251787
1875.26	-0.251844
1877.19	-0.251673
1879.12	-0.251603
1881.05	-0.25174
1882.98	-0.251411
1884.91	-0.250584
1886.84	-0.250153
1888.77	-0.249968
1890.7	-0.249428
1892.63	-0.249427
1894.56	-0.250004
1896.49	-0.250366
1898.42	-0.250538
1900.35	-0.250342
1902.28	-0.250251
1904.21	-0.249932
1906.14	-0.249504
1908.07	-0.249472
1910	-0.249111
1911.93	-0.248685
1913.86	-0.2488
1915.79	-0.249624
1917.72	-0.25018
1919.65	-0.249684
1921.58	-0.24931
1923.51	-0.249634
1925.44	-0.250275
1927.37	-0.250817
1929.3	-0.251215
1931.23	-0.251541
1933.16	-0.251675
1935.09	-0.251455
1937.02	-0.251141
1938.95	-0.251215
1940.88	-0.250844
1942.81	-0.250277
1944.74	-0.2505
1946.67	-0.250475
1948.6	-0.250037
1950.53	-0.249751
1952.46	-0.249126
1954.39	-0.248647
1956.32	-0.248978
1958.25	-0.249652
1960.18	-0.249589
1962.11	-0.249063
1964.04	-0.249726
1965.96	-0.251016
1967.89	-0.251614
1969.82	-0.251504
1971.75	-0.251409
1973.68	-0.251734
1975.61	-0.251832
1977.54	-0.25184
1979.47	-0.25207
1981.4	-0.251216
1983.33	-0.249462
1985.26	-0.249347
1987.19	-0.250025
1989.12	-0.249345
1991.05	-0.2484
1992.98	-0.247793
1994.91	-0.247628
1996.84	-0.24772
1998.77	-0.247354
2000.7	-0.246833
2002.63	-0.246591
2004.56	-0.24688
2006.49	-0.247031
2008.42	-0.246845
2010.35	-0.247547
2012.28	-0.248075
2014.21	-0.247434
2016.14	-0.248072
2018.07	-0.249668
2020	-0.250203
2021.93	-0.25026
2023.86	-0.250295
2025.79	-0.250386
2027.72	-0.249628
2029.65	-0.248562
2031.58	-0.248983
2033.51	-0.249817
2035.44	-0.249483
2037.37	-0.247964
2039.3	-0.246821
2041.23	-0.246908
2043.16	-0.246716
2045.09	-0.245396
2047.02	-0.24456
2048.95	-0.244836
2050.88	-0.245444
2052.81	-0.245957
2054.74	-0.246037
2056.67	-0.247053
2058.6	-0.248578
2060.53	-0.24864
2062.46	-0.248885
2064.39	-0.249868
2066.32	-0.250104
2068.25	-0.249768
2070.18	-0.249312
2072.11	-0.249286
2074.04	-0.249392
2075.96	-0.248805
2077.89	-0.248332
2079.82	-0.248772
2081.75	-0.249194
2083.68	-0.248717
2085.61	-0.247705
2087.54	-0.247285
2089.47	-0.247895
2091.4	-0.247993
2093.33	-0.246834
2095.26	-0.246385
2097.19	-0.24662
2099.12	-0.246634
2101.05	-0.247058
2102.98	-0.247579
2104.91	-0.247751
2106.84	-0.247755
2108.77	-0.248202
2110.7	-0.248306
2112.63	-0.247981
2114.56	-0.248181
2116.49	-0.247677
2118.42	-0.247055
2120.35	-0.246797
2122.28	-0.245858
2124.21	-0.245524
2126.14	-0.245927
2128.07	-0.246086
2130	-0.246576
2131.93	-0.247476
2133.86	-0.247676
2135.79	-0.247391
2137.72	-0.247306
2139.65	-0.247704
2141.58	-0.24812
2143.51	-0.247682
2145.44	-0.24686
2147.37	-0.246313
2149.3	-0.246055
2151.23	-0.245792
2153.16	-0.246251
2155.09	-0.247491
2157.02	-0.248647
2158.95	-0.249227
2160.88	-0.248728
2162.81	-0.249027
2164.74	-0.249715
2166.67	-0.248971
2168.6	-0.248611
2170.53	-0.248689
2172.46	-0.248911
2174.39	-0.249261
2176.32	-0.248688
2178.25	-0.248795
2180.18	-0.249826
2182.11	-0.250498
2184.04	-0.25126
2185.96	-0.252028
2187.89	-0.251831
2189.82	-0.25018
2191.75	-0.24895
2193.68	-0.249041
2195.61	-0.249995
2197.54	-0.250431
2199.47	-0.249471
2201.4	-0.249247
2203.33	-0.250076
2205.26	-0.250371
2207.19	-0.250316
2209.12	-0.250637
2211.05	-0.250454
2212.98	-0.250019
2214.91	-0.249636
2216.84	-0.249373
2218.77	-0.249498
2220.7	-0.248836
2222.63	-0.248081
2224.56	-0.248284
2226.49	-0.248577
2228.42	-0.248749
2230.35	-0.248862
2232.28	-0.249184
2234.21	-0.249491
2236.14	-0.249355
2238.07	-0.249562
2240	-0.24985
2241.93	-0.249939
2243.86	-0.250302
2245.79	-0.250817
2247.72	-0.251572
2249.65	-0.252365
2251.58	-0.251462
2253.51	-0.249685
2255.44	-0.249537
2257.37	-0.250022
2259.3	-0.250726
2261.23	-0.250971
2263.16	-0.250026
2265.09	-0.25022
2267.02	-0.250848
2268.95	-0.250718
2270.88	-0.250098
2272.81	-0.24907
2274.74	-0.249351
2276.67	-0.250224
2278.6	-0.249675
2280.53	-0.249008
2282.46	-0.2498
2284.39	-0.250648
2286.32	-0.249837
2288.25	-0.248797
2290.18	-0.249216
2292.11	-0.249695
2294.04	-0.250099
2295.96	-0.251043
2297.89	-0.251684
2299.82	-0.252917
2301.75	-0.253523
2303.68	-0.25226
2305.61	-0.252257
2307.54	-0.253362
2309.47	-0.253072
2311.4	-0.252076
2313.33	-0.251946
2315.26	-0.252898
2317.19	-0.253405
2319.12	-0.252451
2321.05	-0.251076
2322.98	-0.250359
2324.91	-0.250215
2326.84	-0.250888
2328.77	-0.252652
2330.7	-0.253784
2332.63	-0.253723
2334.56	-0.25382
2336.49	-0.253747
2338.42	-0.253609
2340.35	-0.254945
2342.28	-0.256387
2344.21	-0.256091
2346.14	-0.255628
2348.07	-0.2547
2350	-0.252433
2351.93	-0.252511
2353.86	-0.255158
2355.79	-0.255736
2357.72	-0.254429
2359.65	-0.253742
2361.58	-0.254668
2363.51	-0.255982
2365.44	-0.255623
2367.37	-0.254484
2369.3	-0.254075
2371.23	-0.254732
2373.16	-0.255719
2375.09	-0.255923
2377.02	-0.255406
2378.95	-0.25668
2380.88	-0.258524
2382.81	-0.25793
2384.74	-0.256663
2386.67	-0.25672
2388.6	-0.258136
2390.53	-0.257992
2392.46	-0.256654
2394.39	-0.256575
2396.32	-0.257087
2398.25	-0.257454
2400.18	-0.256996
2402.11	-0.258178
2404.04	-0.259923
2405.96	-0.258884
2407.89	-0.257523
2409.82	-0.257134
2411.75	-0.25683
2413.68	-0.256523
2415.61	-0.257858
2417.54	-0.259685
2419.47	-0.258531
2421.4	-0.257774
2423.33	-0.259335
2425.26	-0.260369
2427.19	-0.260466
2429.12	-0.259274
2431.05	-0.258533
2432.98	-0.258854
2434.91	-0.25789
2436.84	-0.257134
2438.77	-0.258746
2440.7	-0.260246
2442.63	-0.259831
2444.56	-0.259774
2446.49	-0.259818
2448.42	-0.259967
2450.35	-0.260411
2452.28	-0.260448
2454.21	-0.260639
2456.14	-0.259895
2458.07	-0.258267
2460	-0.257233
2461.93	-0.258105
2463.86	-0.257654
2465.79	-0.256624
2467.72	-0.25925
2469.65	-0.261069
2471.58	-0.25857
2473.51	-0.255709
2475.44	-0.255723
2477.37	-0.256957
2479.3	-0.256958
2481.23	-0.256609
2483.16	-0.256076
2485.09	-0.25505
2487.02	-0.253616
2488.95	-0.251977
2490.88	-0.251779
2492.81	-0.252175
2494.74	-0.250929
2496.67	-0.249802
2498.6	-0.250302
2500.53	-0.250669
2502.46	-0.251493
2504.39	-0.252556
2506.32	-0.252427
2508.25	-0.25293
2510.18	-0.253456
2512.11	-0.25272
2514.04	-0.252239
2515.96	-0.251878
2517.89	-0.251452
2519.82	-0.252059
2521.75	-0.252605
2523.68	-0.252362
2525.61	-0.251737
2527.54	-0.25089
2529.47	-0.251138
2531.4	-0.251084
2533.33	-0.24995
2535.26	-0.249931
2537.19	-0.250053
2539.12	-0.249715
2541.05	-0.249777
2542.98	-0.249575
2544.91	-0.248463
2546.84	-0.247068
2548.77	-0.247946
2550.7	-0.250553
2552.63	-0.252185
2554.56	-0.25262
2556.49	-0.249768
2558.42	-0.247034
2560.35	-0.250023
2562.28	-0.251996
2564.21	-0.250973
2566.14	-0.25096
2568.07	-0.249897
2570	-0.248888
2571.93	-0.250099
2573.86	-0.251253
2575.79	-0.249447
2577.72	-0.247358
2579.65	-0.247315
2581.58	-0.247139
2583.51	-0.246185
2585.44	-0.243927
2587.37	-0.24115
2589.3	-0.239729
2591.23	-0.240384
2593.16	-0.240382
2595.09	-0.23982
2597.02	-0.241504
2598.95	-0.24289
2600.88	-0.242998
2602.81	-0.242306
2604.74	-0.242973
2606.67	-0.245345
2608.6	-0.246047
2610.53	-0.245819
2612.46	-0.244613
2614.39	-0.243447
2616.32	-0.244239
2618.25	-0.245177
2620.18	-0.244401
2622.11	-0.243752
2624.04	-0.245288
2625.96	-0.245638
2627.89	-0.24546
2629.82	-0.246069
2631.75	-0.245609
2633.68	-0.244809
2635.61	-0.244624
2637.54	-0.244772
2639.47	-0.243184
2641.4	-0.243043
2643.33	-0.245845
2645.26	-0.247162
2647.19	-0.24711
2649.12	-0.247186
2651.05	-0.247492
2652.98	-0.247218
2654.91	-0.245958
2656.84	-0.245043
2658.77	-0.245278
2660.7	-0.245097
2662.63	-0.24326
2664.56	-0.24186
2666.49	-0.241132
2668.42	-0.241389
2670.35	-0.242952
2672.28	-0.24415
2674.21	-0.245031
2676.14	-0.244693
2678.07	-0.242071
2680	-0.239127
2681.93	-0.240183
2683.86	-0.242659
2685.79	-0.241182
2687.72	-0.237854
2689.65	-0.23712
2691.58	-0.238648
2693.51	-0.239189
2695.44	-0.239251
2697.37	-0.23968
2699.3	-0.240006
2701.23	-0.241727
2703.16	-0.245139
2705.09	-0.245651
2707.02	-0.242055
2708.95	-0.240053
2710.88	-0.241193
2712.81	-0.242114
2714.74	-0.243255
2716.67	-0.245199
2718.6	-0.246785
2720.53	-0.248569
2722.46	-0.248099
2724.39	-0.245249
2726.32	-0.243653
2728.25	-0.243392
2730.18	-0.243613
2732.11	-0.243368
2734.04	-0.243393
2735.96	-0.245269
2737.89	-0.248238
2739.82	-0.250279
2741.75	-0.250081
2743.68	-0.248211
2745.61	-0.246244
2747.54	-0.24578
2749.47	-0.247837
2751.4	-0.249806
2753.33	-0.249127
2755.26	-0.248326
2757.19	-0.246724
2759.12	-0.244429
2761.05	-0.245255
2762.98	-0.245568
2764.91	-0.242186
2766.84	-0.239692
2768.77	-0.236801
2770.7	-0.231105
2772.63	-0.227703
2774.56	-0.226183
2776.49	-0.22591
2778.42	-0.228079
2780.35	-0.22803
2782.28	-0.226535
2784.21	-0.228671
2786.14	-0.230609
2788.07	-0.22977
2790	-0.230146
2791.93	-0.233786
2793.86	-0.238251
2795.79	-0.240581
2797.72	-0.243221
2799.65	-0.244517
2801.58	-0.244437
2803.51	-0.24688
2805.44	-0.24656
2807.37	-0.245632
2809.3	-0.247596
2811.23	-0.248785
2813.16	-0.248573
2815.09	-0.247794
2817.02	-0.248679
2818.95	-0.246201
2820.88	-0.241579
2822.81	-0.239128
2824.74	-0.235426
2826.67	-0.231979
2828.6	-0.2291
2830.53	-0.227315
2832.46	-0.224878
2834.39	-0.220344
2836.32	-0.217748
2838.25	-0.21816
2840.18	-0.222734
2842.11	-0.22617
2844.04	-0.228189
2845.96	-0.233476
2847.89	-0.237348
2849.82	-0.239606
2851.75	-0.241203
2853.68	-0.241554
2855.61	-0.241421
2857.54	-0.239471
2859.47	-0.237237
2861.4	-0.233301
2863.33	-0.228513
2865.26	-0.225269
2867.19	-0.219454
2869.12	-0.213093
2871.05	-0.209918
2872.98	-0.207498
2874.91	-0.201051
2876.84	-0.190053
2878.77	-0.183386
2880.7	-0.178943
2882.63	-0.172338
2884.56	-0.164408
2886.49	-0.154779
2888.42	-0.152319
2890.35	-0.153021
2892.28	-0.147692
2894.21	-0.141915
2896.14	-0.138404
2898.07	-0.137118
2900	-0.141192
2901.93	-0.148103
2903.86	-0.153706
2905.79	-0.161539
2907.72	-0.1712
2909.65	-0.177242
2911.58	-0.17899
2913.51	-0.178277
2915.44	-0.177198
2917.37	-0.174951
2919.3	-0.171128
2921.23	-0.17481
2923.16	-0.186055
2925.09	-0.195072
2927.02	-0.203745
2928.95	-0.213125
2930.88	-0.221623
2932.81	-0.225735
2934.74	-0.222876
2936.67	-0.219877
2938.6	-0.216742
2940.53	-0.211534
2942.46	-0.206761
2944.39	-0.20283
2946.32	-0.20274
2948.25	-0.202623
2950.18	-0.200472
2952.11	-0.201662
2954.04	-0.207396
2955.96	-0.213737
2957.89	-0.220004
2959.82	-0.231466
2961.75	-0.23812
2963.68	-0.233955
2965.61	-0.230387
2967.54	-0.225523
2969.47	-0.213999
2971.4	-0.204663
2973.33	-0.197225
2975.26	-0.189091
2977.19	-0.184419
2979.12	-0.179093
2981.05	-0.171384
2982.98	-0.164413
2984.91	-0.160773
2986.84	-0.158735
2988.77	-0.15697
2990.7	-0.157434
2992.63	-0.159196
2994.56	-0.160996
2996.49	-0.164068
2998.42	-0.166005
3000.35	-0.166578
3002.28	-0.167998
3004.21	-0.167807
3006.14	-0.170291
3008.07	-0.176001
3010	-0.180821
3011.93	-0.185129
3013.86	-0.188332
3015.79	-0.189646
3017.72	-0.191226
3019.65	-0.196246
3021.58	-0.204473
3023.51	-0.212169
3025.44	-0.215893
3027.37	-0.219541
3029.3	-0.225194
3031.23	-0.230617
3033.16	-0.235751
3035.09	-0.235933
3037.02	-0.233436
3038.95	-0.236795
3040.88	-0.24157
3042.81	-0.241646
3044.74	-0.23989
3046.67	-0.239656
3048.6	-0.241469
3050.53	-0.244186
3052.46	-0.244251
3054.39	-0.243446
3056.32	-0.245179
3058.25	-0.243765
3060.18	-0.242435
3062.11	-0.247211
3064.04	-0.25219
3065.96	-0.252521
3067.89	-0.248379
3069.82	-0.248662
3071.75	-0.253023
3073.68	-0.252296
3075.61	-0.251697
3077.54	-0.25144
3079.47	-0.249341
3081.4	-0.249695
3083.33	-0.247418
3085.26	-0.245385
3087.19	-0.246947
3089.12	-0.248173
3091.05	-0.247904
3092.98	-0.246951
3094.91	-0.24659
3096.84	-0.242353
3098.77	-0.237903
3100.7	-0.2395
3102.63	-0.242728
3104.56	-0.246879
3106.49	-0.249913
3108.42	-0.250167
3110.35	-0.252939
3112.28	-0.256279
3114.21	-0.254651
3116.14	-0.25124
3118.07	-0.250139
3120	-0.248779
3121.93	-0.246855
3123.86	-0.247994
3125.79	-0.249908
3127.72	-0.247078
3129.65	-0.244298
3131.58	-0.248267
3133.51	-0.254674
3135.44	-0.256052
3137.37	-0.252634
3139.3	-0.252551
3141.23	-0.252648
3143.16	-0.247027
3145.09	-0.244241
3147.02	-0.247372
3148.95	-0.249733
3150.88	-0.249155
3152.81	-0.247562
3154.74	-0.247406
3156.67	-0.250508
3158.6	-0.25324
3160.53	-0.251508
3162.46	-0.2471
3164.39	-0.246055
3166.32	-0.249488
3168.25	-0.250329
3170.18	-0.251636
3172.11	-0.256972
3174.04	-0.258967
3175.96	-0.254019
3177.89	-0.245587
3179.82	-0.242822
3181.75	-0.248766
3183.68	-0.255061
3185.61	-0.254036
3187.54	-0.247476
3189.47	-0.246699
3191.4	-0.251351
3193.33	-0.25055
3195.26	-0.247589
3197.19	-0.248269
3199.12	-0.250034
3201.05	-0.249943
3202.98	-0.248077
3204.91	-0.250425
3206.84	-0.252723
3208.77	-0.249167
3210.7	-0.247395
3212.63	-0.246779
3214.56	-0.247117
3216.49	-0.250691
3218.42	-0.251723
3220.35	-0.248463
3222.28	-0.243245
3224.21	-0.239861
3226.14	-0.240761
3228.07	-0.244721
3230	-0.250004
3231.93	-0.249933
3233.86	-0.247241
3235.79	-0.248556
3237.72	-0.254147
3239.65	-0.258459
3241.58	-0.255081
3243.51	-0.253278
3245.44	-0.255177
3247.37	-0.25509
3249.3	-0.255514
3251.23	-0.254003
3253.16	-0.253553
3255.09	-0.258152
3257.02	-0.257548
3258.95	-0.252553
3260.88	-0.250515
3262.81	-0.249764
3264.74	-0.249974
3266.67	-0.250563
3268.6	-0.255659
3270.53	-0.261602
3272.46	-0.259153
3274.39	-0.25771
3276.32	-0.261107
3278.25	-0.259878
3280.18	-0.257193
3282.11	-0.259919
3284.04	-0.263366
3285.96	-0.257435
3287.89	-0.253065
3289.82	-0.261456
3291.75	-0.26303
3293.68	-0.255184
3295.61	-0.252565
3297.54	-0.254709
3299.47	-0.257148
3301.4	-0.258718
3303.33	-0.259163
3305.26	-0.254429
3307.19	-0.250391
3309.12	-0.252859
3311.05	-0.254142
3312.98	-0.254495
3314.91	-0.255142
3316.84	-0.256796
3318.77	-0.258456
3320.7	-0.257439
3322.63	-0.25629
3324.56	-0.255048
3326.49	-0.253082
3328.42	-0.254009
3330.35	-0.25709
3332.28	-0.254877
3334.21	-0.252182
3336.14	-0.256503
3338.07	-0.264061
3340	-0.264735
3341.93	-0.261654
3343.86	-0.259897
3345.79	-0.25619
3347.72	-0.255552
3349.65	-0.256562
3351.58	-0.25594
3353.51	-0.253739
3355.44	-0.252337
3357.37	-0.254385
3359.3	-0.255108
3361.23	-0.251313
3363.16	-0.246865
3365.09	-0.245776
3367.02	-0.246629
3368.95	-0.251261
3370.88	-0.255513
3372.81	-0.252889
3374.74	-0.249854
3376.67	-0.250798
3378.6	-0.252159
3380.53	-0.249507
3382.46	-0.245087
3384.39	-0.246903
3386.32	-0.249434
3388.25	-0.24648
3390.18	-0.240369
3392.11	-0.235167
3394.04	-0.241408
3395.96	-0.253303
3397.89	-0.256536
3399.82	-0.248669
3401.75	-0.239342
3403.68	-0.233385
3405.61	-0.22638
3407.54	-0.227683
3409.47	-0.239217
3411.4	-0.249454
3413.33	-0.250746
3415.26	-0.245487
3417.19	-0.242573
3419.12	-0.244849
3421.05	-0.247199
3422.98	-0.245337
3424.91	-0.243479
3426.84	-0.243577
3428.77	-0.239838
3430.7	-0.237057
3432.63	-0.239879
3434.56	-0.243544
3436.49	-0.243433
3438.42	-0.243609
3440.35	-0.246267
3442.28	-0.247548
3444.21	-0.245385
3446.14	-0.244944
3448.07	-0.250039
3450	-0.25086
3451.93	-0.246149
3453.86	-0.244881
3455.79	-0.25035
3457.72	-0.253519
3459.65	-0.24926
3461.58	-0.249737
3463.51	-0.256257
3465.44	-0.254663
3467.37	-0.24569
3469.3	-0.246322
3471.23	-0.250339
3473.16	-0.243643
3475.09	-0.241245
3477.02	-0.248862
3478.95	-0.253829
3480.88	-0.253633
3482.81	-0.253317
3484.74	-0.255642
3486.67	-0.257359
3488.6	-0.256561
3490.53	-0.252109
3492.46	-0.24765
3494.39	-0.248644
3496.32	-0.250661
3498.25	-0.253645
3500.18	-0.258532
3502.11	-0.260158
3504.04	-0.257156
3505.96	-0.253042
3507.89	-0.253019
3509.82	-0.251882
3511.75	-0.25084
3513.68	-0.256163
3515.61	-0.257501
3517.54	-0.253878
3519.47	-0.251898
3521.4	-0.254078
3523.33	-0.256007
3525.26	-0.251356
3527.19	-0.2512
3529.12	-0.259792
3531.05	-0.258907
3532.98	-0.245627
3534.91	-0.244752
3536.84	-0.255932
3538.77	-0.256891
3540.7	-0.252307
3542.63	-0.251435
3544.56	-0.25039
3546.49	-0.253834
3548.42	-0.25915
3550.35	-0.254934
3552.28	-0.253124
3554.21	-0.258135
3556.14	-0.256778
3558.07	-0.256485
3560	-0.260333
3561.93	-0.257104
3563.86	-0.252948
3565.79	-0.257033
3567.72	-0.263255
3569.65	-0.262703
3571.58	-0.256138
3573.51	-0.25122
3575.44	-0.248964
3577.37	-0.247214
3579.3	-0.246278
3581.23	-0.247201
3583.16	-0.250188
3585.09	-0.255284
3587.02	-0.258203
3588.95	-0.261763
3590.88	-0.262254
3592.81	-0.252917
3594.74	-0.251243
3596.67	-0.255653
3598.6	-0.2531
3600.53	-0.250391
3602.46	-0.2526
3604.39	-0.254397
3606.32	-0.251816
3608.25	-0.250764
3610.18	-0.253118
3612.11	-0.256935
3614.04	-0.257614
3615.96	-0.254513
3617.89	-0.254656
3619.82	-0.259385
3621.75	-0.258269
3623.68	-0.247337
3625.61	-0.243172
3627.54	-0.25346
3629.47	-0.266844
3631.4	-0.260206
3633.33	-0.246076
3635.26	-0.243886
3637.19	-0.238777
3639.12	-0.236442
3641.05	-0.244354
3642.98	-0.247761
3644.91	-0.2423
3646.84	-0.243211
3648.77	-0.256342
3650.7	-0.265379
3652.63	-0.256636
3654.56	-0.244898
3656.49	-0.246546
3658.42	-0.247873
3660.35	-0.243075
3662.28	-0.245042
3664.21	-0.248879
3666.14	-0.248639
3668.07	-0.2485
3670	-0.254669
3671.93	-0.261274
3673.86	-0.258469
3675.79	-0.260092
3677.72	-0.257948
3679.65	-0.245624
3681.58	-0.24306
3683.51	-0.24321
3685.44	-0.24242
3687.37	-0.248921
3689.3	-0.259922
3691.23	-0.259437
3693.16	-0.251074
3695.09	-0.244237
3697.02	-0.239453
3698.95	-0.240789
3700.88	-0.245504
3702.81	-0.25069
3704.74	-0.247809
3706.67	-0.242325
3708.6	-0.242714
3710.53	-0.246399
3712.46	-0.255347
3714.39	-0.255395
3716.32	-0.249537
3718.25	-0.248554
3720.18	-0.245685
3722.11	-0.246078
3724.04	-0.246589
3725.96	-0.24896
3727.89	-0.250834
3729.82	-0.243094
3731.75	-0.242255
3733.68	-0.249287
3735.61	-0.254701
3737.54	-0.259787
3739.47	-0.25725
3741.4	-0.248222
3743.33	-0.252748
3745.26	-0.27329
3747.19	-0.2698
3749.12	-0.259924
3751.05	-0.272665
3752.98	-0.27648
3754.91	-0.264101
3756.84	-0.25441
3758.77	-0.251328
3760.7	-0.251129
3762.63	-0.251825
3764.56	-0.2546
3766.49	-0.258958
3768.42	-0.258145
3770.35	-0.256028
3772.28	-0.256838
3774.21	-0.256646
3776.14	-0.259034
3778.07	-0.25987
3780	-0.258404
3781.93	-0.256269
3783.86	-0.254768
3785.79	-0.254519
3787.72	-0.251976
3789.65	-0.25015
3791.58	-0.251236
3793.51	-0.255072
3795.44	-0.259061
3797.37	-0.258952
3799.3	-0.25584
3801.23	-0.263151
3803.16	-0.270754
3805.09	-0.259403
3807.02	-0.253192
3808.95	-0.251824
3810.88	-0.246196
3812.81	-0.248415
3814.74	-0.256228
3816.67	-0.263535
3818.6	-0.260825
3820.53	-0.258929
3822.46	-0.264941
3824.39	-0.260531
3826.32	-0.256387
3828.25	-0.256964
3830.18	-0.258355
3832.11	-0.26138
3834.04	-0.254837
3835.96	-0.252258
3837.89	-0.264763
3839.82	-0.269086
3841.75	-0.258781
3843.68	-0.252513
3845.61	-0.253478
3847.54	-0.249764
3849.47	-0.245345
3851.4	-0.255816
3853.33	-0.280288
3855.26	-0.29581
3857.19	-0.270177
3859.12	-0.248814
3861.05	-0.25044
3862.98	-0.252378
3864.91	-0.257752
3866.84	-0.26248
3868.77	-0.260975
3870.7	-0.263423
3872.63	-0.257272
3874.56	-0.248712
3876.49	-0.248857
3878.42	-0.249897
3880.35	-0.257875
3882.28	-0.262927
3884.21	-0.257234
3886.14	-0.258166
3888.07	-0.256461
3890	-0.248284
3891.93	-0.25196
3893.86	-0.258279
3895.79	-0.253455
3897.72	-0.248107
3899.65	-0.252174
3901.58	-0.25822
3903.51	-0.261188
3905.44	-0.261409
3907.37	-0.258317
3909.3	-0.256093
3911.23	-0.251205
3913.16	-0.245038
3915.09	-0.245312
3917.02	-0.251545
3918.95	-0.253892
3920.88	-0.255002
3922.81	-0.25603
3924.74	-0.249246
3926.67	-0.247361
3928.6	-0.250789
3930.53	-0.249905
3932.46	-0.249385
3934.39	-0.246628
3936.32	-0.248916
3938.25	-0.254452
3940.18	-0.249761
3942.11	-0.246184
3944.04	-0.244812
3945.96	-0.243811
3947.89	-0.252436
3949.82	-0.256294
3951.75	-0.246157
3953.68	-0.239894
3955.61	-0.242645
3957.54	-0.245926
3959.47	-0.246804
3961.4	-0.245375
3963.33	-0.241255
3965.26	-0.241038
3967.19	-0.248503
3969.12	-0.25022
3971.05	-0.250122
3972.98	-0.253035
3974.91	-0.25002
3976.84	-0.246323
3978.77	-0.245747
3980.7	-0.248258
3982.63	-0.252652
3984.56	-0.256232
3986.49	-0.256923
3988.42	-0.255687
3990.35	-0.253639
3992.28	-0.248941
3994.21	-0.246392
3996.14	-0.250055
3998.07	-0.255913
4000	-0.258927

## Sheet: 9
wavenumber	Transmission
700	87.9238
701.93	84.0198
703.86	84.1482
705.789	84.9541
707.719	84.9676
709.649	85.0251
711.579	84.9078
713.509	85.0394
715.439	85.2411
717.368	85.6384
719.298	85.9034
721.228	86.1292
723.158	86.013
725.088	85.7537
727.018	85.3232
728.947	85.3905
730.877	85.7828
732.807	86.4453
734.737	86.8489
736.667	87.179
738.596	87.2584
740.526	87.4159
742.456	87.5086
744.386	87.646
746.316	87.2997
748.246	86.7734
750.175	86.1565
752.105	85.9076
754.035	85.8678
755.965	86.2692
757.895	86.6356
759.825	86.9399
761.754	86.9405
763.684	86.8786
765.614	86.2642
767.544	85.1844
769.474	83.5979
771.404	81.8803
773.333	79.5455
775.263	76.6306
777.193	73.2257
779.123	70.0078
781.053	67.0513
782.982	64.6925
784.912	62.9167
786.842	62.0075
788.772	61.7464
790.702	62.2338
792.632	63.2785
794.561	64.9612
796.491	66.874
798.421	68.9771
800.351	71.0594
802.281	73.3922
804.211	75.6916
806.14	77.9221
808.07	79.7661
810	81.4971
811.93	82.9391
813.86	84.3503
815.789	85.4834
817.719	86.4116
819.649	86.892
821.579	87.3926
823.509	87.7494
825.439	88.0552
827.368	88.0473
829.298	88.0745
831.228	88.0431
833.158	88.3518
835.088	88.7505
837.018	89.2217
838.947	89.3347
840.877	89.3965
842.807	89.3278
844.737	89.3794
846.667	89.2447
848.596	89.235
850.526	89.2071
852.456	89.3018
854.386	89.2079
856.316	89.2828
858.246	89.3437
860.175	89.4795
862.105	89.3279
864.035	89.0934
865.965	88.5923
867.895	88.2368
869.825	87.8955
871.754	87.6326
873.684	87.0368
875.614	86.2922
877.544	84.9788
879.474	82.7413
881.404	78.5893
883.333	72.3421
885.263	64.7671
887.193	58.6203
889.123	56.3739
891.053	59.0579
892.982	65.1453
894.912	71.9935
896.842	77.2051
898.772	80.5504
900.702	82.4995
902.632	83.8857
904.561	84.7053
906.491	85.2387
908.421	85.4295
910.351	85.6146
912.281	85.5544
914.211	85.3622
916.14	84.7538
918.07	83.9411
920	82.7021
921.93	81.1192
923.86	78.7713
925.789	75.7029
927.719	71.8601
929.649	67.9494
931.579	64.5175
933.509	62.3204
935.439	61.4843
937.368	62.1771
939.298	64.1346
941.228	67.2721
943.158	70.9226
945.088	74.5136
947.018	77.266
948.947	79.1941
950.877	80.1584
952.807	80.3563
954.737	79.7498
956.667	78.8564
958.596	77.6322
960.526	76.1846
962.456	74.2326
964.386	71.8316
966.316	68.7221
968.246	65.239
970.175	61.6287
972.105	58.4497
974.035	55.905
975.965	54.525
977.895	54.7022
979.825	57.0409
981.754	61.4498
983.684	67.3238
985.614	73.1618
987.544	77.9867
989.474	81.2981
991.404	83.4752
993.333	84.6179
995.263	85.1982
997.193	85.2768
999.123	85.2744
1001.05	85.1847
1002.98	85.1917
1004.91	84.9129
1006.84	84.4029
1008.77	83.4766
1010.7	82.2801
1012.63	80.4559
1014.56	78.0393
1016.49	74.8031
1018.42	70.6716
1020.35	64.8692
1022.28	56.8644
1024.21	46.5904
1026.14	35.6631
1028.07	26.2817
1030	19.9595
1031.93	16.7448
1033.86	16.225
1035.79	18.0955
1037.72	22.4559
1039.65	29.2683
1041.58	37.8367
1043.51	46.4063
1045.44	53.4785
1047.37	58.3793
1049.3	61.2808
1051.23	62.0629
1053.16	60.6293
1055.09	56.5825
1057.02	50.117
1058.95	41.8927
1060.88	33.4634
1062.81	26.3361
1064.74	21.4448
1066.67	18.7511
1068.6	17.9687
1070.53	18.8188
1072.46	21.2639
1074.39	25.2732
1076.32	30.8557
1078.25	37.6709
1080.18	45.113
1082.11	52.1994
1084.04	58.2916
1085.96	62.9804
1087.89	66.517
1089.82	69.193
1091.75	71.4588
1093.68	73.1188
1095.61	74.187
1097.54	74.7414
1099.47	75.2335
1101.4	75.5438
1103.33	75.6029
1105.26	75.1072
1107.19	74.2584
1109.12	73.1085
1111.05	72.0126
1112.98	71.2129
1114.91	71.178
1116.84	71.6114
1118.77	72.1712
1120.7	72.5764
1122.63	73.0979
1124.56	73.5961
1126.49	74.0244
1128.42	74.1932
1130.35	74.4036
1132.28	74.8018
1134.21	75.705
1136.14	76.9345
1138.07	78.3541
1140	79.5431
1141.93	80.5467
1143.86	81.29
1145.79	81.9033
1147.72	82.1332
1149.65	82.0823
1151.58	81.7612
1153.51	81.567
1155.44	81.5918
1157.37	81.9433
1159.3	82.1542
1161.23	82.1382
1163.16	82.0094
1165.09	82.3048
1167.02	82.9355
1168.95	83.6925
1170.88	84.1479
1172.81	84.4991
1174.74	84.8151
1176.67	85.2321
1178.6	85.4858
1180.53	85.6297
1182.46	85.507
1184.39	85.2558
1186.32	84.7104
1188.25	83.847
1190.18	82.4638
1192.11	80.8787
1194.04	79.1954
1195.96	77.4916
1197.89	75.481
1199.82	73.3546
1201.75	71.3712
1203.68	70.021
1205.61	69.4659
1207.54	69.8748
1209.47	70.8631
1211.4	72.0405
1213.33	73.0046
1215.26	73.7122
1217.19	73.7226
1219.12	72.6475
1221.05	70.0906
1222.98	66.2093
1224.91	61.2828
1226.84	56.0529
1228.77	51.2928
1230.7	47.7719
1232.63	45.6294
1234.56	44.7523
1236.49	44.8024
1238.42	45.4241
1240.35	45.9503
1242.28	45.9042
1244.21	44.8376
1246.14	42.2999
1248.07	37.8522
1250	32.0081
1251.93	26.1249
1253.86	21.7302
1255.79	19.5873
1257.72	19.8489
1259.65	22.3712
1261.58	27.0119
1263.51	33.4347
1265.44	41.0255
1267.37	48.6914
1269.3	55.4308
1271.23	60.7357
1273.16	64.9039
1275.09	68.2276
1277.02	70.9412
1278.95	73.0398
1280.88	74.6625
1282.81	75.759
1284.74	76.5604
1286.67	77.2306
1288.6	77.956
1290.53	78.6089
1292.46	79.2859
1294.39	79.9257
1296.32	80.4783
1298.25	80.7003
1300.18	80.7367
1302.11	80.6907
1304.04	80.7115
1305.96	80.6811
1307.89	80.6668
1309.82	80.5893
1311.75	80.4861
1313.68	80.167
1315.61	79.611
1317.54	78.7736
1319.47	77.8497
1321.4	76.8313
1323.33	75.7133
1325.26	74.1861
1327.19	72.1305
1329.12	69.5974
1331.05	66.9644
1332.98	64.4404
1334.91	62.3456
1336.84	60.9822
1338.77	60.8167
1340.7	62.113
1342.63	64.9155
1344.56	68.6635
1346.49	72.5677
1348.42	75.8294
1350.35	78.2065
1352.28	79.7638
1354.21	80.8736
1356.14	81.6696
1358.07	82.2556
1360	82.6151
1361.93	82.9272
1363.86	83.2251
1365.79	83.6112
1367.72	83.9929
1369.65	84.3399
1371.58	84.5097
1373.51	84.5861
1375.44	84.6082
1377.37	84.6926
1379.3	84.7694
1381.23	84.9214
1383.16	85.108
1385.09	85.2673
1387.02	85.1785
1388.95	84.9102
1390.88	84.5338
1392.81	84.0898
1394.74	83.3744
1396.67	82.4698
1398.6	81.6146
1400.53	81.0825
1402.46	80.736
1404.39	80.368
1406.32	79.7702
1408.25	78.9683
1410.18	77.8066
1412.11	75.9973
1414.04	73.1258
1415.96	69.0623
1417.89	63.9013
1419.82	58.1035
1421.75	52.1994
1423.68	46.8699
1425.61	42.9068
1427.54	41.1117
1429.47	41.7386
1431.4	44.2278
1433.33	47.1423
1435.26	49.0271
1437.19	49.4206
1439.12	48.96
1441.05	48.2527
1442.98	47.3106
1444.91	45.6729
1446.84	43.0389
1448.77	39.4706
1450.7	35.3084
1452.63	30.7833
1454.56	26.0813
1456.49	21.635
1458.42	18.1745
1460.35	16.2088
1462.28	15.7578
1464.21	16.2527
1466.14	16.5868
1468.07	15.9276
1470	14.884
1471.93	14.8911
1473.86	17.0425
1475.79	21.8356
1477.72	28.9895
1479.65	37.2087
1481.58	44.9234
1483.51	51.2091
1485.44	55.8568
1487.37	58.8997
1489.3	60.5264
1491.23	60.9489
1493.16	60.4848
1495.09	59.7232
1497.02	59.5592
1498.95	60.6
1500.88	62.8172
1502.81	65.7098
1504.74	68.8589
1506.67	71.9641
1508.6	74.7185
1510.53	76.8557
1512.46	78.4082
1514.39	79.4777
1516.32	80.1277
1518.25	80.4777
1520.18	80.8231
1522.11	81.3204
1524.04	81.8991
1525.96	82.4113
1527.89	82.8544
1529.82	83.2265
1531.75	83.5219
1533.68	83.7498
1535.61	83.9631
1537.54	84.2058
1539.47	84.5514
1541.4	84.9457
1543.33	85.252
1545.26	85.4163
1547.19	85.5369
1549.12	85.6776
1551.05	85.8146
1552.98	85.8461
1554.91	85.7526
1556.84	85.7037
1558.77	85.9053
1560.7	86.2472
1562.63	86.3951
1564.56	86.1997
1566.49	85.8711
1568.42	85.6731
1570.35	85.5889
1572.28	85.4231
1574.21	85.1814
1576.14	84.9915
1578.07	84.8071
1580	84.5404
1581.93	84.2109
1583.86	83.8092
1585.79	83.3386
1587.72	82.9354
1589.65	82.6881
1591.58	82.5335
1593.51	82.3221
1595.44	81.8823
1597.37	81.1145
1599.3	80.1397
1601.23	79.1125
1603.16	77.9753
1605.09	76.4907
1607.02	74.4618
1608.95	71.7643
1610.88	68.466
1612.81	64.9551
1614.74	61.9227
1616.67	60.1034
1618.6	60.0529
1620.53	61.9068
1622.46	65.2525
1624.39	69.159
1626.32	72.6999
1628.25	75.5056
1630.18	77.7543
1632.11	79.6349
1634.04	81.234
1635.96	82.5823
1637.89	83.6624
1639.82	84.3853
1641.75	84.8054
1643.68	85.0773
1645.61	85.3792
1647.54	85.6844
1649.47	85.8329
1651.4	85.8169
1653.33	85.9334
1655.26	86.242
1657.19	86.5291
1659.12	86.6822
1661.05	86.8184
1662.98	86.9251
1664.91	86.9539
1666.84	86.872
1668.77	86.7356
1670.7	86.6141
1672.63	86.6359
1674.56	86.7778
1676.49	86.933
1678.42	86.9611
1680.35	86.8647
1682.28	86.7003
1684.21	86.6111
1686.14	86.6148
1688.07	86.6798
1690	86.749
1691.93	86.8244
1693.86	86.8231
1695.79	86.7923
1697.72	86.8151
1699.65	86.9158
1701.58	86.9528
1703.51	86.915
1705.44	86.8453
1707.37	86.8274
1709.3	86.844
1711.23	86.8898
1713.16	86.8923
1715.09	86.9308
1717.02	87.0693
1718.95	87.2661
1720.88	87.3722
1722.81	87.4792
1724.74	87.6267
1726.67	87.7245
1728.6	87.6302
1730.53	87.4591
1732.46	87.3646
1734.39	87.4422
1736.32	87.5565
1738.25	87.658
1740.18	87.7141
1742.11	87.7003
1744.04	87.5748
1745.96	87.5262
1747.89	87.5956
1749.82	87.6598
1751.75	87.5652
1753.68	87.4502
1755.61	87.4297
1757.54	87.5549
1759.47	87.7689
1761.4	88.09
1763.33	88.3621
1765.26	88.5
1767.19	88.5363
1769.12	88.5983
1771.05	88.6154
1772.98	88.6147
1774.91	88.591
1776.84	88.5385
1778.77	88.4148
1780.7	88.3301
1782.63	88.2296
1784.56	88.0724
1786.49	87.867
1788.42	87.7557
1790.35	87.724
1792.28	87.8082
1794.21	87.9649
1796.14	88.1157
1798.07	88.0749
1800	87.8881
1801.93	87.6462
1803.86	87.5193
1805.79	87.5386
1807.72	87.6591
1809.65	87.6605
1811.58	87.547
1813.51	87.4156
1815.44	87.3819
1817.37	87.3201
1819.3	87.1725
1821.23	86.9925
1823.16	87.0125
1825.09	87.1539
1827.02	87.2276
1828.95	87.1815
1830.88	87.2868
1832.81	87.598
1834.74	87.9729
1836.67	88.1402
1838.6	88.1181
1840.53	88.0316
1842.46	88.051
1844.39	88.1188
1846.32	88.2379
1848.25	88.3978
1850.18	88.6305
1852.11	88.7622
1854.04	88.7255
1855.96	88.537
1857.89	88.4006
1859.82	88.3418
1861.75	88.2983
1863.68	88.1493
1865.61	88.0405
1867.54	88.0231
1869.47	88.1015
1871.4	88.2193
1873.33	88.4285
1875.26	88.5939
1877.19	88.6521
1879.12	88.5645
1881.05	88.4588
1882.98	88.3622
1884.91	88.2979
1886.84	88.1811
1888.77	88.1265
1890.7	88.2012
1892.63	88.4457
1894.56	88.743
1896.49	89.0443
1898.42	89.1416
1900.35	88.9616
1902.28	88.623
1904.21	88.4648
1906.14	88.4754
1908.07	88.4464
1910	88.1736
1911.93	87.8466
1913.86	87.6673
1915.79	87.7101
1917.72	87.7876
1919.65	87.8793
1921.58	87.9524
1923.51	88.0075
1925.44	87.9986
1927.37	88.0463
1929.3	88.1228
1931.23	88.1994
1933.16	88.1873
1935.09	88.1519
1937.02	88.0852
1938.95	88.0312
1940.88	87.9291
1942.81	87.8138
1944.74	87.6664
1946.67	87.6064
1948.6	87.6456
1950.53	87.7482
1952.46	87.7578
1954.39	87.7557
1956.32	87.8172
1958.25	87.9787
1960.18	88.0811
1962.11	88.109
1964.04	88.1028
1965.96	88.2311
1967.89	88.4449
1969.82	88.6068
1971.75	88.4823
1973.68	88.1195
1975.61	87.7175
1977.54	87.5249
1979.47	87.4236
1981.4	87.2915
1983.33	87.1358
1985.26	87.1147
1987.19	87.1194
1989.12	87.0761
1991.05	87.0072
1992.98	87.0614
1994.91	87.1276
1996.84	87.0752
1998.77	86.811
2000.7	86.5101
2002.63	86.3366
2004.56	86.408
2006.49	86.5796
2008.42	86.7724
2010.35	86.9471
2012.28	87.1594
2014.21	87.2928
2016.14	87.3142
2018.07	87.2472
2020	87.2532
2021.93	87.2936
2023.86	87.2898
2025.79	87.1588
2027.72	87.024
2029.65	86.9155
2031.58	86.8687
2033.51	86.833
2035.44	86.8077
2037.37	86.6789
2039.3	86.4851
2041.23	86.3068
2043.16	86.2766
2045.09	86.3396
2047.02	86.446
2048.95	86.4456
2050.88	86.3434
2052.81	86.2714
2054.74	86.4125
2056.67	86.5612
2058.6	86.5236
2060.53	86.3733
2062.46	86.3924
2064.39	86.5374
2066.32	86.6762
2068.25	86.7627
2070.18	86.9397
2072.11	87.1033
2074.04	87.1063
2075.96	86.9819
2077.89	86.9998
2079.82	87.1235
2081.75	87.1679
2083.68	86.9877
2085.61	86.7577
2087.54	86.6836
2089.47	86.8133
2091.4	86.8821
2093.33	86.8185
2095.26	86.6997
2097.19	86.6189
2099.12	86.5432
2101.05	86.579
2102.98	86.744
2104.91	86.9487
2106.84	86.9663
2108.77	86.8019
2110.7	86.5946
2112.63	86.4993
2114.56	86.444
2116.49	86.3808
2118.42	86.2514
2120.35	86.1069
2122.28	86.0145
2124.21	86.1269
2126.14	86.4077
2128.07	86.7331
2130	86.9459
2131.93	87.0371
2133.86	86.9635
2135.79	86.7974
2137.72	86.6244
2139.65	86.5216
2141.58	86.4341
2143.51	86.391
2145.44	86.3789
2147.37	86.4282
2149.3	86.5145
2151.23	86.5877
2153.16	86.5058
2155.09	86.3341
2157.02	86.2075
2158.95	86.1862
2160.88	86.1148
2162.81	85.9378
2164.74	85.7428
2166.67	85.7586
2168.6	86.0149
2170.53	86.3125
2172.46	86.3155
2174.39	86.0167
2176.32	85.7192
2178.25	85.7179
2180.18	85.9073
2182.11	86.1257
2184.04	86.2943
2185.96	86.3931
2187.89	86.398
2189.82	86.459
2191.75	86.617
2193.68	86.794
2195.61	86.8779
2197.54	86.8722
2199.47	86.7398
2201.4	86.4736
2203.33	86.0866
2205.26	85.7458
2207.19	85.6133
2209.12	85.755
2211.05	85.9817
2212.98	86.0917
2214.91	86.1081
2216.84	86.2866
2218.77	86.5903
2220.7	86.7345
2222.63	86.5705
2224.56	86.2705
2226.49	85.9593
2228.42	85.6889
2230.35	85.5436
2232.28	85.6624
2234.21	85.9098
2236.14	86.0667
2238.07	86.1685
2240	86.4071
2241.93	86.6285
2243.86	86.5673
2245.79	86.2615
2247.72	86.0698
2249.65	86.1582
2251.58	86.3663
2253.51	86.4763
2255.44	86.5224
2257.37	86.5216
2259.3	86.4508
2261.23	86.4276
2263.16	86.5502
2265.09	86.5424
2267.02	86.2427
2268.95	85.9495
2270.88	85.9882
2272.81	86.2188
2274.74	86.3287
2276.67	86.2016
2278.6	86.0006
2280.53	85.8901
2282.46	85.9173
2284.39	86.0523
2286.32	86.2981
2288.25	86.5515
2290.18	86.6357
2292.11	86.529
2294.04	86.483
2295.96	86.6449
2297.89	86.8328
2299.82	86.7669
2301.75	86.513
2303.68	86.3736
2305.61	86.4502
2307.54	86.5813
2309.47	86.7109
2311.4	86.8025
2313.33	86.6531
2315.26	86.1766
2317.19	85.6854
2319.12	85.5361
2321.05	85.7903
2322.98	86.2452
2324.91	86.6082
2326.84	86.6164
2328.77	86.2941
2330.7	85.9889
2332.63	85.96
2334.56	86.0763
2336.49	86.1295
2338.42	86.1416
2340.35	86.253
2342.28	86.4976
2344.21	86.7633
2346.14	86.9439
2348.07	87.0962
2350	87.2764
2351.93	87.4083
2353.86	87.4894
2355.79	87.5772
2357.72	87.576
2359.65	87.435
2361.58	87.3245
2363.51	87.3228
2365.44	87.3396
2367.37	87.4658
2369.3	87.908
2371.23	88.421
2373.16	88.4646
2375.09	88.077
2377.02	87.8441
2378.95	87.9085
2380.88	87.8833
2382.81	87.5944
2384.74	87.2535
2386.67	87.0037
2388.6	86.8194
2390.53	86.688
2392.46	86.6452
2394.39	86.6236
2396.32	86.6073
2398.25	86.7934
2400.18	87.3212
2402.11	87.8913
2404.04	88.0578
2405.96	87.7382
2407.89	87.3115
2409.82	87.1856
2411.75	87.4581
2413.68	87.8299
2415.61	87.8584
2417.54	87.3871
2419.47	86.8556
2421.4	86.7659
2423.33	87.0603
2425.26	87.3017
2427.19	87.3443
2429.12	87.2679
2431.05	87.0695
2432.98	86.7866
2434.91	86.6849
2436.84	86.771
2438.77	86.6981
2440.7	86.3262
2442.63	85.9951
2444.56	85.9921
2446.49	86.3074
2448.42	86.7238
2450.35	87.0573
2452.28	87.1915
2454.21	87.0984
2456.14	86.8186
2458.07	86.5608
2460	86.4489
2461.93	86.4053
2463.86	86.3105
2465.79	86.2871
2467.72	86.4844
2469.65	86.8445
2471.58	87.0991
2473.51	87.1034
2475.44	86.8371
2477.37	86.4532
2479.3	86.2473
2481.23	86.4246
2483.16	86.7374
2485.09	86.8325
2487.02	86.6255
2488.95	86.3437
2490.88	86.1715
2492.81	86.1564
2494.74	86.2099
2496.67	86.2708
2498.6	86.207
2500.53	85.9918
2502.46	85.8783
2504.39	86.2211
2506.32	86.807
2508.25	87.0808
2510.18	86.8774
2512.11	86.5582
2514.04	86.2976
2515.96	86.049
2517.89	85.8064
2519.82	85.7101
2521.75	85.7958
2523.68	86.0197
2525.61	86.2458
2527.54	86.3983
2529.47	86.3702
2531.4	86.1511
2533.33	85.8634
2535.26	85.7177
2537.19	85.7141
2539.12	85.7972
2541.05	85.9681
2542.98	86.3374
2544.91	86.816
2546.84	87.2216
2548.77	87.5095
2550.7	87.7761
2552.63	87.8187
2554.56	87.4882
2556.49	87.0407
2558.42	86.927
2560.35	87.1406
2562.28	87.354
2564.21	87.3194
2566.14	87.1038
2568.07	86.7274
2570	86.2559
2571.93	85.8802
2573.86	85.8238
2575.79	85.9732
2577.72	86.0722
2579.65	85.971
2581.58	85.8236
2583.51	85.6916
2585.44	85.4804
2587.37	85.1545
2589.3	84.9706
2591.23	85.0157
2593.16	85.1359
2595.09	85.1121
2597.02	84.9105
2598.95	84.5879
2600.88	84.4801
2602.81	84.816
2604.74	85.3042
2606.67	85.4259
2608.6	85.3676
2610.53	85.5487
2612.46	85.9337
2614.39	86.2522
2616.32	86.5901
2618.25	87.0573
2620.18	87.6601
2622.11	88.1036
2624.04	88.0217
2625.96	87.4667
2627.89	87.0578
2629.82	87.1077
2631.75	87.4573
2633.68	87.694
2635.61	87.5437
2637.54	87.0114
2639.47	86.5188
2641.4	86.4169
2643.33	86.7253
2645.26	87.0361
2647.19	87.0645
2649.12	86.9162
2651.05	86.8915
2652.98	86.9604
2654.91	87.1017
2656.84	87.373
2658.77	87.7506
2660.7	88.0854
2662.63	88.3555
2664.56	88.2858
2666.49	87.8237
2668.42	87.5206
2670.35	87.6738
2672.28	87.5173
2674.21	86.6983
2676.14	86.0539
2678.07	86.4182
2680	87.4256
2681.93	88.187
2683.86	88.1318
2685.79	87.3256
2687.72	86.1349
2689.65	85.2743
2691.58	85.3308
2693.51	86.1347
2695.44	86.7768
2697.37	86.9036
2699.3	86.9426
2701.23	87.227
2703.16	87.3863
2705.09	87.099
2707.02	86.5286
2708.95	86.115
2710.88	85.9373
2712.81	85.9474
2714.74	86.2194
2716.67	86.8283
2718.6	87.4727
2720.53	88.0856
2722.46	88.7837
2724.39	89.2085
2726.32	88.7251
2728.25	87.6654
2730.18	86.8484
2732.11	86.6492
2734.04	86.8539
2735.96	87.145
2737.89	87.2019
2739.82	87.092
2741.75	87.0269
2743.68	86.9323
2745.61	86.498
2747.54	85.954
2749.47	85.6686
2751.4	85.5858
2753.33	85.3503
2755.26	84.9069
2757.19	84.435
2759.12	84.3462
2761.05	84.7834
2762.98	85.4079
2764.91	85.7258
2766.84	85.6993
2768.77	85.3964
2770.7	84.9017
2772.63	84.4316
2774.56	84.2801
2776.49	84.2813
2778.42	84.1404
2780.35	83.8507
2782.28	83.7849
2784.21	84.2236
2786.14	85.1608
2788.07	86.1269
2790	86.7689
2791.93	87.1755
2793.86	87.4988
2795.79	87.5009
2797.72	87.5037
2799.65	88.4485
2801.58	90.5023
2803.51	92.3207
2805.44	92.7572
2807.37	91.973
2809.3	90.7381
2811.23	89.4249
2813.16	88.2898
2815.09	87.6272
2817.02	87.569
2818.95	87.6255
2820.88	87.3657
2822.81	87.0909
2824.74	87.3154
2826.67	87.6556
2828.6	87.4342
2830.53	86.6073
2832.46	85.8512
2834.39	85.8405
2836.32	86.822
2838.25	88.1727
2840.18	88.9304
2842.11	88.9098
2844.04	89.0564
2845.96	89.8604
2847.89	90.7177
2849.82	91.1954
2851.75	91.9055
2853.68	93.02
2855.61	93.6958
2857.54	93.2909
2859.47	92.4028
2861.4	91.9955
2863.33	92.3905
2865.26	92.8062
2867.19	92.1161
2869.12	90.0507
2871.05	87.7123
2872.98	86.1096
2874.91	85.0035
2876.84	83.4956
2878.77	81.569
2880.7	79.9413
2882.63	78.9081
2884.56	77.8534
2886.49	76.3728
2888.42	74.9648
2890.35	74.2832
2892.28	74.2886
2894.21	74.8362
2896.14	75.7534
2898.07	76.3308
2900	75.8126
2901.93	74.6847
2903.86	74.1358
2905.79	74.8152
2907.72	76.4951
2909.65	78.7031
2911.58	80.9796
2913.51	82.7147
2915.44	83.1404
2917.37	82.4596
2919.3	82.0651
2921.23	83.1841
2923.16	85.6942
2925.09	88.4823
2927.02	90.3031
2928.95	90.8013
2930.88	90.4814
2932.81	90.0402
2934.74	89.8563
2936.67	89.9059
2938.6	89.8092
2940.53	89.5388
2942.46	89.2419
2944.39	88.8247
2946.32	88.4312
2948.25	88.6756
2950.18	89.4681
2952.11	90.1084
2954.04	90.57
2955.96	91.5586
2957.89	93.1099
2959.82	94.4375
2961.75	94.7802
2963.68	94.0233
2965.61	92.4036
2967.54	90.285
2969.47	88.0988
2971.4	86.2717
2973.33	84.6978
2975.26	82.9315
2977.19	80.88
2979.12	78.921
2981.05	77.1139
2982.98	75.2673
2984.91	73.6326
2986.84	72.7657
2988.77	72.5698
2990.7	72.48
2992.63	72.298
2994.56	72.4027
2996.49	73.0709
2998.42	73.9333
3000.35	74.1328
3002.28	73.3993
3004.21	72.4407
3006.14	72.099
3008.07	72.4392
3010	73.119
3011.93	74.0525
3013.86	75.2176
3015.79	76.224
3017.72	76.8524
3019.65	77.1572
3021.58	77.1173
3023.51	77.0089
3025.44	77.689
3027.37	79.5581
3029.3	81.9089
3031.23	83.5985
3033.16	84.3229
3035.09	84.7032
3037.02	85.1369
3038.95	85.1836
3040.88	84.6598
3042.81	84.302
3044.74	84.7852
3046.67	85.654
3048.6	85.8642
3050.53	85.1739
3052.46	84.5939
3054.39	84.9748
3056.32	85.9155
3058.25	86.5169
3060.18	86.5591
3062.11	86.2261
3064.04	85.7533
3065.96	85.5241
3067.89	85.6141
3069.82	85.4258
3071.75	84.79
3073.68	84.6761
3075.61	85.8538
3077.54	87.4373
3079.47	87.9621
3081.4	87.3828
3083.33	86.7805
3085.26	86.7193
3087.19	86.9974
3089.12	87.3267
3091.05	87.8127
3092.98	88.5227
3094.91	88.7476
3096.84	87.6305
3098.77	85.7151
3100.7	84.4955
3102.63	84.6331
3104.56	85.562
3106.49	86.5605
3108.42	87.33
3110.35	87.59
3112.28	87.0223
3114.21	86.0452
3116.14	85.7756
3118.07	86.7211
3120	88.0922
3121.93	88.9895
3123.86	89.4225
3125.79	89.4991
3127.72	88.8817
3129.65	87.4858
3131.58	85.6623
3133.51	83.9148
3135.44	82.6338
3137.37	81.7753
3139.3	81.3229
3141.23	81.886
3143.16	83.8107
3145.09	85.9801
3147.02	86.6087
3148.95	85.6076
3150.88	84.8516
3152.81	85.5884
3154.74	87.1927
3156.67	88.6647
3158.6	89.7352
3160.53	90.2117
3162.46	89.9709
3164.39	89.6313
3166.32	89.7812
3168.25	90.0747
3170.18	90.3208
3172.11	91.0988
3174.04	92.0998
3175.96	91.7723
3177.89	89.716
3179.82	87.286
3181.75	85.6375
3183.68	84.9717
3185.61	85.1057
3187.54	85.8469
3189.47	87.2616
3191.4	89.1854
3193.33	90.555
3195.26	90.3686
3197.19	88.9972
3199.12	87.5504
3201.05	86.6508
3202.98	86.0629
3204.91	85.4408
3206.84	84.9059
3208.77	84.4401
3210.7	83.9309
3212.63	83.9526
3214.56	84.5662
3216.49	84.4849
3218.42	83.1572
3220.35	81.917
3222.28	81.8435
3224.21	82.6196
3226.14	83.8697
3228.07	85.8438
3230	88.1464
3231.93	89.7275
3233.86	90.2677
3235.79	89.8698
3237.72	88.3136
3239.65	86.0757
3241.58	84.2
3243.51	83.106
3245.44	82.7773
3247.37	83.3524
3249.3	84.6386
3251.23	85.822
3253.16	86.0119
3255.09	85.2165
3257.02	84.3017
3258.95	83.9926
3260.88	84.5133
3262.81	85.9306
3264.74	87.7483
3266.67	88.9297
3268.6	88.9444
3270.53	88.3565
3272.46	88.1596
3274.39	88.7212
3276.32	89.1243
3278.25	88.4533
3280.18	87.2542
3282.11	86.5657
3284.04	86.4665
3285.96	86.5605
3287.89	86.6003
3289.82	86.4047
3291.75	85.7303
3293.68	84.7383
3295.61	84.1195
3297.54	84.251
3299.47	84.5834
3301.4	84.686
3303.33	84.8398
3305.26	85.3858
3307.19	86.3604
3309.12	87.5549
3311.05	88.2185
3312.98	87.7389
3314.91	86.4374
3316.84	85.0425
3318.77	83.9901
3320.7	83.8036
3322.63	84.8591
3324.56	86.5866
3326.49	87.7618
3328.42	88.0522
3330.35	88.1252
3332.28	88.535
3334.21	89.3208
3336.14	90.3291
3338.07	91.2751
3340	91.8891
3341.93	91.6428
3343.86	90.2245
3345.79	88.5805
3347.72	88.1684
3349.65	88.8836
3351.58	89.049
3353.51	87.5884
3355.44	85.8077
3357.37	85.6367
3359.3	86.8847
3361.23	87.6026
3363.16	87.0553
3365.09	86.5068
3367.02	87.2347
3368.95	88.8971
3370.88	90.0055
3372.81	89.4142
3374.74	87.4295
3376.67	85.4125
3378.6	84.7291
3380.53	85.7284
3382.46	87.4995
3384.39	88.5817
3386.32	88.3431
3388.25	87.1487
3390.18	85.7433
3392.11	84.8373
3394.04	84.867
3395.96	85.819
3397.89	87.4763
3399.82	89.2781
3401.75	90.668
3403.68	91.4699
3405.61	91.5925
3407.54	91.1171
3409.47	90.5227
3411.4	89.6483
3413.33	88.2876
3415.26	87.4205
3417.19	87.852
3419.12	88.8002
3421.05	89.2761
3422.98	88.9139
3424.91	87.5159
3426.84	85.3103
3428.77	83.3454
3430.7	82.6365
3432.63	83.3424
3434.56	84.3914
3436.49	84.5947
3438.42	84.2129
3440.35	84.176
3442.28	84.5082
3444.21	85.4256
3446.14	87.578
3448.07	90.023
3450	90.5585
3451.93	88.8343
3453.86	86.4294
3455.79	84.8929
3457.72	84.8151
3459.65	85.5074
3461.58	85.5978
3463.51	84.8111
3465.44	83.9896
3467.37	83.7785
3469.3	84.0722
3471.23	84.3426
3473.16	83.9949
3475.09	82.8942
3477.02	81.6757
3478.95	81.6425
3480.88	83.5128
3482.81	86.259
3484.74	87.9424
3486.67	87.9687
3488.6	87.1401
3490.53	86.2604
3492.46	85.6988
3494.39	85.4931
3496.32	85.4596
3498.25	85.9269
3500.18	87.3885
3502.11	89.3124
3504.04	90.1884
3505.96	89.26
3507.89	87.591
3509.82	86.8473
3511.75	87.0327
3513.68	86.918
3515.61	86.4789
3517.54	86.7658
3519.47	87.5809
3521.4	87.8801
3523.33	87.6055
3525.26	87.3615
3527.19	87.1833
3529.12	86.9112
3531.05	86.5097
3532.98	85.7631
3534.91	84.7771
3536.84	84.5799
3538.77	85.6789
3540.7	86.9418
3542.63	87.0443
3544.56	86.0805
3546.49	84.9361
3548.42	84.4382
3550.35	84.6736
3552.28	84.6409
3554.21	83.6074
3556.14	82.5829
3558.07	82.927
3560	84.4374
3561.93	85.7688
3563.86	86.3033
3565.79	86.458
3567.72	86.4669
3569.65	86.113
3571.58	85.6634
3573.51	85.8897
3575.44	87.1
3577.37	88.5563
3579.3	89.2868
3581.23	89.2134
3583.16	88.758
3585.09	87.9
3587.02	86.7659
3588.95	86.1173
3590.88	86.4458
3592.81	87.1996
3594.74	87.3568
3596.67	86.6598
3598.6	85.8436
3600.53	85.3346
3602.46	84.7817
3604.39	84.1671
3606.32	84.2281
3608.25	85.4576
3610.18	87.3328
3612.11	88.4216
3614.04	87.599
3615.96	85.5764
3617.89	84.1353
3619.82	83.74
3621.75	83.3384
3623.68	82.3171
3625.61	81.3257
3627.54	81.3815
3629.47	82.87
3631.4	84.8822
3633.33	85.751
3635.26	85.0656
3637.19	84.1259
3639.12	84.0057
3641.05	84.6016
3642.98	85.5059
3644.91	86.5148
3646.84	87.3865
3648.77	87.7603
3650.7	87.3849
3652.63	86.55
3654.56	86.166
3656.49	86.5413
3658.42	86.6891
3660.35	85.9956
3662.28	85.6424
3664.21	86.7209
3666.14	88.3434
3668.07	89.0748
3670	89.095
3671.93	89.2705
3673.86	89.6189
3675.79	89.6867
3677.72	89.4696
3679.65	89.4018
3681.58	89.6824
3683.51	89.6802
3685.44	89.0177
3687.37	88.604
3689.3	88.9066
3691.23	88.3206
3693.16	85.8909
3695.09	83.6703
3697.02	83.8018
3698.95	85.4351
3700.88	86.2569
3702.81	85.6935
3704.74	85.1507
3706.67	85.3877
3708.6	85.7083
3710.53	85.6126
3712.46	85.6323
3714.39	86.042
3716.32	86.5749
3718.25	87.0263
3720.18	87.2223
3722.11	86.8617
3724.04	86.2094
3725.96	85.9675
3727.89	86.3625
3729.82	86.8727
3731.75	87.3428
3733.68	88.072
3735.61	88.7648
3737.54	88.6564
3739.47	88.1249
3741.4	88.4054
3743.33	89.8308
3745.26	91.0778
3747.19	91.0071
3749.12	90.2978
3751.05	90.0625
3752.98	89.6262
3754.91	87.8778
3756.84	85.4309
3758.77	83.856
3760.7	83.6374
3762.63	84.4701
3764.56	86.0683
3766.49	88.0956
3768.42	89.8647
3770.35	90.7841
3772.28	90.2807
3774.21	88.6156
3776.14	87.4881
3778.07	88.3904
3780	90.367
3781.93	91.1231
3783.86	89.6024
3785.79	86.7905
3787.72	84.2556
3789.65	83.1758
3791.58	83.5369
3793.51	84.4095
3795.44	85.2391
3797.37	86.5685
3799.3	88.5509
3801.23	90.5036
3803.16	91.757
3805.09	92.3825
3807.02	92.7138
3808.95	92.9258
3810.88	92.6502
3812.81	91.8182
3814.74	90.777
3816.67	89.7577
3818.6	88.7399
3820.53	88.2153
3822.46	88.4472
3824.39	88.8106
3826.32	88.3752
3828.25	87.4477
3830.18	87.121
3832.11	88.0309
3834.04	89.4772
3835.96	90.4536
3837.89	90.9507
3839.82	91.638
3841.75	91.9466
3843.68	91.2067
3845.61	90.1564
3847.54	89.7864
3849.47	89.8359
3851.4	90.063
3853.33	90.5076
3855.26	90.9633
3857.19	90.8092
3859.12	89.9027
3861.05	88.5377
3862.98	87.2991
3864.91	86.5273
3866.84	86.488
3868.77	87.06
3870.7	87.9302
3872.63	88.5948
3874.56	88.9349
3876.49	89.1677
3878.42	89.6229
3880.35	90.2079
3882.28	91.2908
3884.21	93.1449
3886.14	94.8885
3888.07	95.058
3890	93.9969
3891.93	92.997
3893.86	92.6088
3895.79	92.4776
3897.72	92.667
3899.65	92.8802
3901.58	92.1027
3903.51	89.8851
3905.44	87.5457
3907.37	86.1047
3909.3	85.8392
3911.23	86.8135
3913.16	88.6719
3915.09	90.2163
3917.02	91.109
3918.95	91.7527
3920.88	92.732
3922.81	94.0851
3924.74	94.9661
3926.67	94.2646
3928.6	92.8232
3930.53	91.7586
3932.46	90.9194
3934.39	89.8016
3936.32	88.7912
3938.25	88.1394
3940.18	88.204
3942.11	88.9983
3944.04	90.0341
3945.96	90.5155
3947.89	90.3279
3949.82	89.5821
3951.75	88.7481
3953.68	88.1612
3955.61	88.0974
3957.54	88.3767
3959.47	88.7918
3961.4	88.9326
3963.33	88.9227
3965.26	89.034
3967.19	89.4945
3969.12	90.1545
3971.05	91.0127
3972.98	91.6756
3974.91	92.0146
3976.84	91.8822
3978.77	91.1654
3980.7	90.0724
3982.63	89.6459
3984.56	89.6025
3986.49	88.8215
3988.42	87.3384
3990.35	86.1856
3992.28	85.5664
3994.21	85.9228
3996.14	87.0894
3998.07	89.0414
4000	92.6014

## Sheet: B
wavenumber	Transmission
700	141.351
701.93	142.473
703.86	144.203
705.789	145.048
707.719	145.079
709.649	145.496
711.579	146.431
713.509	147.494
715.439	148.356
717.368	148.59
719.298	148.423
721.228	148.951
723.158	149.439
725.088	149.107
727.018	149.321
728.947	149.804
730.877	149.697
732.807	149.689
734.737	150.02
736.667	149.817
738.596	149.011
740.526	148.903
742.456	149.131
744.386	148.752
746.316	148.133
748.246	147.255
750.175	146.266
752.105	145.41
754.035	144.251
755.965	142.611
757.895	140.408
759.825	137.725
761.754	135.537
763.684	133.946
765.614	131.926
767.544	128.681
769.474	123.893
771.404	118.387
773.333	114.617
775.263	115.017
777.193	118.965
779.123	124.635
781.053	131.604
782.982	138.466
784.912	143.009
786.842	145.465
788.772	147.175
790.702	147.996
792.632	148.146
794.561	148.166
796.491	147.898
798.421	147.886
800.351	147.072
802.281	144.73
804.211	142.603
806.14	140.64
808.07	138.224
810	136.162
811.93	134.523
813.86	132.765
815.789	131.02
817.719	129.622
819.649	128.269
821.579	127.094
823.509	125.673
825.439	122.611
827.368	118.239
829.298	112.445
831.228	104.904
833.158	97.3903
835.088	91.8324
837.018	89.0998
838.947	89.4289
840.877	93.1993
842.807	100.737
844.737	111.035
846.667	121.655
848.596	130.389
850.526	136.251
852.456	139.441
854.386	141.524
856.316	143.354
858.246	144.467
860.175	145.433
862.105	146.807
864.035	147.905
865.965	148.303
867.895	148.374
869.825	148.763
871.754	149.235
873.684	149.323
875.614	149.203
877.544	149.054
879.474	149.395
881.404	149.793
883.333	149.871
885.263	150.124
887.193	149.901
889.123	149.511
891.053	149.752
892.982	149.779
894.912	149.01
896.842	147.702
898.772	145.846
900.702	143.485
902.632	140.999
904.561	138.344
906.491	135.233
908.421	131.984
910.351	129.057
912.281	127.11
914.211	127.124
916.14	130.011
918.07	135.186
920	140.465
921.93	144.266
923.86	146.536
925.789	148.054
927.719	148.927
929.649	149.085
931.579	148.979
933.509	149.024
935.439	148.747
937.368	147.437
939.298	145.037
941.228	140.528
943.158	132.05
945.088	118.89
947.018	104.554
948.947	94.7355
950.877	92.2296
952.807	96.7347
954.737	106.112
956.667	117.093
958.596	126.776
960.526	134.224
962.456	139.565
964.386	143.318
966.316	146.116
968.246	147.707
970.175	148.746
972.105	149.853
974.035	150.195
975.965	150.185
977.895	150.559
979.825	150.293
981.754	149.397
983.684	148.872
985.614	147.919
987.544	145.494
989.474	141.033
991.404	134.708
993.333	127.288
995.263	119.813
997.193	113.901
999.123	111.125
1001.05	112.298
1002.98	116.816
1004.91	123.257
1006.84	129.947
1008.77	134.941
1010.7	137.052
1012.63	135.213
1014.56	129.266
1016.49	121.092
1018.42	112.579
1020.35	105.48
1022.28	101.832
1024.21	102.524
1026.14	106.856
1028.07	113.48
1030	120.795
1031.93	126.814
1033.86	129.677
1035.79	128.233
1037.72	121.281
1039.65	106.772
1041.58	85.2943
1043.51	62.5058
1045.44	44.8573
1047.37	34.9134
1049.3	31.7402
1051.23	33.9284
1053.16	40.8183
1055.09	52.1692
1057.02	67.6441
1058.95	85.526
1060.88	102.775
1062.81	117.001
1064.74	127.625
1066.67	134.709
1068.6	138.641
1070.53	141.74
1072.46	144.144
1074.39	145.116
1076.32	145.626
1078.25	145.855
1080.18	145.683
1082.11	145.419
1084.04	145.53
1085.96	145.891
1087.89	146.452
1089.82	146.641
1091.75	145.907
1093.68	144.312
1095.61	141.882
1097.54	139.819
1099.47	138.315
1101.4	136.632
1103.33	134.709
1105.26	131.068
1107.19	123.447
1109.12	108.849
1111.05	84.9491
1112.98	55.8835
1114.91	32.5187
1116.84	20.1838
1118.77	16.0188
1120.7	16.6569
1122.63	20.6477
1124.56	27.7664
1126.49	38.1841
1128.42	51.3212
1130.35	65.9496
1132.28	81.1722
1134.21	95.8359
1136.14	107.985
1138.07	116.769
1140	123.299
1141.93	127.817
1143.86	130.152
1145.79	131.097
1147.72	131.13
1149.65	131.344
1151.58	132.734
1153.51	134.938
1155.44	137.206
1157.37	139.297
1159.3	141.702
1161.23	143.673
1163.16	144.147
1165.09	144.241
1167.02	144.367
1168.95	143.298
1170.88	140.97
1172.81	137.867
1174.74	133.352
1176.67	128.042
1178.6	123.392
1180.53	119.134
1182.46	115.431
1184.39	112.324
1186.32	109.149
1188.25	106.626
1190.18	104.538
1192.11	101.729
1194.04	99.1313
1195.96	98.9276
1197.89	102.628
1199.82	109.832
1201.75	118.005
1203.68	124.303
1205.61	126.959
1207.54	125.7
1209.47	121.284
1211.4	114.333
1213.33	105.987
1215.26	98.7317
1217.19	94.7747
1219.12	94.438
1221.05	97.2641
1222.98	102.619
1224.91	109.096
1226.84	115.623
1228.77	120.855
1230.7	123.044
1232.63	122.571
1234.56	120.637
1236.49	118.127
1238.42	116.442
1240.35	116.669
1242.28	119.529
1244.21	124.745
1246.14	130.928
1248.07	136.402
1250	140.169
1251.93	142.598
1253.86	144.281
1255.79	145.623
1257.72	146.24
1259.65	146.285
1261.58	146.507
1263.51	146.358
1265.44	145.749
1267.37	145.441
1269.3	145.377
1271.23	144.998
1273.16	143.905
1275.09	142.139
1277.02	139.863
1278.95	136.593
1280.88	131.944
1282.81	126.83
1284.74	123.376
1286.67	123.539
1288.6	127.389
1290.53	132.591
1292.46	136.471
1294.39	138.395
1296.32	138.814
1298.25	137.581
1300.18	133.996
1302.11	127.924
1304.04	120.924
1305.96	115.231
1307.89	112.421
1309.82	113.304
1311.75	117.513
1313.68	123.55
1315.61	129.81
1317.54	135.137
1319.47	139.138
1321.4	142.089
1323.33	143.745
1325.26	143.805
1327.19	142.84
1329.12	141.344
1331.05	140.155
1332.98	140.438
1334.91	142.005
1336.84	144.118
1338.77	146.414
1340.7	148.238
1342.63	149.246
1344.56	149.699
1346.49	150.075
1348.42	150.158
1350.35	149.895
1352.28	149.712
1354.21	149.564
1356.14	149.868
1358.07	150.302
1360	150.145
1361.93	149.74
1363.86	149.526
1365.79	149.547
1367.72	149.484
1369.65	149.366
1371.58	149.659
1373.51	149.865
1375.44	149.65
1377.37	149.698
1379.3	149.818
1381.23	149.894
1383.16	150.306
1385.09	150.674
1387.02	150.556
1388.95	149.96
1390.88	149.719
1392.81	149.91
1394.74	149.166
1396.67	148.263
1398.6	147.934
1400.53	146.881
1402.46	145.262
1404.39	142.816
1406.32	138.46
1408.25	131.668
1410.18	120.403
1412.11	103.063
1414.04	84.0961
1415.96	71.5864
1417.89	69.2368
1419.82	76.2432
1421.75	87.2081
1423.68	92.3387
1425.61	85.1828
1427.54	71.2381
1429.47	61.6927
1431.4	62.8445
1433.33	74.7706
1435.26	90.6995
1437.19	99.6572
1439.12	96.3369
1441.05	87.9876
1442.98	82.1575
1444.91	80.9994
1446.84	81.5921
1448.77	81.4154
1450.7	80.3902
1452.63	79.1105
1454.56	77.7635
1456.49	75.217
1458.42	71.6258
1460.35	68.132
1462.28	63.0516
1464.21	55.1478
1466.14	45.8837
1468.07	38.7698
1470	35.3557
1471.93	35.2923
1473.86	37.232
1475.79	38.7864
1477.72	40.02
1479.65	44.1388
1481.58	54.3217
1483.51	71.1094
1485.44	90.4891
1487.37	106.804
1489.3	117.461
1491.23	124.168
1493.16	129.128
1495.09	132.653
1497.02	134.426
1498.95	135.857
1500.88	137.803
1502.81	140.038
1504.74	141.74
1506.67	141.242
1508.6	140.892
1510.53	142.702
1512.46	144.265
1514.39	145.481
1516.32	146.191
1518.25	146.484
1520.18	146.744
1522.11	145.888
1524.04	145.948
1525.96	146.872
1527.89	147.033
1529.82	147.353
1531.75	148.05
1533.68	147.769
1535.61	147.589
1537.54	148.688
1539.47	148.209
1541.4	146.87
1543.33	147.469
1545.26	148.41
1547.19	148.97
1549.12	149.153
1551.05	149.25
1552.98	149.467
1554.91	149.534
1556.84	150.033
1558.77	148.886
1560.7	146.744
1562.63	147.666
1564.56	148.706
1566.49	148.493
1568.42	148.051
1570.35	146.54
1572.28	145.357
1574.21	144.996
1576.14	142.092
1578.07	137.719
1580	134.267
1581.93	128.888
1583.86	121.788
1585.79	115.602
1587.72	112.303
1589.65	112.68
1591.58	115.508
1593.51	119.223
1595.44	122.579
1597.37	125.387
1599.3	128.336
1601.23	132.016
1603.16	136.151
1605.09	139.739
1607.02	142.501
1608.95	144.425
1610.88	145.816
1612.81	147.179
1614.74	148.405
1616.67	148.061
1618.6	147.109
1620.53	148.111
1622.46	148.848
1624.39	148.398
1626.32	148.526
1628.25	149.052
1630.18	149.474
1632.11	149.866
1634.04	149.84
1635.96	148.453
1637.89	147.632
1639.82	148.36
1641.75	148.817
1643.68	149.323
1645.61	149.364
1647.54	148.123
1649.47	148.631
1651.4	150.514
1653.33	149.111
1655.26	147.287
1657.19	148.5
1659.12	149.317
1661.05	149.477
1662.98	149.36
1664.91	149.225
1666.84	149.797
1668.77	150.127
1670.7	149.464
1672.63	149.394
1674.56	149.71
1676.49	149.268
1678.42	149.621
1680.35	150.406
1682.28	151.203
1684.21	150.392
1686.14	148.367
1688.07	149.12
1690	150.094
1691.93	150.279
1693.86	151.31
1695.79	150.858
1697.72	149.861
1699.65	149.811
1701.58	148.552
1703.51	148.971
1705.44	150.139
1707.37	149.879
1709.3	149.626
1711.23	149.456
1713.16	148.954
1715.09	148.458
1717.02	147.241
1718.95	145.233
1720.88	145.02
1722.81	145.698
1724.74	145.734
1726.67	145.895
1728.6	146.571
1730.53	148.201
1732.46	150.545
1734.39	151.27
1736.32	151.65
1738.25	153.442
1740.18	153.896
1742.11	153.147
1744.04	152.625
1745.96	151.794
1747.89	151.026
1749.82	150.63
1751.75	149.661
1753.68	149.348
1755.61	150.148
1757.54	150.155
1759.47	150.041
1761.4	149.956
1763.33	149.471
1765.26	149.601
1767.19	149.686
1769.12	149.627
1771.05	149.908
1772.98	149.281
1774.91	148.846
1776.84	149.564
1778.77	149.984
1780.7	149.925
1782.63	149.678
1784.56	149.271
1786.49	149.129
1788.42	149.707
1790.35	150.342
1792.28	149.913
1794.21	149.208
1796.14	149.375
1798.07	149.775
1800	149.923
1801.93	149.675
1803.86	149.401
1805.79	149.517
1807.72	149.612
1809.65	149.484
1811.58	149.163
1813.51	149.194
1815.44	149.58
1817.37	149.461
1819.3	149.216
1821.23	149.207
1823.16	149.223
1825.09	149.024
1827.02	148.98
1828.95	149.465
1830.88	149.349
1832.81	148.972
1834.74	149.16
1836.67	149.42
1838.6	149.422
1840.53	149.306
1842.46	149.308
1844.39	148.708
1846.32	148.407
1848.25	149.028
1850.18	149.132
1852.11	149.07
1854.04	149.237
1855.96	149.189
1857.89	149.141
1859.82	149.26
1861.75	149.215
1863.68	149.127
1865.61	149.324
1867.54	149.274
1869.47	148.717
1871.4	148.464
1873.33	148.462
1875.26	148.366
1877.19	148.485
1879.12	148.518
1881.05	148.425
1882.98	148.531
1884.91	148.732
1886.84	148.928
1888.77	149.096
1890.7	148.83
1892.63	148.541
1894.56	148.738
1896.49	148.655
1898.42	148.533
1900.35	148.864
1902.28	148.796
1904.21	148.446
1906.14	148.536
1908.07	148.694
1910	148.738
1911.93	148.822
1913.86	148.58
1915.79	148.425
1917.72	148.222
1919.65	147.95
1921.58	148.056
1923.51	147.574
1925.44	147.048
1927.37	147.202
1929.3	147.426
1931.23	147.418
1933.16	147.145
1935.09	147.053
1937.02	147.238
1938.95	147.32
1940.88	147.478
1942.81	147.791
1944.74	147.855
1946.67	147.838
1948.6	147.812
1950.53	147.652
1952.46	147.64
1954.39	147.81
1956.32	147.911
1958.25	147.906
1960.18	148.152
1962.11	148.525
1964.04	148.37
1965.96	148.153
1967.89	148.686
1969.82	149.241
1971.75	148.927
1973.68	148.502
1975.61	148.595
1977.54	148.601
1979.47	148.511
1981.4	148.871
1983.33	149.195
1985.26	149.159
1987.19	149.205
1989.12	149.429
1991.05	149.733
1992.98	149.894
1994.91	149.84
1996.84	149.544
1998.77	149.331
2000.7	149.462
2002.63	149.584
2004.56	149.755
2006.49	149.961
2008.42	149.876
2010.35	149.545
2012.28	149.406
2014.21	149.895
2016.14	150.183
2018.07	149.927
2020	150.043
2021.93	150.125
2023.86	149.981
2025.79	149.818
2027.72	149.728
2029.65	149.942
2031.58	149.985
2033.51	149.951
2035.44	149.87
2037.37	149.818
2039.3	149.934
2041.23	149.741
2043.16	149.63
2045.09	149.74
2047.02	149.794
2048.95	150.131
2050.88	150.39
2052.81	150.095
2054.74	149.935
2056.67	150.171
2058.6	150.074
2060.53	149.938
2062.46	150.135
2064.39	150.257
2066.32	150.35
2068.25	150.318
2070.18	150.066
2072.11	150.008
2074.04	150.579
2075.96	150.897
2077.89	150.351
2079.82	150.179
2081.75	150.545
2083.68	150.727
2085.61	150.675
2087.54	150.718
2089.47	151.095
2091.4	151.218
2093.33	151.031
2095.26	150.989
2097.19	150.899
2099.12	150.881
2101.05	151.062
2102.98	151.001
2104.91	150.91
2106.84	150.671
2108.77	149.923
2110.7	149.871
2112.63	150.672
2114.56	151.112
2116.49	150.887
2118.42	150.401
2120.35	150.343
2122.28	150.637
2124.21	150.567
2126.14	150.38
2128.07	150.317
2130	149.648
2131.93	149.281
2133.86	149.679
2135.79	149.673
2137.72	149.38
2139.65	149.317
2141.58	149.202
2143.51	148.543
2145.44	148.259
2147.37	148.863
2149.3	148.957
2151.23	148.527
2153.16	148.817
2155.09	149.402
2157.02	149.442
2158.95	149.501
2160.88	149.798
2162.81	149.712
2164.74	149.344
2166.67	148.933
2168.6	148.411
2170.53	148.358
2172.46	148.907
2174.39	149.487
2176.32	150.011
2178.25	150.327
2180.18	150.141
2182.11	149.896
2184.04	150.099
2185.96	150.065
2187.89	149.563
2189.82	149.745
2191.75	150.138
2193.68	150.056
2195.61	149.784
2197.54	149.398
2199.47	149.223
2201.4	149.427
2203.33	150.08
2205.26	150.378
2207.19	150.055
2209.12	149.556
2211.05	149.61
2212.98	150.454
2214.91	150.668
2216.84	150.404
2218.77	150.371
2220.7	150.064
2222.63	149.828
2224.56	150.044
2226.49	150.367
2228.42	150.334
2230.35	150.089
2232.28	150.18
2234.21	150.312
2236.14	150.077
2238.07	149.967
2240	150.189
2241.93	149.957
2243.86	149.525
2245.79	149.729
2247.72	149.817
2249.65	149.402
2251.58	149.689
2253.51	150.048
2255.44	149.193
2257.37	148.703
2259.3	149.492
2261.23	150.129
2263.16	150.151
2265.09	149.931
2267.02	149.719
2268.95	149.665
2270.88	149.849
2272.81	150.24
2274.74	150.526
2276.67	150.913
2278.6	150.728
2280.53	149.992
2282.46	149.957
2284.39	150.084
2286.32	149.768
2288.25	149.434
2290.18	149.224
2292.11	149.385
2294.04	149.927
2295.96	150.027
2297.89	149.694
2299.82	149.45
2301.75	149.045
2303.68	148.817
2305.61	149.356
2307.54	149.766
2309.47	149.732
2311.4	149.791
2313.33	149.328
2315.26	148.812
2317.19	149.296
2319.12	149.881
2321.05	149.941
2322.98	150.358
2324.91	150.637
2326.84	149.763
2328.77	149.12
2330.7	149.44
2332.63	149.752
2334.56	149.529
2336.49	149.39
2338.42	149.584
2340.35	149.299
2342.28	149.635
2344.21	150.621
2346.14	150.316
2348.07	149.216
2350	149.1
2351.93	149.713
2353.86	150.292
2355.79	150.886
2357.72	150.417
2359.65	149.232
2361.58	149.173
2363.51	149.796
2365.44	149.95
2367.37	149.492
2369.3	148.874
2371.23	148.807
2373.16	149.225
2375.09	149.201
2377.02	149.046
2378.95	149.577
2380.88	149.319
2382.81	148.523
2384.74	149.254
2386.67	149.923
2388.6	149.054
2390.53	148.786
2392.46	149.387
2394.39	149.652
2396.32	149.694
2398.25	149.446
2400.18	149.091
2402.11	149.124
2404.04	149.769
2405.96	149.602
2407.89	148.902
2409.82	149.186
2411.75	149.233
2413.68	149.187
2415.61	149.059
2417.54	148.539
2419.47	148.789
2421.4	149.201
2423.33	149.566
2425.26	149.797
2427.19	149.239
2429.12	148.603
2431.05	148.333
2432.98	148.618
2434.91	148.882
2436.84	148.723
2438.77	148.921
2440.7	149.258
2442.63	149.891
2444.56	150.46
2446.49	150.337
2448.42	150.465
2450.35	150.681
2452.28	150.831
2454.21	150.672
2456.14	149.774
2458.07	149.406
2460	149.671
2461.93	149.658
2463.86	149.631
2465.79	150.477
2467.72	151.234
2469.65	150.922
2471.58	150.437
2473.51	150.026
2475.44	149.537
2477.37	148.802
2479.3	148.835
2481.23	149.727
2483.16	150.509
2485.09	150.533
2487.02	149.659
2488.95	149.532
2490.88	150.221
2492.81	150.297
2494.74	149.664
2496.67	149.4
2498.6	149.708
2500.53	149.988
2502.46	150.521
2504.39	150.147
2506.32	148.418
2508.25	148.328
2510.18	149.137
2512.11	148.62
2514.04	148.35
2515.96	148.559
2517.89	148.856
2519.82	149.263
2521.75	149.726
2523.68	150.569
2525.61	150.815
2527.54	150.159
2529.47	149.724
2531.4	149.245
2533.33	148.6
2535.26	148.928
2537.19	149.701
2539.12	150.119
2541.05	150.269
2542.98	149.752
2544.91	149.072
2546.84	149.238
2548.77	149.816
2550.7	149.364
2552.63	148.664
2554.56	149.791
2556.49	150.977
2558.42	150.194
2560.35	149.454
2562.28	149.865
2564.21	150.485
2566.14	150.564
2568.07	149.81
2570	148.83
2571.93	148.637
2573.86	148.61
2575.79	148.821
2577.72	149.594
2579.65	149.418
2581.58	149.158
2583.51	149.21
2585.44	148.369
2587.37	147.378
2589.3	146.838
2591.23	147.484
2593.16	149.384
2595.09	149.314
2597.02	147.661
2598.95	147.411
2600.88	147.997
2602.81	148.671
2604.74	149.055
2606.67	149.249
2608.6	148.752
2610.53	148.13
2612.46	148.607
2614.39	148.642
2616.32	148.029
2618.25	147.981
2620.18	148.412
2622.11	148.971
2624.04	149.011
2625.96	148.334
2627.89	147.905
2629.82	147.998
2631.75	148.708
2633.68	149.683
2635.61	149.67
2637.54	149.36
2639.47	148.722
2641.4	147.653
2643.33	147.897
2645.26	148.815
2647.19	149.61
2649.12	149.533
2651.05	148.897
2652.98	148.776
2654.91	148.583
2656.84	148.654
2658.77	148.188
2660.7	147.815
2662.63	148.789
2664.56	149.039
2666.49	148.454
2668.42	148.607
2670.35	149.262
2672.28	149.303
2674.21	148.369
2676.14	147.956
2678.07	147.891
2680	147.742
2681.93	148.576
2683.86	148.985
2685.79	148.876
2687.72	149.975
2689.65	150.739
2691.58	149.769
2693.51	147.958
2695.44	147.216
2697.37	147.998
2699.3	148.787
2701.23	148.849
2703.16	148.251
2705.09	147.779
2707.02	147.895
2708.95	147.881
2710.88	147.836
2712.81	148.563
2714.74	148.471
2716.67	147.212
2718.6	147.037
2720.53	147.902
2722.46	148.396
2724.39	147.794
2726.32	147.555
2728.25	148.83
2730.18	149.482
2732.11	149.195
2734.04	149.229
2735.96	148.507
2737.89	148.071
2739.82	148.714
2741.75	148.347
2743.68	147.451
2745.61	147.474
2747.54	149.104
2749.47	150.431
2751.4	149.567
2753.33	147.468
2755.26	145.91
2757.19	147.511
2759.12	149.095
2761.05	148.265
2762.98	148.311
2764.91	148.285
2766.84	147.478
2768.77	147.488
2770.7	147.361
2772.63	147.541
2774.56	148.255
2776.49	148.181
2778.42	148.687
2780.35	149.638
2782.28	149.682
2784.21	149.488
2786.14	148.109
2788.07	147.251
2790	149.449
2791.93	150.904
2793.86	149.902
2795.79	148.47
2797.72	148.141
2799.65	149.816
2801.58	150.762
2803.51	150.091
2805.44	150.622
2807.37	150.588
2809.3	148.795
2811.23	147.329
2813.16	146.448
2815.09	145.332
2817.02	143.139
2818.95	139.589
2820.88	136.322
2822.81	135.319
2824.74	134.942
2826.67	134.671
2828.6	134.85
2830.53	133.684
2832.46	132.652
2834.39	132.573
2836.32	131.944
2838.25	132.211
2840.18	134.392
2842.11	136.437
2844.04	138.407
2845.96	139.99
2847.89	140.109
2849.82	141.132
2851.75	143.307
2853.68	143.934
2855.61	143.185
2857.54	144.37
2859.47	144.586
2861.4	141.774
2863.33	139.712
2865.26	138.811
2867.19	139.556
2869.12	139.134
2871.05	136.773
2872.98	137.009
2874.91	137.211
2876.84	136.054
2878.77	137.018
2880.7	138.685
2882.63	137.628
2884.56	136.359
2886.49	137.047
2888.42	136.709
2890.35	135.325
2892.28	134.764
2894.21	135.961
2896.14	137.744
2898.07	137.409
2900	135.201
2901.93	134.195
2903.86	135.146
2905.79	135.591
2907.72	135.062
2909.65	134.57
2911.58	135.431
2913.51	136.739
2915.44	136.086
2917.37	134.637
2919.3	134.485
2921.23	134.856
2923.16	132.483
2925.09	128.757
2927.02	125.482
2928.95	121.918
2930.88	119.169
2932.81	115.142
2934.74	111.844
2936.67	111.587
2938.6	110.967
2940.53	111.171
2942.46	113.286
2944.39	116.877
2946.32	120.747
2948.25	122.632
2950.18	124.42
2952.11	126.42
2954.04	128.359
2955.96	129.838
2957.89	129.785
2959.82	128.613
2961.75	126.591
2963.68	126.179
2965.61	127.262
2967.54	128.185
2969.47	127.465
2971.4	125.454
2973.33	125.215
2975.26	125.279
2977.19	123.993
2979.12	123.455
2981.05	124.528
2982.98	126.031
2984.91	126.249
2986.84	125.304
2988.77	124.79
2990.7	124.063
2992.63	122.855
2994.56	123.068
2996.49	124.541
2998.42	124.063
3000.35	123.062
3002.28	124.606
3004.21	125.522
3006.14	125.237
3008.07	126.871
3010	129.103
3011.93	130.944
3013.86	134.011
3015.79	137.525
3017.72	139.987
3019.65	139.951
3021.58	138.886
3023.51	140.726
3025.44	142.874
3027.37	142.677
3029.3	143.637
3031.23	145.475
3033.16	146.136
3035.09	146.767
3037.02	147.526
3038.95	147.92
3040.88	146.984
3042.81	146.374
3044.74	148.222
3046.67	148.96
3048.6	148.459
3050.53	148.942
3052.46	149.661
3054.39	151.293
3056.32	153
3058.25	152.546
3060.18	151.364
3062.11	151.988
3064.04	152.372
3065.96	151.129
3067.89	150.714
3069.82	151.3
3071.75	151.224
3073.68	152.471
3075.61	154.101
3077.54	153.375
3079.47	151.298
3081.4	149.302
3083.33	148.934
3085.26	149.761
3087.19	149.992
3089.12	149.535
3091.05	148.172
3092.98	145.824
3094.91	144.592
3096.84	146.496
3098.77	148.655
3100.7	147.809
3102.63	146.97
3104.56	146.676
3106.49	147.13
3108.42	149.678
3110.35	151.252
3112.28	150.627
3114.21	150.255
3116.14	148.694
3118.07	146.03
3120	146.57
3121.93	148.016
3123.86	148.042
3125.79	148.042
3127.72	149.123
3129.65	149.734
3131.58	147.865
3133.51	147.824
3135.44	150.118
3137.37	149.081
3139.3	147.804
3141.23	149.256
3143.16	149.083
3145.09	148.514
3147.02	150.268
3148.95	150.696
3150.88	148.471
3152.81	149.513
3154.74	152.317
3156.67	151.718
3158.6	150.388
3160.53	149.402
3162.46	148.596
3164.39	148.899
3166.32	148.933
3168.25	150.151
3170.18	153.157
3172.11	152.831
3174.04	150.276
3175.96	147.985
3177.89	146.488
3179.82	147.662
3181.75	148.853
3183.68	150.019
3185.61	152.838
3187.54	156.398
3189.47	155.894
3191.4	149.315
3193.33	144.795
3195.26	144.817
3197.19	146.663
3199.12	150.51
3201.05	152.71
3202.98	152.145
3204.91	151.957
3206.84	151.098
3208.77	150.786
3210.7	150.273
3212.63	148.237
3214.56	150.232
3216.49	153.222
3218.42	151.296
3220.35	150.521
3222.28	150.654
3224.21	150.857
3226.14	152.193
3228.07	149.329
3230	145.613
3231.93	146.419
3233.86	148.496
3235.79	148.215
3237.72	147.148
3239.65	148.268
3241.58	151.076
3243.51	152.186
3245.44	153.742
3247.37	156.304
3249.3	154.884
3251.23	151.382
3253.16	150.732
3255.09	151.093
3257.02	151.699
3258.95	153.979
3260.88	154.932
3262.81	153.038
3264.74	149.788
3266.67	148.68
3268.6	149.655
3270.53	149.642
3272.46	150.645
3274.39	151.946
3276.32	151.736
3278.25	152.349
3280.18	153.337
3282.11	152.366
3284.04	150.478
3285.96	150.046
3287.89	150.335
3289.82	150.01
3291.75	148.94
3293.68	149.306
3295.61	151.442
3297.54	152.995
3299.47	152.038
3301.4	148.976
3303.33	148.686
3305.26	149.549
3307.19	150.128
3309.12	151.726
3311.05	150.59
3312.98	149.365
3314.91	149.527
3316.84	149.436
3318.77	148.039
3320.7	146.222
3322.63	145.542
3324.56	147.553
3326.49	152.367
3328.42	152.649
3330.35	150.587
3332.28	150.179
3334.21	150.161
3336.14	151.624
3338.07	151.037
3340	149.628
3341.93	152.322
3343.86	153.918
3345.79	151.926
3347.72	149.778
3349.65	148.379
3351.58	150.557
3353.51	153.563
3355.44	152.188
3357.37	150.613
3359.3	151.747
3361.23	151.973
3363.16	149.714
3365.09	148.414
3367.02	149.551
3368.95	150.631
3370.88	149.626
3372.81	149.817
3374.74	152.244
3376.67	153.107
3378.6	154.092
3380.53	152.908
3382.46	147.493
3384.39	144.15
3386.32	143.602
3388.25	146.306
3390.18	151.2
3392.11	152.874
3394.04	152.065
3395.96	150.928
3397.89	149.551
3399.82	147.191
3401.75	147.894
3403.68	151.907
3405.61	151.204
3407.54	148.495
3409.47	150.129
3411.4	152.849
3413.33	152.276
3415.26	150.797
3417.19	149.43
3419.12	146.527
3421.05	145.486
3422.98	148.061
3424.91	149.304
3426.84	147.591
3428.77	146.588
3430.7	145.989
3432.63	146.469
3434.56	148.091
3436.49	147.866
3438.42	146.844
3440.35	146.524
3442.28	146.968
3444.21	147.65
3446.14	148.651
3448.07	150.21
3450	149.867
3451.93	149.822
3453.86	150.399
3455.79	148.434
3457.72	145.235
3459.65	145.605
3461.58	149.572
3463.51	148.579
3465.44	144.782
3467.37	147.787
3469.3	153.412
3471.23	152.666
3473.16	149.827
3475.09	149.363
3477.02	149.721
3478.95	151.137
3480.88	151.843
3482.81	150.707
3484.74	150.537
3486.67	151.334
3488.6	151.9
3490.53	150.42
3492.46	145.943
3494.39	145.61
3496.32	149.459
3498.25	150.083
3500.18	148.185
3502.11	149.91
3504.04	153.491
3505.96	153.488
3507.89	153.138
3509.82	155.969
3511.75	156.001
3513.68	152.224
3515.61	151.885
3517.54	151.552
3519.47	151.265
3521.4	154.524
3523.33	156.331
3525.26	154.756
3527.19	152.941
3529.12	153.002
3531.05	151.093
3532.98	147.616
3534.91	149.877
3536.84	153.549
3538.77	154.298
3540.7	155.456
3542.63	154.908
3544.56	151.755
3546.49	150.45
3548.42	150.075
3550.35	148.908
3552.28	151.065
3554.21	154.569
3556.14	154.883
3558.07	152.474
3560	150.043
3561.93	150.062
3563.86	152.884
3565.79	154.999
3567.72	152.375
3569.65	148.453
3571.58	149.237
3573.51	150.446
3575.44	150.394
3577.37	152.891
3579.3	151.441
3581.23	149.079
3583.16	151.385
3585.09	154.603
3587.02	158.601
3588.95	158.3
3590.88	151.68
3592.81	147.711
3594.74	149.458
3596.67	151.616
3598.6	151.394
3600.53	151.448
3602.46	151.289
3604.39	151.609
3606.32	153.111
3608.25	153.391
3610.18	151.69
3612.11	152.611
3614.04	155.006
3615.96	152.101
3617.89	150.566
3619.82	152.212
3621.75	151.502
3623.68	150.269
3625.61	150.077
3627.54	153.585
3629.47	157.617
3631.4	151.427
3633.33	144.603
3635.26	143.925
3637.19	145.965
3639.12	148.94
3641.05	149.889
3642.98	150.044
3644.91	150.969
3646.84	151.975
3648.77	152.741
3650.7	153.024
3652.63	149.829
3654.56	146.558
3656.49	147.626
3658.42	149.556
3660.35	148.063
3662.28	145.125
3664.21	144.894
3666.14	147.644
3668.07	149.857
3670	153.406
3671.93	153.575
3673.86	150.201
3675.79	155.387
3677.72	157.132
3679.65	151.273
3681.58	150.538
3683.51	150.403
3685.44	149.643
3687.37	152.579
3689.3	157.366
3691.23	156.88
3693.16	152.44
3695.09	149.55
3697.02	148.596
3698.95	148.427
3700.88	149.9
3702.81	151.403
3704.74	149.687
3706.67	150.124
3708.6	151.997
3710.53	151.385
3712.46	151.658
3714.39	150.229
3716.32	147.759
3718.25	146.391
3720.18	145.033
3722.11	146.873
3724.04	149.329
3725.96	148.249
3727.89	147.104
3729.82	147.795
3731.75	149.881
3733.68	150.016
3735.61	151.195
3737.54	154.804
3739.47	153.218
3741.4	151.428
3743.33	155.842
3745.26	160.503
3747.19	154.398
3749.12	152.731
3751.05	157.129
3752.98	152.744
3754.91	147.013
3756.84	149.151
3758.77	153.454
3760.7	153.433
3762.63	151.132
3764.56	151.541
3766.49	151.345
3768.42	150.925
3770.35	152.334
3772.28	151.786
3774.21	151.32
3776.14	150.595
3778.07	150.381
3780	151.721
3781.93	151.405
3783.86	151.794
3785.79	152.713
3787.72	150.214
3789.65	147.814
3791.58	148.988
3793.51	150.205
3795.44	149.539
3797.37	148.295
3799.3	150.162
3801.23	154.129
3803.16	151.568
3805.09	148.252
3807.02	150.522
3808.95	148.02
3810.88	145.083
3812.81	146.285
3814.74	149.804
3816.67	155.016
3818.6	151.059
3820.53	147.982
3822.46	152.341
3824.39	151.343
3826.32	150.451
3828.25	152.989
3830.18	152.228
3832.11	151.45
3834.04	151.196
3835.96	149.437
3837.89	149.546
3839.82	150.154
3841.75	147.926
3843.68	148.636
3845.61	150.322
3847.54	148.883
3849.47	148.67
3851.4	150.18
3853.33	155.495
3855.26	157.12
3857.19	148.696
3859.12	145.133
3861.05	146.246
3862.98	148.928
3864.91	149.847
3866.84	148.137
3868.77	151.604
3870.7	155.688
3872.63	150.446
3874.56	146.648
3876.49	145.998
3878.42	144.062
3880.35	144.972
3882.28	146.787
3884.21	146.213
3886.14	145.226
3888.07	145.184
3890	146.158
3891.93	146.695
3893.86	144.999
3895.79	144.554
3897.72	145.974
3899.65	148.308
3901.58	150.808
3903.51	152.037
3905.44	151.173
3907.37	147.549
3909.3	145.802
3911.23	145.979
3913.16	146.231
3915.09	148.48
3917.02	150.469
3918.95	150.152
3920.88	148.879
3922.81	148.87
3924.74	149.641
3926.67	148.244
3928.6	146.977
3930.53	147.531
3932.46	147.928
3934.39	146.774
3936.32	145.872
3938.25	146.501
3940.18	146.885
3942.11	147.694
3944.04	147.828
3945.96	146.252
3947.89	147.461
3949.82	152.049
3951.75	154.147
3953.68	152.918
3955.61	151.808
3957.54	151.078
3959.47	151.645
3961.4	152.473
3963.33	150.308
3965.26	148.725
3967.19	148.619
3969.12	148.606
3971.05	151.377
3972.98	154.103
3974.91	154.407
3976.84	153.758
3978.77	153.036
3980.7	153.466
3982.63	154.554
3984.56	153.771
3986.49	150.342
3988.42	148.024
3990.35	150.108
3992.28	153.817
3994.21	154.985
3996.14	155.356
3998.07	157.568
4000	159.817

## Sheet: 10
wavenumber	Transmission
700	98.1225
701.93	97.8565
703.86	98.2745
705.789	98.6534
707.719	98.8774
709.649	99.0835
711.579	99.2416
713.509	99.4722
715.439	99.672
717.368	99.8101
719.298	99.8512
721.228	99.849
723.158	99.8093
725.088	99.7839
727.018	99.7285
728.947	99.6831
730.877	99.5977
732.807	99.5255
734.737	99.437
736.667	99.363
738.596	99.247
740.526	99.1091
742.456	98.9045
744.386	98.6671
746.316	98.3492
748.246	97.9798
750.175	97.5021
752.105	96.9283
754.035	96.1897
755.965	95.3217
757.895	94.3247
759.825	93.3232
761.754	92.3697
763.684	91.4549
765.614	90.3373
767.544	88.8504
769.474	86.9737
771.404	85.1294
773.333	83.9368
775.263	83.9774
777.193	85.3967
779.123	88.0054
781.053	91.1441
782.982	94.0072
784.912	96.0157
786.842	97.2196
788.772	97.8624
790.702	98.2121
792.632	98.3413
794.561	98.3372
796.491	98.1874
798.421	97.924
800.351	97.4754
802.281	96.8496
804.211	96.0176
806.14	95.0626
808.07	93.9953
810	92.9038
811.93	91.8304
813.86	90.8805
815.789	90.0263
817.719	89.261
819.649	88.497
821.579	87.6912
823.509	86.6792
825.439	85.2809
827.368	83.2279
829.298	80.4988
831.228	77.317
833.158	74.1924
835.088	71.6691
837.018	70.322
838.947	70.5461
840.877	72.5903
842.807	76.3201
844.737	81.1598
846.667	86.0633
848.596	90.1185
850.526	92.9243
852.456	94.723
854.386	95.8642
856.316	96.6564
858.246	97.2167
860.175	97.6728
862.105	98.0329
864.035	98.3417
865.965	98.5635
867.895	98.7428
869.825	98.8557
871.754	98.9493
873.684	98.9929
875.614	99.0274
877.544	99.0265
879.474	99.0312
881.404	99.0036
883.333	98.979
885.263	98.9203
887.193	98.853
889.123	98.7228
891.053	98.544
892.982	98.2475
894.912	97.819
896.842	97.1879
898.772	96.3876
900.702	95.3983
902.632	94.2668
904.561	92.9795
906.491	91.6249
908.421	90.2906
910.351	89.2027
912.281	88.5887
914.211	88.7739
916.14	89.8902
918.07	91.7513
920	93.7542
921.93	95.3976
923.86	96.4631
925.789	97.0797
927.719	97.376
929.649	97.4881
931.579	97.4148
933.509	97.1877
935.439	96.7338
937.368	95.9669
939.298	94.6099
941.228	92.2758
943.158	88.4521
945.088	83.1381
947.018	77.3448
948.947	73.0023
950.877	71.6437
952.807	73.5201
954.737	77.562
956.667	82.3088
958.596	86.6478
960.526	90.1423
962.456	92.6978
964.386	94.4704
966.316	95.6337
968.246	96.4153
970.175	96.9248
972.105	97.2716
974.035	97.4606
975.965	97.5455
977.895	97.5128
979.825	97.3865
981.754	97.0964
983.684	96.6182
985.614	95.83
987.544	94.5928
989.474	92.6731
991.404	90.0365
993.333	86.8931
995.263	83.8009
997.193	81.3895
999.123	80.2503
1001.05	80.6251
1002.98	82.3769
1004.91	84.9049
1006.84	87.4307
1008.77	89.1843
1010.7	89.7294
1012.63	88.8787
1014.56	86.7222
1016.49	83.5438
1018.42	80.0186
1020.35	77.0293
1022.28	75.4289
1024.21	75.5839
1026.14	77.333
1028.07	80.0184
1030	82.8212
1031.93	84.906
1033.86	85.6537
1035.79	84.5221
1037.72	81.0184
1039.65	74.677
1041.58	65.5925
1043.51	54.8405
1045.44	44.4608
1047.37	36.5233
1049.3	32.3065
1051.23	32.1049
1053.16	35.6552
1055.09	42.3662
1057.02	51.4092
1058.95	61.5948
1060.88	71.4357
1062.81	79.5839
1064.74	85.5172
1066.67	89.4635
1068.6	92.0208
1070.53	93.6822
1072.46	94.8181
1074.39	95.6061
1076.32	96.1848
1078.25	96.5759
1080.18	96.8246
1082.11	96.9292
1084.04	96.9444
1085.96	96.8365
1087.89	96.5879
1089.82	96.1392
1091.75	95.4558
1093.68	94.4657
1095.61	93.2647
1097.54	92.0005
1099.47	90.8158
1101.4	89.5467
1103.33	87.849
1105.26	85.1869
1107.19	80.8475
1109.12	73.8886
1111.05	63.5459
1112.98	50.2121
1114.91	36.1118
1116.84	24.4517
1118.77	17.5745
1120.7	15.5735
1122.63	17.4923
1124.56	22.3159
1126.49	29.1459
1128.42	37.4711
1130.35	46.7813
1132.28	56.3016
1134.21	65.2571
1136.14	72.9157
1138.07	78.8822
1140	83.0815
1141.93	85.775
1143.86	87.3559
1145.79	88.2525
1147.72	88.836
1149.65	89.4276
1151.58	90.184
1153.51	91.1766
1155.44	92.3029
1157.37	93.4432
1159.3	94.435
1161.23	95.1933
1163.16	95.647
1165.09	95.7939
1167.02	95.5755
1168.95	94.9207
1170.88	93.7139
1172.81	91.9477
1174.74	89.7211
1176.67	87.3501
1178.6	85.0919
1180.53	83.0153
1182.46	81.0391
1184.39	79.2247
1186.32	77.6811
1188.25	76.3964
1190.18	75.14
1192.11	73.8348
1194.04	72.8569
1195.96	73.0099
1197.89	74.8284
1199.82	78.0311
1201.75	81.5311
1203.68	84.1779
1205.61	85.2797
1207.54	84.7068
1209.47	82.6299
1211.4	79.48
1213.33	75.8985
1215.26	72.7476
1217.19	70.8007
1219.12	70.5084
1221.05	71.8426
1222.98	74.4193
1224.91	77.5925
1226.84	80.6754
1228.77	83.0572
1230.7	84.3821
1232.63	84.5642
1234.56	83.8821
1236.49	82.868
1238.42	82.2012
1240.35	82.457
1242.28	83.9551
1244.21	86.5113
1246.14	89.5139
1248.07	92.2428
1250	94.3406
1251.93	95.7937
1253.86	96.7664
1255.79	97.3848
1257.72	97.7675
1259.65	97.962
1261.58	98.0169
1263.51	97.9474
1265.44	97.7908
1267.37	97.5343
1269.3	97.1758
1271.23	96.6728
1273.16	96.0033
1275.09	95.1065
1277.02	93.9172
1278.95	92.308
1280.88	90.3059
1282.81	88.3169
1284.74	87.1262
1286.67	87.3001
1288.6	88.7287
1290.53	90.6694
1292.46	92.3385
1294.39	93.2632
1296.32	93.3011
1298.25	92.3762
1300.18	90.4635
1302.11	87.7172
1304.04	84.6949
1305.96	82.2112
1307.89	81.0272
1309.82	81.4835
1311.75	83.4249
1313.68	86.2544
1315.61	89.2399
1317.54	91.8111
1319.47	93.7575
1321.4	95.0768
1323.33	95.8253
1325.26	95.9962
1327.19	95.6687
1329.12	95.1218
1331.05	94.7999
1332.98	94.9776
1334.91	95.6428
1336.84	96.5572
1338.77	97.4696
1340.7	98.1925
1342.63	98.6881
1344.56	98.9924
1346.49	99.1769
1348.42	99.2736
1350.35	99.3203
1352.28	99.3235
1354.21	99.2991
1356.14	99.2467
1358.07	99.1871
1360	99.1167
1361.93	99.0478
1363.86	98.9768
1365.79	98.912
1367.72	98.8438
1369.65	98.7848
1371.58	98.7264
1373.51	98.6745
1375.44	98.6227
1377.37	98.5746
1379.3	98.5135
1381.23	98.4489
1383.16	98.3751
1385.09	98.2924
1387.02	98.1892
1388.95	98.0653
1390.88	97.8903
1392.81	97.6451
1394.74	97.3085
1396.67	96.8659
1398.6	96.2615
1400.53	95.443
1402.46	94.3186
1404.39	92.7124
1406.32	90.3115
1408.25	86.6622
1410.18	81.2467
1412.11	74.087
1414.04	66.5137
1415.96	60.9743
1417.89	59.3876
1419.82	61.565
1421.75	64.9446
1423.68	66.2094
1425.61	63.7634
1427.54	58.9724
1429.47	55.2941
1431.4	55.5987
1433.33	60.0316
1435.26	65.886
1437.19	69.4504
1439.12	69.076
1441.05	66.3271
1442.98	63.8264
1444.91	62.6872
1446.84	62.3805
1448.77	62.0872
1450.7	61.5214
1452.63	60.7408
1454.56	59.788
1456.49	58.5903
1458.42	57.0273
1460.35	54.915
1462.28	51.9916
1464.21	48.1545
1466.14	43.8589
1468.07	40.0521
1470	37.5999
1471.93	36.7403
1473.86	36.9638
1475.79	37.5367
1477.72	38.5351
1479.65	41.1721
1481.58	46.7726
1483.51	55.3789
1485.44	65.2381
1487.37	74.0194
1489.3	80.5496
1491.23	84.9618
1493.16	87.8806
1495.09	89.8722
1497.02	91.3092
1498.95	92.4008
1500.88	93.2662
1502.81	93.9876
1504.74	94.6237
1506.67	95.201
1508.6	95.7286
1510.53	96.2084
1512.46	96.6448
1514.39	97.0314
1516.32	97.3611
1518.25	97.6332
1520.18	97.844
1522.11	97.9999
1524.04	98.1246
1525.96	98.2321
1527.89	98.3214
1529.82	98.3894
1531.75	98.4371
1533.68	98.4695
1535.61	98.4907
1537.54	98.4979
1539.47	98.4858
1541.4	98.4695
1543.33	98.4668
1545.26	98.4749
1547.19	98.484
1549.12	98.4939
1551.05	98.5005
1552.98	98.4959
1554.91	98.4711
1556.84	98.4172
1558.77	98.3135
1560.7	98.1637
1562.63	97.9843
1564.56	97.7609
1566.49	97.4595
1568.42	97.0486
1570.35	96.4854
1572.28	95.764
1574.21	94.8463
1576.14	93.591
1578.07	91.8472
1580	89.5288
1581.93	86.6732
1583.86	83.6791
1585.79	81.2785
1587.72	80.1012
1589.65	80.2708
1591.58	81.409
1593.51	82.959
1595.44	84.5671
1597.37	86.1871
1599.3	87.9358
1601.23	89.844
1603.16	91.7621
1605.09	93.467
1607.02	94.8384
1608.95	95.88
1610.88	96.6622
1612.81	97.2403
1614.74	97.6589
1616.67	97.9566
1618.6	98.1778
1620.53	98.3415
1622.46	98.4569
1624.39	98.5249
1626.32	98.5646
1628.25	98.5877
1630.18	98.6018
1632.11	98.5993
1634.04	98.5847
1635.96	98.5559
1637.89	98.5226
1639.82	98.4941
1641.75	98.4878
1643.68	98.4975
1645.61	98.519
1647.54	98.557
1649.47	98.6323
1651.4	98.7189
1653.33	98.7806
1655.26	98.8145
1657.19	98.8517
1659.12	98.8804
1661.05	98.8854
1662.98	98.8664
1664.91	98.8517
1666.84	98.8532
1668.77	98.8729
1670.7	98.8985
1672.63	98.9382
1674.56	98.984
1676.49	99.0345
1678.42	99.0889
1680.35	99.1516
1682.28	99.2017
1684.21	99.2368
1686.14	99.2582
1688.07	99.2796
1690	99.297
1691.93	99.3226
1693.86	99.3503
1695.79	99.3695
1697.72	99.3725
1699.65	99.3804
1701.58	99.389
1703.51	99.4014
1705.44	99.4145
1707.37	99.4312
1709.3	99.4435
1711.23	99.4642
1713.16	99.486
1715.09	99.5
1717.02	99.4879
1718.95	99.4709
1720.88	99.4639
1722.81	99.4696
1724.74	99.4715
1726.67	99.4775
1728.6	99.4779
1730.53	99.4782
1732.46	99.4706
1734.39	99.4515
1736.32	99.4218
1738.25	99.4052
1740.18	99.386
1742.11	99.3669
1744.04	99.3558
1745.96	99.3576
1747.89	99.3524
1749.82	99.3512
1751.75	99.3522
1753.68	99.3582
1755.61	99.3575
1757.54	99.36
1759.47	99.3628
1761.4	99.3699
1763.33	99.3709
1765.26	99.3783
1767.19	99.3857
1769.12	99.3957
1771.05	99.3987
1772.98	99.4002
1774.91	99.3938
1776.84	99.3876
1778.77	99.3681
1780.7	99.3472
1782.63	99.331
1784.56	99.327
1786.49	99.3192
1788.42	99.3185
1790.35	99.3193
1792.28	99.3207
1794.21	99.3138
1796.14	99.3164
1798.07	99.3228
1800	99.3298
1801.93	99.3221
1803.86	99.3102
1805.79	99.2901
1807.72	99.2736
1809.65	99.2567
1811.58	99.2426
1813.51	99.2204
1815.44	99.2072
1817.37	99.1973
1819.3	99.1896
1821.23	99.1743
1823.16	99.1639
1825.09	99.1517
1827.02	99.1504
1828.95	99.1541
1830.88	99.1643
1832.81	99.174
1834.74	99.1978
1836.67	99.2201
1838.6	99.241
1840.53	99.2574
1842.46	99.277
1844.39	99.2815
1846.32	99.2796
1848.25	99.2746
1850.18	99.2777
1852.11	99.2739
1854.04	99.2709
1855.96	99.2631
1857.89	99.2563
1859.82	99.2433
1861.75	99.2366
1863.68	99.2272
1865.61	99.2248
1867.54	99.223
1869.47	99.2227
1871.4	99.2142
1873.33	99.2138
1875.26	99.2111
1877.19	99.2068
1879.12	99.1961
1881.05	99.1911
1882.98	99.184
1884.91	99.1852
1886.84	99.1848
1888.77	99.1845
1890.7	99.1755
1892.63	99.1692
1894.56	99.158
1896.49	99.147
1898.42	99.1256
1900.35	99.1013
1902.28	99.0676
1904.21	99.0383
1906.14	99.0104
1908.07	98.9865
1910	98.9532
1911.93	98.925
1913.86	98.8944
1915.79	98.8581
1917.72	98.8002
1919.65	98.7263
1921.58	98.6231
1923.51	98.5014
1925.44	98.3697
1927.37	98.2561
1929.3	98.1657
1931.23	98.1095
1933.16	98.0783
1935.09	98.0777
1937.02	98.0918
1938.95	98.117
1940.88	98.1396
1942.81	98.1667
1944.74	98.1918
1946.67	98.2287
1948.6	98.2718
1950.53	98.3217
1952.46	98.3686
1954.39	98.4285
1956.32	98.4936
1958.25	98.5605
1960.18	98.614
1962.11	98.6657
1964.04	98.7109
1965.96	98.7525
1967.89	98.7794
1969.82	98.8046
1971.75	98.8263
1973.68	98.8529
1975.61	98.8742
1977.54	98.8976
1979.47	98.9189
1981.4	98.9467
1983.33	98.971
1985.26	98.9951
1987.19	99.0069
1989.12	99.0165
1991.05	99.0212
1992.98	99.026
1994.91	99.0238
1996.84	99.0274
1998.77	99.0292
2000.7	99.0359
2002.63	99.0417
2004.56	99.0524
2006.49	99.0588
2008.42	99.0666
2010.35	99.0661
2012.28	99.0683
2014.21	99.0695
2016.14	99.0721
2018.07	99.065
2020	99.0535
2021.93	99.026
2023.86	98.9913
2025.79	98.9558
2027.72	98.9356
2029.65	98.9223
2031.58	98.915
2033.51	98.896
2035.44	98.8749
2037.37	98.8586
2039.3	98.8548
2041.23	98.8552
2043.16	98.8715
2045.09	98.8901
2047.02	98.9085
2048.95	98.9263
2050.88	98.9583
2052.81	98.9903
2054.74	99.0162
2056.67	99.0288
2058.6	99.0367
2060.53	99.0265
2062.46	99.0083
2064.39	98.9883
2066.32	98.9754
2068.25	98.9639
2070.18	98.966
2072.11	98.9761
2074.04	98.9925
2075.96	99.0035
2077.89	99.0172
2079.82	99.0302
2081.75	99.047
2083.68	99.0627
2085.61	99.0841
2087.54	99.0974
2089.47	99.1013
2091.4	99.0943
2093.33	99.0886
2095.26	99.0749
2097.19	99.0559
2099.12	99.0304
2101.05	99.0099
2102.98	98.9951
2104.91	98.9972
2106.84	99.007
2108.77	99.0192
2110.7	99.0219
2112.63	99.0245
2114.56	99.0273
2116.49	99.0323
2118.42	99.031
2120.35	99.0289
2122.28	99.0119
2124.21	98.9736
2126.14	98.914
2128.07	98.8554
2130	98.7979
2131.93	98.7322
2133.86	98.6462
2135.79	98.5615
2137.72	98.4858
2139.65	98.4158
2141.58	98.3443
2143.51	98.2923
2145.44	98.2723
2147.37	98.2915
2149.3	98.3324
2151.23	98.3864
2153.16	98.4448
2155.09	98.5007
2157.02	98.5316
2158.95	98.5435
2160.88	98.5421
2162.81	98.5264
2164.74	98.4971
2166.67	98.4792
2168.6	98.4731
2170.53	98.4828
2172.46	98.5194
2174.39	98.5875
2176.32	98.6569
2178.25	98.7171
2180.18	98.7706
2182.11	98.818
2184.04	98.8489
2185.96	98.8756
2187.89	98.8997
2189.82	98.9161
2191.75	98.9178
2193.68	98.918
2195.61	98.9238
2197.54	98.9431
2199.47	98.9717
2201.4	99.005
2203.33	99.0232
2205.26	99.0238
2207.19	99.0158
2209.12	99.01
2211.05	99.0018
2212.98	98.9953
2214.91	98.9912
2216.84	98.9893
2218.77	98.9787
2220.7	98.9625
2222.63	98.9497
2224.56	98.947
2226.49	98.9446
2228.42	98.9398
2230.35	98.9232
2232.28	98.8959
2234.21	98.8708
2236.14	98.8625
2238.07	98.8622
2240	98.8652
2241.93	98.8688
2243.86	98.8706
2245.79	98.8591
2247.72	98.837
2249.65	98.8154
2251.58	98.7995
2253.51	98.7807
2255.44	98.7694
2257.37	98.7727
2259.3	98.7826
2261.23	98.7963
2263.16	98.8269
2265.09	98.8628
2267.02	98.8914
2268.95	98.9162
2270.88	98.9399
2272.81	98.9514
2274.74	98.9508
2276.67	98.9382
2278.6	98.9177
2280.53	98.898
2282.46	98.8882
2284.39	98.882
2286.32	98.8701
2288.25	98.8547
2290.18	98.8561
2292.11	98.8774
2294.04	98.9
2295.96	98.9086
2297.89	98.9119
2299.82	98.9214
2301.75	98.9345
2303.68	98.9379
2305.61	98.9326
2307.54	98.9284
2309.47	98.9313
2311.4	98.9393
2313.33	98.9493
2315.26	98.9558
2317.19	98.953
2319.12	98.9419
2321.05	98.9402
2322.98	98.9564
2324.91	98.9745
2326.84	98.9841
2328.77	98.9892
2330.7	98.9919
2332.63	98.9954
2334.56	99.0016
2336.49	99.0083
2338.42	99.0161
2340.35	99.0264
2342.28	99.0391
2344.21	99.0527
2346.14	99.0627
2348.07	99.0638
2350	99.064
2351.93	99.0723
2353.86	99.0745
2355.79	99.0523
2357.72	99.0182
2359.65	98.9917
2361.58	98.974
2363.51	98.959
2365.44	98.9491
2367.37	98.9421
2369.3	98.9241
2371.23	98.8914
2373.16	98.8705
2375.09	98.8763
2377.02	98.8825
2378.95	98.8551
2380.88	98.809
2382.81	98.7867
2384.74	98.8041
2386.67	98.8391
2388.6	98.8739
2390.53	98.9046
2392.46	98.93
2394.39	98.9435
2396.32	98.9527
2398.25	98.9632
2400.18	98.9732
2402.11	98.9796
2404.04	98.9827
2405.96	98.9725
2407.89	98.9508
2409.82	98.9218
2411.75	98.8865
2413.68	98.844
2415.61	98.8057
2417.54	98.7708
2419.47	98.724
2421.4	98.6605
2423.33	98.6182
2425.26	98.6205
2427.19	98.6485
2429.12	98.6784
2431.05	98.7203
2432.98	98.7785
2434.91	98.8451
2436.84	98.9115
2438.77	98.9838
2440.7	99.0546
2442.63	99.1138
2444.56	99.1622
2446.49	99.2048
2448.42	99.2255
2450.35	99.2322
2452.28	99.2457
2454.21	99.2695
2456.14	99.2891
2458.07	99.2981
2460	99.2892
2461.93	99.277
2463.86	99.2653
2465.79	99.2444
2467.72	99.2134
2469.65	99.1891
2471.58	99.1682
2473.51	99.1541
2475.44	99.1495
2477.37	99.1515
2479.3	99.1514
2481.23	99.1614
2483.16	99.1952
2485.09	99.2538
2487.02	99.3003
2488.95	99.3175
2490.88	99.3199
2492.81	99.3195
2494.74	99.3004
2496.67	99.2745
2498.6	99.2612
2500.53	99.2688
2502.46	99.2779
2504.39	99.2676
2506.32	99.2355
2508.25	99.2112
2510.18	99.1946
2512.11	99.1808
2514.04	99.1708
2515.96	99.1624
2517.89	99.1568
2519.82	99.1814
2521.75	99.2159
2523.68	99.2278
2525.61	99.2174
2527.54	99.2107
2529.47	99.2239
2531.4	99.2707
2533.33	99.3195
2535.26	99.3444
2537.19	99.3586
2539.12	99.3914
2541.05	99.4246
2542.98	99.4402
2544.91	99.4394
2546.84	99.4464
2548.77	99.4758
2550.7	99.5326
2552.63	99.5881
2554.56	99.6299
2556.49	99.6614
2558.42	99.6885
2560.35	99.6982
2562.28	99.6996
2564.21	99.6995
2566.14	99.6995
2568.07	99.697
2570	99.6995
2571.93	99.6711
2573.86	99.5997
2575.79	99.5282
2577.72	99.4838
2579.65	99.4315
2581.58	99.3768
2583.51	99.3305
2585.44	99.2834
2587.37	99.2356
2589.3	99.2034
2591.23	99.167
2593.16	99.1303
2595.09	99.1098
2597.02	99.1225
2598.95	99.1598
2600.88	99.196
2602.81	99.2031
2604.74	99.2017
2606.67	99.2006
2608.6	99.1994
2610.53	99.2015
2612.46	99.2239
2614.39	99.2502
2616.32	99.2626
2618.25	99.2602
2620.18	99.2638
2622.11	99.2605
2624.04	99.2447
2625.96	99.2131
2627.89	99.1683
2629.82	99.1179
2631.75	99.0789
2633.68	99.0302
2635.61	98.9888
2637.54	98.9935
2639.47	99.0342
2641.4	99.052
2643.33	99.0475
2645.26	99.0408
2647.19	99.0404
2649.12	99.0367
2651.05	99.0379
2652.98	99.0467
2654.91	99.067
2656.84	99.0777
2658.77	99.0771
2660.7	99.0757
2662.63	99.0936
2664.56	99.1231
2666.49	99.1507
2668.42	99.1693
2670.35	99.2019
2672.28	99.232
2674.21	99.24
2676.14	99.2337
2678.07	99.2336
2680	99.2264
2681.93	99.2204
2683.86	99.2336
2685.79	99.2727
2687.72	99.2912
2689.65	99.2676
2691.58	99.2259
2693.51	99.1933
2695.44	99.1611
2697.37	99.1424
2699.3	99.1259
2701.23	99.1003
2703.16	99.0784
2705.09	99.0832
2707.02	99.0891
2708.95	99.0772
2710.88	99.0493
2712.81	99.0308
2714.74	99.018
2716.67	99.0131
2718.6	99.0276
2720.53	99.0704
2722.46	99.1069
2724.39	99.1257
2726.32	99.1437
2728.25	99.1797
2730.18	99.1978
2732.11	99.1804
2734.04	99.1673
2735.96	99.209
2737.89	99.2624
2739.82	99.2743
2741.75	99.2391
2743.68	99.1991
2745.61	99.1845
2747.54	99.1964
2749.47	99.1948
2751.4	99.1753
2753.33	99.1448
2755.26	99.1132
2757.19	99.0786
2759.12	99.0408
2761.05	98.9962
2762.98	98.9617
2764.91	98.935
2766.84	98.9222
2768.77	98.9179
2770.7	98.913
2772.63	98.8956
2774.56	98.8757
2776.49	98.8617
2778.42	98.8714
2780.35	98.8832
2782.28	98.8745
2784.21	98.8501
2786.14	98.8348
2788.07	98.8231
2790	98.8154
2791.93	98.7946
2793.86	98.7528
2795.79	98.7058
2797.72	98.674
2799.65	98.636
2801.58	98.5729
2803.51	98.4619
2805.44	98.3144
2807.37	98.134
2809.3	97.8674
2811.23	97.4422
2813.16	96.8422
2815.09	96.0424
2817.02	95.0696
2818.95	94.0345
2820.88	93.0545
2822.81	92.1952
2824.74	91.5161
2826.67	91.0139
2828.6	90.6488
2830.53	90.3836
2832.46	90.1656
2834.39	89.9608
2836.32	89.9016
2838.25	90.145
2840.18	90.643
2842.11	91.1819
2844.04	91.6261
2845.96	91.9472
2847.89	92.1391
2849.82	92.1976
2851.75	92.1923
2853.68	92.1806
2855.61	92.1594
2857.54	92.1254
2859.47	92.0797
2861.4	91.9462
2863.33	91.6782
2865.26	91.3175
2867.19	90.9339
2869.12	90.5607
2871.05	90.2069
2872.98	89.8579
2874.91	89.5519
2876.84	89.3637
2878.77	89.3152
2880.7	89.3434
2882.63	89.3949
2884.56	89.4389
2886.49	89.465
2888.42	89.4541
2890.35	89.3662
2892.28	89.1754
2894.21	88.931
2896.14	88.6625
2898.07	88.3585
2900	88.0299
2901.93	87.7227
2903.86	87.4598
2905.79	87.25
2907.72	87.0873
2909.65	86.9774
2911.58	86.9018
2913.51	86.7842
2915.44	86.545
2917.37	86.1925
2919.3	85.7315
2921.23	85.0917
2923.16	84.2022
2925.09	83.0629
2927.02	81.6931
2928.95	80.1774
2930.88	78.6989
2932.81	77.442
2934.74	76.4948
2936.67	75.9286
2938.6	75.8406
2940.53	76.2693
2942.46	77.1162
2944.39	78.2109
2946.32	79.3679
2948.25	80.4345
2950.18	81.3251
2952.11	82.0239
2954.04	82.5395
2955.96	82.8953
2957.89	83.1349
2959.82	83.3208
2961.75	83.4774
2963.68	83.6327
2965.61	83.8511
2967.54	84.1592
2969.47	84.5297
2971.4	84.9569
2973.33	85.4028
2975.26	85.8053
2977.19	86.1524
2979.12	86.4512
2981.05	86.6679
2982.98	86.7772
2984.91	86.7834
2986.84	86.7068
2988.77	86.5538
2990.7	86.3374
2992.63	86.1048
2994.56	85.9197
2996.49	85.8388
2998.42	85.939
3000.35	86.2637
3002.28	86.7756
3004.21	87.4096
3006.14	88.1314
3008.07	88.9181
3010	89.7582
3011.93	90.6348
3013.86	91.5055
3015.79	92.3275
3017.72	93.0957
3019.65	93.7906
3021.58	94.3841
3023.51	94.9041
3025.44	95.3745
3027.37	95.7532
3029.3	96.0488
3031.23	96.2988
3033.16	96.4775
3035.09	96.6079
3037.02	96.7817
3038.95	96.9838
3040.88	97.1327
3042.81	97.2269
3044.74	97.3267
3046.67	97.4604
3048.6	97.5913
3050.53	97.6463
3052.46	97.6271
3054.39	97.6371
3056.32	97.7152
3058.25	97.7776
3060.18	97.799
3062.11	97.8283
3064.04	97.8472
3065.96	97.8298
3067.89	97.8415
3069.82	97.9288
3071.75	98.0155
3073.68	98.0093
3075.61	97.9571
3077.54	97.9602
3079.47	97.9777
3081.4	97.8965
3083.33	97.7309
3085.26	97.5673
3087.19	97.4115
3089.12	97.233
3091.05	97.0401
3092.98	96.8596
3094.91	96.7378
3096.84	96.7152
3098.77	96.7737
3100.7	96.8907
3102.63	97.0652
3104.56	97.273
3106.49	97.4981
3108.42	97.751
3110.35	98.0062
3112.28	98.2156
3114.21	98.356
3116.14	98.446
3118.07	98.5316
3120	98.6409
3121.93	98.7645
3123.86	98.8791
3125.79	98.9461
3127.72	98.963
3129.65	98.9879
3131.58	99.0497
3133.51	99.1075
3135.44	99.1321
3137.37	99.13
3139.3	99.1236
3141.23	99.1168
3143.16	99.0942
3145.09	99.0792
3147.02	99.1137
3148.95	99.1478
3150.88	99.1347
3152.81	99.1297
3154.74	99.1669
3156.67	99.2134
3158.6	99.2663
3160.53	99.2944
3162.46	99.2603
3164.39	99.2112
3166.32	99.1779
3168.25	99.1332
3170.18	99.1252
3172.11	99.173
3174.04	99.2001
3175.96	99.1911
3177.89	99.1915
3179.82	99.188
3181.75	99.159
3183.68	99.0852
3185.61	98.9916
3187.54	98.9659
3189.47	99.0321
3191.4	99.1306
3193.33	99.2397
3195.26	99.3184
3197.19	99.3266
3199.12	99.3133
3201.05	99.3299
3202.98	99.3452
3204.91	99.3452
3206.84	99.3419
3208.77	99.3506
3210.7	99.3787
3212.63	99.4057
3214.56	99.4039
3216.49	99.4011
3218.42	99.4036
3220.35	99.3959
3222.28	99.4026
3224.21	99.4415
3226.14	99.46
3228.07	99.4419
3230	99.4252
3231.93	99.4391
3233.86	99.4717
3235.79	99.4967
3237.72	99.4928
3239.65	99.4982
3241.58	99.522
3243.51	99.4967
3245.44	99.4278
3247.37	99.436
3249.3	99.5137
3251.23	99.5428
3253.16	99.5033
3255.09	99.4667
3257.02	99.4464
3258.95	99.4481
3260.88	99.4798
3262.81	99.4949
3264.74	99.4708
3266.67	99.4909
3268.6	99.5413
3270.53	99.5364
3272.46	99.519
3274.39	99.5495
3276.32	99.5439
3278.25	99.4716
3280.18	99.3997
3282.11	99.3703
3284.04	99.3703
3285.96	99.3751
3287.89	99.342
3289.82	99.2932
3291.75	99.2977
3293.68	99.3647
3295.61	99.4124
3297.54	99.3995
3299.47	99.3499
3301.4	99.3025
3303.33	99.2478
3305.26	99.1763
3307.19	99.1059
3309.12	99.0693
3311.05	99.0852
3312.98	99.1654
3314.91	99.2295
3316.84	99.2001
3318.77	99.1323
3320.7	99.0902
3322.63	99.0147
3324.56	98.9189
3326.49	98.877
3328.42	98.8521
3330.35	98.7668
3332.28	98.6748
3334.21	98.65
3336.14	98.7052
3338.07	98.7861
3340	98.8479
3341.93	98.9158
3343.86	99.0117
3345.79	99.0382
3347.72	98.9589
3349.65	98.8659
3351.58	98.8282
3353.51	98.8302
3355.44	98.8562
3357.37	98.8621
3359.3	98.8396
3361.23	98.8495
3363.16	98.9325
3365.09	99.0219
3367.02	99.0617
3368.95	99.0666
3370.88	99.0828
3372.81	99.1001
3374.74	99.108
3376.67	99.1274
3378.6	99.1645
3380.53	99.1552
3382.46	99.0924
3384.39	99.055
3386.32	99.0974
3388.25	99.1644
3390.18	99.177
3392.11	99.0977
3394.04	99.0235
3395.96	99.0582
3397.89	99.1312
3399.82	99.1452
3401.75	99.1676
3403.68	99.1973
3405.61	99.1731
3407.54	99.1478
3409.47	99.1784
3411.4	99.2177
3413.33	99.263
3415.26	99.3035
3417.19	99.281
3419.12	99.2046
3421.05	99.1887
3422.98	99.2519
3424.91	99.3114
3426.84	99.328
3428.77	99.3446
3430.7	99.3661
3432.63	99.3675
3434.56	99.3384
3436.49	99.3283
3438.42	99.3732
3440.35	99.4442
3442.28	99.4561
3444.21	99.3976
3446.14	99.3464
3448.07	99.3512
3450	99.3538
3451.93	99.3302
3453.86	99.2952
3455.79	99.2548
3457.72	99.2495
3459.65	99.3461
3461.58	99.4496
3463.51	99.4158
3465.44	99.2825
3467.37	99.1732
3469.3	99.1008
3471.23	99.1107
3473.16	99.2386
3475.09	99.3612
3477.02	99.3645
3478.95	99.3367
3480.88	99.3413
3482.81	99.3182
3484.74	99.2518
3486.67	99.2434
3488.6	99.3032
3490.53	99.3349
3492.46	99.3112
3494.39	99.303
3496.32	99.2971
3498.25	99.2581
3500.18	99.2327
3502.11	99.2753
3504.04	99.3457
3505.96	99.3983
3507.89	99.4104
3509.82	99.3916
3511.75	99.3589
3513.68	99.3374
3515.61	99.3312
3517.54	99.3191
3519.47	99.28
3521.4	99.2685
3523.33	99.3125
3525.26	99.3827
3527.19	99.456
3529.12	99.5039
3531.05	99.464
3532.98	99.3618
3534.91	99.2764
3536.84	99.2392
3538.77	99.2116
3540.7	99.1969
3542.63	99.2455
3544.56	99.3273
3546.49	99.3241
3548.42	99.2517
3550.35	99.1935
3552.28	99.1471
3554.21	99.1221
3556.14	99.1814
3558.07	99.2531
3560	99.2258
3561.93	99.1273
3563.86	99.088
3565.79	99.1687
3567.72	99.2701
3569.65	99.2586
3571.58	99.2257
3573.51	99.2848
3575.44	99.3237
3577.37	99.2483
3579.3	99.1618
3581.23	99.1184
3583.16	99.0958
3585.09	99.1204
3587.02	99.1935
3588.95	99.2171
3590.88	99.1836
3592.81	99.1783
3594.74	99.2025
3596.67	99.2093
3598.6	99.2188
3600.53	99.2131
3602.46	99.157
3604.39	99.0887
3606.32	99.0817
3608.25	99.145
3610.18	99.2331
3612.11	99.2842
3614.04	99.2568
3615.96	99.173
3617.89	99.1388
3619.82	99.1686
3621.75	99.1712
3623.68	99.1486
3625.61	99.1719
3627.54	99.2179
3629.47	99.2404
3631.4	99.2371
3633.33	99.2186
3635.26	99.1638
3637.19	99.0729
3639.12	99.0004
3641.05	98.9637
3642.98	98.9263
3644.91	98.9326
3646.84	99.0335
3648.77	99.1585
3650.7	99.1867
3652.63	99.0934
3654.56	98.9597
3656.49	98.8609
3658.42	98.8055
3660.35	98.8106
3662.28	98.8813
3664.21	98.9487
3666.14	98.9488
3668.07	98.9356
3670	98.9799
3671.93	99.0374
3673.86	99.0661
3675.79	99.1047
3677.72	99.116
3679.65	99.0487
3681.58	98.9743
3683.51	98.9437
3685.44	98.9426
3687.37	98.9924
3689.3	99.0766
3691.23	99.1329
3693.16	99.1445
3695.09	99.1086
3697.02	99.0424
3698.95	99.0217
3700.88	99.0732
3702.81	99.1247
3704.74	99.1237
3706.67	99.1066
3708.6	99.1358
3710.53	99.2052
3712.46	99.2399
3714.39	99.1947
3716.32	99.1019
3718.25	99.0075
3720.18	98.9591
3722.11	98.9963
3724.04	99.0605
3725.96	99.0427
3727.89	98.9661
3729.82	98.9357
3731.75	98.9674
3733.68	98.9916
3735.61	99.0019
3737.54	99.0416
3739.47	99.0728
3741.4	99.0779
3743.33	99.1572
3745.26	99.2698
3747.19	99.2948
3749.12	99.309
3751.05	99.3815
3752.98	99.3924
3754.91	99.3092
3756.84	99.2419
3758.77	99.2321
3760.7	99.1912
3762.63	99.1
3764.56	99.0712
3766.49	99.1337
3768.42	99.1747
3770.35	99.1733
3772.28	99.1766
3774.21	99.1862
3776.14	99.1814
3778.07	99.1695
3780	99.1771
3781.93	99.2303
3783.86	99.2969
3785.79	99.3332
3787.72	99.3122
3789.65	99.2618
3791.58	99.2283
3793.51	99.2277
3795.44	99.2595
3797.37	99.3236
3799.3	99.3666
3801.23	99.3748
3803.16	99.3686
3805.09	99.3716
3807.02	99.3995
3808.95	99.4167
3810.88	99.3679
3812.81	99.3435
3814.74	99.4168
3816.67	99.4987
3818.6	99.5001
3820.53	99.4911
3822.46	99.5152
3824.39	99.5215
3826.32	99.4806
3828.25	99.4521
3830.18	99.4516
3832.11	99.4532
3834.04	99.4506
3835.96	99.4804
3837.89	99.528
3839.82	99.5651
3841.75	99.5696
3843.68	99.5443
3845.61	99.5036
3847.54	99.4676
3849.47	99.4194
3851.4	99.4287
3853.33	99.5267
3855.26	99.5687
3857.19	99.4601
3859.12	99.3584
3861.05	99.3583
3862.98	99.4045
3864.91	99.4209
3866.84	99.3951
3868.77	99.3549
3870.7	99.3473
3872.63	99.3355
3874.56	99.3002
3876.49	99.265
3878.42	99.2712
3880.35	99.3009
3882.28	99.3406
3884.21	99.3997
3886.14	99.4802
3888.07	99.5131
3890	99.5189
3891.93	99.5263
3893.86	99.4825
3895.79	99.3784
3897.72	99.3416
3899.65	99.3711
3901.58	99.3818
3903.51	99.3679
3905.44	99.3845
3907.37	99.3846
3909.3	99.3607
3911.23	99.37
3913.16	99.4335
3915.09	99.4541
3917.02	99.4091
3918.95	99.3684
3920.88	99.3816
3922.81	99.3546
3924.74	99.2554
3926.67	99.1764
3928.6	99.2083
3930.53	99.2666
3932.46	99.2749
3934.39	99.2739
3936.32	99.3351
3938.25	99.3804
3940.18	99.3802
3942.11	99.3702
3944.04	99.3558
3945.96	99.3015
3947.89	99.2455
3949.82	99.1747
3951.75	99.1028
3953.68	99.0846
3955.61	99.1575
3957.54	99.2342
3959.47	99.2621
3961.4	99.2255
3963.33	99.1628
3965.26	99.1125
3967.19	99.1262
3969.12	99.1896
3971.05	99.2902
3972.98	99.3403
3974.91	99.2983
3976.84	99.2157
3978.77	99.1749
3980.7	99.1499
3982.63	99.1638
3984.56	99.1982
3986.49	99.1979
3988.42	99.1581
3990.35	99.1371
3992.28	99.1043
3994.21	99.124
3996.14	99.1857
3998.07	99.2408
4000	99.4103

## Sheet: C
wavenumber	Transmission
700	83.3285
701.93	77.9039
703.86	75.6683
705.789	72.9886
707.719	69.6847
709.649	66.698
711.579	63.7488
713.509	61.8727
715.439	61.6537
717.368	63.2333
719.298	65.9243
721.228	69.237
723.158	71.9385
725.088	73.5603
727.018	74.4552
728.947	75.3423
730.877	75.9454
732.807	76.4907
734.737	76.6816
736.667	76.9062
738.596	77.1529
740.526	77.3891
742.456	77.2774
744.386	77.1844
746.316	76.9033
748.246	76.4416
750.175	75.4212
752.105	74.2655
754.035	73.12
755.965	72.4803
757.895	72.2364
759.825	72.293
761.754	72.2566
763.684	72.5244
765.614	72.9006
767.544	73.3153
769.474	73.5913
771.404	74.0838
773.333	74.5193
775.263	75.116
777.193	75.7336
779.123	76.322
781.053	76.5505
782.982	76.8381
784.912	76.9729
786.842	77.0019
788.772	77.0289
790.702	77.481
792.632	77.6307
794.561	77.4068
796.491	77.0796
798.421	76.9614
800.351	76.5872
802.281	76.2533
804.211	76.0751
806.14	76.3797
808.07	76.7112
810	76.8319
811.93	76.5371
813.86	76.2257
815.789	75.6561
817.719	74.849
819.649	73.6104
821.579	72.3246
823.509	70.9071
825.439	69.3806
827.368	67.864
829.298	67.3421
831.228	67.8161
833.158	68.6529
835.088	69.2195
837.018	70.099
838.947	71.4427
840.877	73.1262
842.807	74.6733
844.737	76.1472
846.667	77.096
848.596	77.5453
850.526	77.6638
852.456	77.9117
854.386	77.9915
856.316	77.9281
858.246	77.6468
860.175	77.6534
862.105	77.8464
864.035	78.0535
865.965	77.9534
867.895	77.8543
869.825	77.7311
871.754	77.9293
873.684	78.1899
875.614	78.3917
877.544	78.3672
879.474	78.3574
881.404	78.0503
883.333	77.5386
885.263	76.7558
887.193	75.8732
889.123	74.4954
891.053	72.4123
892.982	69.2558
894.912	65.3768
896.842	61.2651
898.772	57.7891
900.702	55.4066
902.632	54.6978
904.561	55.9852
906.491	59.4729
908.421	64.3554
910.351	69.4121
912.281	73.3018
914.211	75.8205
916.14	77.2569
918.07	78.2447
920	78.8325
921.93	79.2763
923.86	79.5505
925.789	79.8525
927.719	79.9268
929.649	79.7607
931.579	79.1482
933.509	78.291
935.439	77.0145
937.368	75.0889
939.298	71.7903
941.228	67.0455
943.158	61.315
945.088	55.8719
947.018	51.8224
948.947	50.0975
950.877	50.7842
952.807	53.4913
954.737	57.4087
956.667	61.9881
958.596	66.4241
960.526	70.1837
962.456	72.9696
964.386	75.0768
966.316	76.6017
968.246	77.8347
970.175	78.6474
972.105	79.0124
974.035	78.7843
975.965	78.1731
977.895	76.8891
979.825	74.788
981.754	71.7673
983.684	68.2246
985.614	64.4457
987.544	61.0748
989.474	58.7618
991.404	58.1713
993.333	59.0303
995.263	60.5103
997.193	61.2847
999.123	60.0815
1001.05	55.9302
1002.98	49.4089
1004.91	42.0482
1006.84	35.5272
1008.77	30.7877
1010.7	28.251
1012.63	27.8353
1014.56	29.2352
1016.49	31.6155
1018.42	33.577
1020.35	33.3252
1022.28	30.0599
1024.21	24.8154
1026.14	19.7576
1028.07	16.3475
1030	15.0681
1031.93	15.916
1033.86	18.9557
1035.79	24.2814
1037.72	31.7486
1039.65	40.3062
1041.58	48.4069
1043.51	55.0946
1045.44	60.4381
1047.37	64.4445
1049.3	67.327
1051.23	69.3031
1053.16	70.5248
1055.09	71.0574
1057.02	71.3999
1058.95	71.5955
1060.88	71.5796
1062.81	71.2018
1064.74	70.3995
1066.67	68.9445
1068.6	66.6635
1070.53	62.6998
1072.46	56.2975
1074.39	47.4251
1076.32	37.2877
1078.25	27.9403
1080.18	21.2358
1082.11	17.5867
1084.04	16.5998
1085.96	17.9008
1087.89	21.4163
1089.82	26.9811
1091.75	34.1273
1093.68	42.0205
1095.61	49.613
1097.54	55.8348
1099.47	60.4379
1101.4	63.5759
1103.33	65.5187
1105.26	66.7036
1107.19	67.7169
1109.12	68.3767
1111.05	68.3706
1112.98	67.7271
1114.91	66.7826
1116.84	65.5959
1118.77	64.1588
1120.7	62.292
1122.63	60.2346
1124.56	58.4155
1126.49	57.2362
1128.42	56.7843
1130.35	56.8017
1132.28	56.5837
1134.21	55.9397
1136.14	55.1983
1138.07	54.7309
1140	54.5407
1141.93	54.6367
1143.86	55.0052
1145.79	55.5687
1147.72	56.0937
1149.65	56.6979
1151.58	57.5145
1153.51	58.5574
1155.44	59.8208
1157.37	61.3695
1159.3	62.9628
1161.23	64.5052
1163.16	66.0275
1165.09	67.5146
1167.02	68.8247
1168.95	70.0592
1170.88	71.2065
1172.81	72.1783
1174.74	72.7058
1176.67	72.4744
1178.6	71.3452
1180.53	69.7648
1182.46	68.1336
1184.39	66.5318
1186.32	64.6686
1188.25	62.2638
1190.18	59.3056
1192.11	56.2592
1194.04	53.61
1195.96	51.7973
1197.89	51.2466
1199.82	52.379
1201.75	55.1392
1203.68	58.8302
1205.61	62.4723
1207.54	65.5841
1209.47	68.0327
1211.4	69.8091
1213.33	71.0029
1215.26	71.8572
1217.19	72.6252
1219.12	73.6054
1221.05	74.76
1222.98	75.8291
1224.91	76.5962
1226.84	77.0769
1228.77	77.2545
1230.7	77.0977
1232.63	76.7017
1234.56	76.3237
1236.49	76.0772
1238.42	76.0796
1240.35	76.2196
1242.28	76.0824
1244.21	75.3867
1246.14	74.1824
1248.07	72.3864
1250	70.0139
1251.93	67.759
1253.86	66.8834
1255.79	68.0179
1257.72	70.4578
1259.65	72.7783
1261.58	74.2172
1263.51	75.1091
1265.44	76.0301
1267.37	76.9248
1269.3	77.4934
1271.23	77.7358
1273.16	77.8176
1275.09	77.8279
1277.02	77.7446
1278.95	77.4274
1280.88	76.9284
1282.81	76.4351
1284.74	75.8855
1286.67	75.1476
1288.6	74.3222
1290.53	73.589
1292.46	73.1435
1294.39	73.1192
1296.32	73.3973
1298.25	73.7208
1300.18	73.8552
1302.11	73.6823
1304.04	73.3172
1305.96	73.0848
1307.89	73.282
1309.82	73.9871
1311.75	74.9619
1313.68	75.8045
1315.61	76.2416
1317.54	76.421
1319.47	76.6576
1321.4	77.0711
1323.33	77.5974
1325.26	78.1244
1327.19	78.479
1329.12	78.7186
1331.05	78.9675
1332.98	79.1528
1334.91	79.1868
1336.84	79.1393
1338.77	78.9828
1340.7	78.7692
1342.63	78.6805
1344.56	78.8312
1346.49	78.9989
1348.42	78.9658
1350.35	78.8213
1352.28	78.7611
1354.21	78.7381
1356.14	78.7635
1358.07	78.7594
1360	78.555
1361.93	78.2147
1363.86	78.0236
1365.79	77.8982
1367.72	77.6791
1369.65	77.4501
1371.58	77.2888
1373.51	76.8696
1375.44	75.9576
1377.37	74.5412
1379.3	72.4876
1381.23	69.3063
1383.16	64.9166
1385.09	60.1447
1387.02	56.4937
1388.95	55.2149
1390.88	56.6897
1392.81	60.1537
1394.74	64.1432
1396.67	67.1689
1398.6	68.6171
1400.53	68.7055
1402.46	67.5207
1404.39	64.3553
1406.32	58.5623
1408.25	49.9838
1410.18	39.6424
1412.11	30.3821
1414.04	24.8835
1415.96	23.5533
1417.89	25.2416
1419.82	28.087
1421.75	30.5688
1423.68	32.744
1425.61	35.9658
1427.54	41.2783
1429.47	48.3363
1431.4	55.2406
1433.33	59.8772
1435.26	61.0081
1437.19	58.9447
1439.12	55.4504
1441.05	52.065
1442.98	49.0175
1444.91	46.3341
1446.84	44.1334
1448.77	42.3373
1450.7	40.6266
1452.63	38.682
1454.56	35.8749
1456.49	31.842
1458.42	27.5652
1460.35	24.4771
1462.28	22.9123
1464.21	22.7288
1466.14	23.9776
1468.07	26.554
1470	29.5906
1471.93	31.5709
1473.86	31.0729
1475.79	27.7733
1477.72	22.6551
1479.65	17.6368
1481.58	14.3723
1483.51	13.5641
1485.44	15.3893
1487.37	20.019
1489.3	27.2729
1491.23	36.0555
1493.16	44.5051
1495.09	51.2522
1497.02	56.0775
1498.95	59.5997
1500.88	62.4455
1502.81	64.9778
1504.74	66.8304
1506.67	67.6776
1508.6	68.1742
1510.53	69.1751
1512.46	70.3544
1514.39	71.2364
1516.32	71.7707
1518.25	72.1239
1520.18	72.201
1522.11	72.1068
1524.04	72.3119
1525.96	73.0198
1527.89	73.6391
1529.82	74.0874
1531.75	74.3935
1533.68	74.4866
1535.61	74.8214
1537.54	75.529
1539.47	75.5432
1541.4	74.8944
1543.33	74.624
1545.26	74.99
1547.19	75.4184
1549.12	75.8157
1551.05	76.1958
1552.98	76.5206
1554.91	76.8793
1556.84	77.1348
1558.77	76.3376
1560.7	75.0112
1562.63	74.7167
1564.56	75.3784
1566.49	75.8152
1568.42	75.7864
1570.35	75.4263
1572.28	75.2727
1574.21	75.1047
1576.14	74.0027
1578.07	72.3461
1580	71.3041
1581.93	70.6306
1583.86	69.8184
1585.79	68.7347
1587.72	67.4943
1589.65	66.3222
1591.58	65.4544
1593.51	64.7165
1595.44	64.0897
1597.37	63.6089
1599.3	63.2972
1601.23	63.1003
1603.16	63.1341
1605.09	63.2718
1607.02	63.4146
1608.95	63.3618
1610.88	62.8758
1612.81	61.844
1614.74	60.2047
1616.67	57.6973
1618.6	55.1222
1620.53	53.3788
1622.46	52.1225
1624.39	50.9182
1626.32	50.3793
1628.25	50.7098
1630.18	51.7322
1632.11	53.4928
1634.04	55.7463
1635.96	57.7762
1637.89	59.7288
1639.82	62.0647
1641.75	64.7576
1643.68	67.3198
1645.61	69.1492
1647.54	70.225
1649.47	71.7141
1651.4	73.2983
1653.33	73.4891
1655.26	73.0296
1657.19	73.6766
1659.12	74.9064
1661.05	75.7492
1662.98	76.0659
1664.91	76.2742
1666.84	76.7319
1668.77	77.181
1670.7	77.2183
1672.63	77.3119
1674.56	77.3248
1676.49	76.9983
1678.42	76.9092
1680.35	77.6195
1682.28	78.2686
1684.21	77.9122
1686.14	77.2452
1688.07	77.564
1690	78.5195
1691.93	79.5855
1693.86	80.424
1695.79	80.5585
1697.72	80.1819
1699.65	79.7343
1701.58	79.102
1703.51	78.8137
1705.44	78.761
1707.37	78.4705
1709.3	78.3084
1711.23	78.4597
1713.16	78.3741
1715.09	77.98
1717.02	76.9911
1718.95	75.7211
1720.88	75.1446
1722.81	75.4042
1724.74	75.8731
1726.67	76.5239
1728.6	77.3613
1730.53	78.4571
1732.46	79.3342
1734.39	79.4282
1736.32	79.4062
1738.25	80.0118
1740.18	80.3613
1742.11	80.1561
1744.04	79.8878
1745.96	79.7408
1747.89	79.5925
1749.82	79.2302
1751.75	78.5356
1753.68	78.2206
1755.61	78.4769
1757.54	78.9234
1759.47	79.2926
1761.4	79.5138
1763.33	79.5085
1765.26	79.6075
1767.19	79.8643
1769.12	80.1057
1771.05	79.9836
1772.98	79.484
1774.91	79.0469
1776.84	79.1418
1778.77	79.3855
1780.7	79.4663
1782.63	79.458
1784.56	79.3956
1786.49	79.1871
1788.42	79.2456
1790.35	79.5765
1792.28	79.6697
1794.21	79.3849
1796.14	79.3412
1798.07	79.6007
1800	79.6963
1801.93	79.3794
1803.86	79.0759
1805.79	79.1045
1807.72	79.4205
1809.65	79.663
1811.58	79.8162
1813.51	79.9186
1815.44	79.9186
1817.37	79.7726
1819.3	79.7938
1821.23	79.9944
1823.16	80.0845
1825.09	79.8142
1827.02	79.5071
1828.95	79.4519
1830.88	79.5936
1832.81	79.6897
1834.74	79.8163
1836.67	79.903
1838.6	79.9509
1840.53	80.0619
1842.46	80.1469
1844.39	79.8224
1846.32	79.3375
1848.25	79.1213
1850.18	79.2599
1852.11	79.5611
1854.04	79.8982
1855.96	79.9957
1857.89	79.8912
1859.82	79.7693
1861.75	79.7832
1863.68	79.8784
1865.61	80.0197
1867.54	80.0174
1869.47	79.8486
1871.4	79.6974
1873.33	79.815
1875.26	80.0289
1877.19	80.1457
1879.12	80.0452
1881.05	79.7911
1882.98	79.5498
1884.91	79.5953
1886.84	79.834
1888.77	79.9622
1890.7	79.7762
1892.63	79.5984
1894.56	79.6213
1896.49	79.6214
1898.42	79.3416
1900.35	78.9796
1902.28	78.7515
1904.21	78.7802
1906.14	78.8522
1908.07	78.7476
1910	78.5207
1911.93	78.4816
1913.86	78.6536
1915.79	78.864
1917.72	78.9316
1919.65	78.9696
1921.58	78.9219
1923.51	78.6725
1925.44	78.4572
1927.37	78.5868
1929.3	78.7447
1931.23	78.716
1933.16	78.6358
1935.09	78.6444
1937.02	78.7775
1938.95	79.1395
1940.88	79.4851
1942.81	79.5478
1944.74	79.4231
1946.67	79.4265
1948.6	79.5449
1950.53	79.6625
1952.46	79.682
1954.39	79.6217
1956.32	79.5259
1958.25	79.5062
1960.18	79.5262
1962.11	79.5753
1964.04	79.6309
1965.96	79.5976
1967.89	79.3247
1969.82	79.0234
1971.75	78.9865
1973.68	79.1977
1975.61	79.3403
1977.54	79.3175
1979.47	79.225
1981.4	79.1987
1983.33	79.2192
1985.26	79.258
1987.19	79.3098
1989.12	79.422
1991.05	79.5181
1992.98	79.5647
1994.91	79.5831
1996.84	79.6209
1998.77	79.6182
2000.7	79.555
2002.63	79.4493
2004.56	79.356
2006.49	79.2545
2008.42	79.1689
2010.35	79.1137
2012.28	79.1106
2014.21	79.0644
2016.14	78.8453
2018.07	78.4566
2020	78.1111
2021.93	77.9183
2023.86	77.8434
2025.79	77.7777
2027.72	77.7251
2029.65	77.7095
2031.58	77.7052
2033.51	77.7374
2035.44	77.9222
2037.37	78.1921
2039.3	78.4595
2041.23	78.6901
2043.16	78.8258
2045.09	78.8664
2047.02	78.9033
2048.95	78.9274
2050.88	78.9125
2052.81	78.7695
2054.74	78.5628
2056.67	78.5947
2058.6	78.8351
2060.53	78.9322
2062.46	78.9787
2064.39	79.1384
2066.32	79.1946
2068.25	79.0812
2070.18	79.0492
2072.11	79.1593
2074.04	79.2672
2075.96	79.3266
2077.89	79.401
2079.82	79.4115
2081.75	79.2862
2083.68	79.1639
2085.61	79.1066
2087.54	78.957
2089.47	78.7619
2091.4	78.7512
2093.33	78.8008
2095.26	78.7072
2097.19	78.7385
2099.12	78.907
2101.05	78.7297
2102.98	78.3855
2104.91	78.454
2106.84	78.8272
2108.77	79.1463
2110.7	79.2321
2112.63	78.8829
2114.56	78.2788
2116.49	77.8938
2118.42	77.8802
2120.35	78.1232
2122.28	78.5004
2124.21	78.8197
2126.14	78.8912
2128.07	78.7363
2130	78.6698
2131.93	78.7968
2133.86	78.8203
2135.79	78.5861
2137.72	78.2971
2139.65	78.1864
2141.58	78.3563
2143.51	78.5156
2145.44	78.3457
2147.37	78.0601
2149.3	78.0519
2151.23	78.2584
2153.16	78.2793
2155.09	77.955
2157.02	77.8113
2158.95	78.1569
2160.88	78.42
2162.81	78.1843
2164.74	77.8871
2166.67	77.8457
2168.6	77.8948
2170.53	77.821
2172.46	77.7047
2174.39	77.6604
2176.32	77.6136
2178.25	77.6218
2180.18	77.9527
2182.11	78.261
2184.04	78.0976
2185.96	77.7508
2187.89	77.5711
2189.82	77.4716
2191.75	77.5044
2193.68	77.6627
2195.61	77.7967
2197.54	77.8885
2199.47	78.0919
2201.4	78.3367
2203.33	78.3553
2205.26	78.0914
2207.19	77.8806
2209.12	77.797
2211.05	77.6935
2212.98	77.5809
2214.91	77.6357
2216.84	77.8204
2218.77	77.9486
2220.7	77.9523
2222.63	78.0641
2224.56	78.2404
2226.49	78.1992
2228.42	78.0092
2230.35	78.0177
2232.28	78.0204
2234.21	77.7423
2236.14	77.4114
2238.07	77.3326
2240	77.4902
2241.93	77.8698
2243.86	78.1595
2245.79	78.0423
2247.72	77.6879
2249.65	77.5059
2251.58	77.5536
2253.51	77.7018
2255.44	77.7153
2257.37	77.5847
2259.3	77.5809
2261.23	77.9923
2263.16	78.5286
2265.09	78.6851
2267.02	78.4414
2268.95	78.3017
2270.88	78.425
2272.81	78.5942
2274.74	78.6019
2276.67	78.5415
2278.6	78.403
2280.53	78.1652
2282.46	77.8864
2284.39	77.5993
2286.32	77.4061
2288.25	77.7461
2290.18	78.308
2292.11	78.3602
2294.04	78.1031
2295.96	78.0672
2297.89	78.0342
2299.82	78.0181
2301.75	78.1369
2303.68	78.2727
2305.61	78.3973
2307.54	78.5246
2309.47	78.5287
2311.4	78.5792
2313.33	78.5365
2315.26	78.2364
2317.19	77.945
2319.12	77.8825
2321.05	77.929
2322.98	78.1721
2324.91	78.4388
2326.84	78.4091
2328.77	78.0482
2330.7	77.671
2332.63	77.5317
2334.56	77.7629
2336.49	78.018
2338.42	77.9426
2340.35	77.6516
2342.28	77.6241
2344.21	78.01
2346.14	78.6728
2348.07	79.0773
2350	78.8768
2351.93	78.4616
2353.86	78.3584
2355.79	78.2882
2357.72	78.1803
2359.65	78.307
2361.58	78.5389
2363.51	78.4308
2365.44	78.0594
2367.37	77.7433
2369.3	77.6965
2371.23	77.6364
2373.16	77.4083
2375.09	77.3614
2377.02	77.7435
2378.95	77.9592
2380.88	77.772
2382.81	77.7432
2384.74	78.0995
2386.67	78.1971
2388.6	77.9389
2390.53	77.941
2392.46	78.5733
2394.39	79.1143
2396.32	78.7677
2398.25	77.9852
2400.18	77.847
2402.11	78.1254
2404.04	78.1289
2405.96	77.945
2407.89	77.9008
2409.82	77.8241
2411.75	77.828
2413.68	78.0313
2415.61	78.1786
2417.54	78.0678
2419.47	78.1538
2421.4	78.5756
2423.33	78.8721
2425.26	78.7511
2427.19	78.566
2429.12	78.3543
2431.05	78.1387
2432.98	78.3062
2434.91	78.9056
2436.84	79.1462
2438.77	78.8869
2440.7	78.6759
2442.63	78.6349
2444.56	78.4286
2446.49	78.284
2448.42	78.4087
2450.35	78.5355
2452.28	78.1986
2454.21	77.5935
2456.14	77.1678
2458.07	77.0919
2460	77.3068
2461.93	77.7084
2463.86	77.7613
2465.79	77.5732
2467.72	77.7001
2469.65	78.0837
2471.58	78.3796
2473.51	78.7306
2475.44	78.9977
2477.37	78.9315
2479.3	78.499
2481.23	78.1402
2483.16	78.1595
2485.09	78.4184
2487.02	78.6408
2488.95	78.8254
2490.88	78.7737
2492.81	78.5608
2494.74	78.4259
2496.67	78.3877
2498.6	78.1678
2500.53	77.8817
2502.46	77.8505
2504.39	78.1042
2506.32	78.1758
2508.25	78.0441
2510.18	78.1521
2512.11	78.7686
2514.04	79.2269
2515.96	78.9502
2517.89	78.4315
2519.82	78.4035
2521.75	78.6474
2523.68	78.9452
2525.61	79.3098
2527.54	79.6581
2529.47	79.6161
2531.4	79.1587
2533.33	78.7928
2535.26	78.966
2537.19	79.1809
2539.12	79.0015
2541.05	78.5782
2542.98	78.2
2544.91	77.9325
2546.84	78.0696
2548.77	78.5909
2550.7	79.1039
2552.63	79.3673
2554.56	79.5224
2556.49	79.344
2558.42	78.7422
2560.35	78.2025
2562.28	78.3769
2564.21	78.9458
2566.14	79.0648
2568.07	78.6097
2570	78.2549
2571.93	78.0279
2573.86	77.7868
2575.79	77.7762
2577.72	78.1112
2579.65	78.5077
2581.58	78.9927
2583.51	79.4183
2585.44	79.4727
2587.37	79.1041
2589.3	78.6243
2591.23	78.0676
2593.16	77.4584
2595.09	77.0894
2597.02	77.3087
2598.95	77.648
2600.88	77.6506
2602.81	77.717
2604.74	78.2012
2606.67	78.442
2608.6	78.3257
2610.53	78.2717
2612.46	77.9174
2614.39	77.0162
2616.32	76.5444
2618.25	76.6176
2620.18	76.5814
2622.11	76.7076
2624.04	77.5293
2625.96	78.4044
2627.89	78.6977
2629.82	78.6178
2631.75	78.5995
2633.68	78.3526
2635.61	77.6968
2637.54	77.1591
2639.47	77.1994
2641.4	77.3717
2643.33	77.5073
2645.26	77.959
2647.19	78.4732
2649.12	78.1847
2651.05	77.4198
2652.98	77.3833
2654.91	78.4531
2656.84	79.4255
2658.77	79.3881
2660.7	78.7833
2662.63	78.0955
2664.56	77.5456
2666.49	77.9278
2668.42	78.8573
2670.35	79.2042
2672.28	79.3409
2674.21	80.009
2676.14	80.3721
2678.07	79.782
2680	78.8599
2681.93	78.412
2683.86	78.4215
2685.79	78.6946
2687.72	79.0564
2689.65	79.3623
2691.58	79.4927
2693.51	79.333
2695.44	78.7551
2697.37	78.1757
2699.3	77.9355
2701.23	77.9464
2703.16	77.8935
2705.09	77.9321
2707.02	78.4391
2708.95	79.0511
2710.88	79.0674
2712.81	79.0079
2714.74	79.2111
2716.67	79.0879
2718.6	78.5007
2720.53	77.9479
2722.46	77.513
2724.39	77.1416
2726.32	76.9085
2728.25	77.1227
2730.18	77.5761
2732.11	77.7829
2734.04	78.0159
2735.96	78.6434
2737.89	78.8715
2739.82	78.3416
2741.75	77.763
2743.68	77.7583
2745.61	78.2568
2747.54	78.5727
2749.47	78.1301
2751.4	77.717
2753.33	77.8363
2755.26	77.822
2757.19	77.5199
2759.12	77.4869
2761.05	77.6365
2762.98	77.7376
2764.91	77.7117
2766.84	77.5526
2768.77	77.323
2770.7	77.3394
2772.63	77.7833
2774.56	78.2635
2776.49	78.1503
2778.42	77.802
2780.35	77.9285
2782.28	78.3848
2784.21	78.4472
2786.14	78.0056
2788.07	77.531
2790	77.6559
2791.93	78.2777
2793.86	78.4579
2795.79	77.9274
2797.72	77.5517
2799.65	77.5581
2801.58	77.7558
2803.51	78.083
2805.44	78.2138
2807.37	78.0706
2809.3	77.964
2811.23	77.4728
2813.16	76.346
2815.09	75.2509
2817.02	74.6844
2818.95	74.0089
2820.88	72.321
2822.81	69.8904
2824.74	68.2979
2826.67	68.4705
2828.6	69.4576
2830.53	69.621
2832.46	69.1094
2834.39	69.4511
2836.32	71.116
2838.25	72.8619
2840.18	73.6414
2842.11	73.951
2844.04	75.0731
2845.96	77.4286
2847.89	80.0539
2849.82	81.2464
2851.75	80.2691
2853.68	77.9218
2855.61	75.5981
2857.54	74.2711
2859.47	74.2014
2861.4	74.8639
2863.33	75.3093
2865.26	74.7837
2867.19	73.7715
2869.12	73.1911
2871.05	73.019
2872.98	73.0217
2874.91	73.185
2876.84	72.8937
2878.77	72.1002
2880.7	71.3457
2882.63	70.6805
2884.56	70.8999
2886.49	73.1218
2888.42	75.5659
2890.35	75.3537
2892.28	73.5908
2894.21	73.2335
2896.14	74.1141
2898.07	74.4139
2900	74.2551
2901.93	74.9777
2903.86	76.0326
2905.79	75.4705
2907.72	73.5826
2909.65	72.7879
2911.58	74.2077
2913.51	77.3335
2915.44	79.8958
2917.37	78.5714
2919.3	73.4191
2921.23	67.0979
2923.16	60.8133
2925.09	55.8704
2927.02	53.1897
2928.95	50.9803
2930.88	47.5727
2932.81	44.4441
2934.74	42.9719
2936.67	42.3862
2938.6	42.0726
2940.53	42.5988
2942.46	44.0364
2944.39	45.7671
2946.32	47.5548
2948.25	49.7237
2950.18	52.4607
2952.11	55.0492
2954.04	56.385
2955.96	56.7678
2957.89	57.425
2959.82	58.4509
2961.75	58.8448
2963.68	58.3716
2965.61	57.775
2967.54	57.5313
2969.47	57.5284
2971.4	57.4674
2973.33	57.0139
2975.26	55.987
2977.19	54.6794
2979.12	54.134
2981.05	54.8957
2982.98	55.6565
2984.91	55.0436
2986.84	53.8267
2988.77	53.0613
2990.7	52.5874
2992.63	52.2688
2994.56	52.403
2996.49	52.9051
2998.42	53.6759
3000.35	54.9069
3002.28	56.3402
3004.21	57.4795
3006.14	58.441
3008.07	59.4155
3010	60.4689
3011.93	61.905
3013.86	63.6883
3015.79	65.3096
3017.72	66.441
3019.65	67.0287
3021.58	67.5202
3023.51	68.5247
3025.44	70.0585
3027.37	71.6941
3029.3	72.8143
3031.23	73.0203
3033.16	72.8596
3035.09	73.1563
3037.02	74.2258
3038.95	75.7159
3040.88	76.6453
3042.81	76.5613
3044.74	76.2853
3046.67	76.3828
3048.6	76.4744
3050.53	76.8538
3052.46	78.4611
3054.39	80.2249
3056.32	80.231
3058.25	79.4898
3060.18	79.4905
3062.11	79.241
3064.04	78.3592
3065.96	78.2108
3067.89	79.083
3069.82	79.5949
3071.75	79.0272
3073.68	78.7758
3075.61	79.746
3077.54	80.3132
3079.47	79.9927
3081.4	80.4699
3083.33	81.1227
3085.26	80.1304
3087.19	78.5277
3089.12	77.6333
3091.05	76.859
3092.98	76.1706
3094.91	76.7504
3096.84	78.6193
3098.77	79.7852
3100.7	78.8651
3102.63	77.5597
3104.56	78.2087
3106.49	80.1537
3108.42	80.734
3110.35	79.675
3112.28	78.9511
3114.21	78.9043
3116.14	78.4228
3118.07	77.6171
3120	77.605
3121.93	78.4527
3123.86	79.0474
3125.79	79.1225
3127.72	79.1747
3129.65	79.0867
3131.58	79.1222
3133.51	79.6464
3135.44	79.7147
3137.37	78.9217
3139.3	78.2203
3141.23	77.8672
3143.16	77.3728
3145.09	77.0462
3147.02	77.4747
3148.95	78.1707
3150.88	78.4626
3152.81	78.1431
3154.74	76.4591
3156.67	74.1219
3158.6	73.6782
3160.53	75.0831
3162.46	75.8915
3164.39	75.7222
3166.32	75.8969
3168.25	77.083
3170.18	78.724
3172.11	79.3871
3174.04	79.002
3175.96	78.563
3177.89	77.7442
3179.82	76.518
3181.75	75.8428
3183.68	75.7902
3185.61	75.9958
3187.54	76.2581
3189.47	76.0062
3191.4	74.9635
3193.33	74.0308
3195.26	74.7306
3197.19	76.6932
3199.12	77.387
3201.05	76.4274
3202.98	76.0436
3204.91	76.7985
3206.84	77.7511
3208.77	78.4466
3210.7	78.4979
3212.63	77.9414
3214.56	77.1694
3216.49	75.4926
3218.42	73.3779
3220.35	73.2706
3222.28	75.3259
3224.21	77.4222
3226.14	79.4091
3228.07	81.6238
3230	82.5329
3231.93	81.5475
3233.86	79.6628
3235.79	77.9594
3237.72	77.6309
3239.65	78.1278
3241.58	77.6835
3243.51	76.9936
3245.44	77.3575
3247.37	78.0215
3249.3	78.8695
3251.23	80.255
3253.16	81.1894
3255.09	81.3934
3257.02	81.5463
3258.95	81.6288
3260.88	81.8296
3262.81	82.1822
3264.74	81.9164
3266.67	81.4048
3268.6	81.6397
3270.53	81.472
3272.46	80.0961
3274.39	79.3169
3276.32	79.8433
3278.25	80.3974
3280.18	80.6093
3282.11	80.473
3284.04	79.9881
3285.96	79.6306
3287.89	79.0285
3289.82	78.1406
3291.75	78.1138
3293.68	78.1018
3295.61	76.6041
3297.54	74.7899
3299.47	73.7926
3301.4	73.1687
3303.33	73.0134
3305.26	73.607
3307.19	74.7621
3309.12	75.598
3311.05	74.7205
3312.98	72.4458
3314.91	70.6056
3316.84	69.2488
3318.77	66.6233
3320.7	62.4373
3322.63	59.2805
3324.56	58.5142
3326.49	57.7998
3328.42	55.5407
3330.35	53.768
3332.28	53.5021
3334.21	53.062
3336.14	51.3883
3338.07	49.6904
3340	49.1933
3341.93	49.3275
3343.86	49.1024
3345.79	49.297
3347.72	50.4391
3349.65	51.0755
3351.58	50.7461
3353.51	51.1309
3355.44	52.59
3357.37	53.6732
3359.3	54.0728
3361.23	55.2289
3363.16	57.3673
3365.09	59.454
3367.02	61.8447
3368.95	64.8633
3370.88	66.8179
3372.81	67.7936
3374.74	69.7825
3376.67	72.1792
3378.6	72.3934
3380.53	70.4608
3382.46	69.3573
3384.39	71.1908
3386.32	74.4234
3388.25	76.051
3390.18	75.5792
3392.11	74.5987
3394.04	73.9273
3395.96	73.4989
3397.89	72.9183
3399.82	72.0007
3401.75	71.2253
3403.68	71.3335
3405.61	71.5352
3407.54	70.4174
3409.47	68.8095
3411.4	68.7257
3413.33	69.782
3415.26	70.0704
3417.19	69.223
3419.12	68.7373
3421.05	69.4545
3422.98	70.4436
3424.91	70.0299
3426.84	68.5476
3428.77	68.3024
3430.7	69.4568
3432.63	68.76
3434.56	65.9146
3436.49	64.5497
3438.42	65.4284
3440.35	65.6719
3442.28	64.4526
3444.21	63.7875
3446.14	64.668
3448.07	66.0088
3450	66.6542
3451.93	66.4818
3453.86	66.8269
3455.79	68.6949
3457.72	71.4457
3459.65	74.0015
3461.58	75.0722
3463.51	73.6925
3465.44	72.1091
3467.37	71.9274
3469.3	71.9434
3471.23	71.9491
3473.16	72.6482
3475.09	73.4857
3477.02	74.096
3478.95	74.4323
3480.88	74.9166
3482.81	75.5861
3484.74	76.3193
3486.67	77.6713
3488.6	78.6538
3490.53	77.6906
3492.46	77.1604
3494.39	79.1292
3496.32	81.7271
3498.25	82.042
3500.18	80.3307
3502.11	79.7735
3504.04	81.2634
3505.96	81.4331
3507.89	79.791
3509.82	78.7487
3511.75	77.7563
3513.68	75.8426
3515.61	74.7832
3517.54	75.1823
3519.47	76.0062
3521.4	76.2289
3523.33	75.6627
3525.26	75.3186
3527.19	76.0761
3529.12	76.6711
3531.05	76.1871
3532.98	75.5472
3534.91	76.081
3536.84	77.6492
3538.77	78.6981
3540.7	77.9987
3542.63	76.9247
3544.56	77.2163
3546.49	78.482
3548.42	78.7642
3550.35	77.816
3552.28	76.8726
3554.21	76.4295
3556.14	75.9159
3558.07	75.6738
3560	76.5645
3561.93	78.4976
3563.86	79.8255
3565.79	79.8267
3567.72	79.2637
3569.65	78.8885
3571.58	78.3761
3573.51	77.6064
3575.44	76.7559
3577.37	75.7247
3579.3	74.4409
3581.23	74.0543
3583.16	74.5861
3585.09	75.3664
3587.02	76.5693
3588.95	77.3771
3590.88	76.5523
3592.81	76.2999
3594.74	77.835
3596.67	78.6816
3598.6	77.7459
3600.53	77.8298
3602.46	79.4425
3604.39	80.0604
3606.32	79.7115
3608.25	80.5734
3610.18	81.5519
3612.11	81.6961
3614.04	82.19
3615.96	83.0329
3617.89	82.6982
3619.82	81.0648
3621.75	78.7898
3623.68	76.6082
3625.61	75.3564
3627.54	76.178
3629.47	77.8544
3631.4	78.5749
3633.33	78.6923
3635.26	78.5101
3637.19	77.9459
3639.12	78.7883
3641.05	80.5374
3642.98	81.0163
3644.91	80.2425
3646.84	80.4834
3648.77	82.8033
3650.7	84.4292
3652.63	81.9366
3654.56	78.7687
3656.49	78.6137
3658.42	79.457
3660.35	78.6117
3662.28	77.5903
3664.21	77.9084
3666.14	79.6683
3668.07	82.7385
3670	85.468
3671.93	84.7627
3673.86	82.7556
3675.79	82.7686
3677.72	82.9228
3679.65	80.8321
3681.58	78.5886
3683.51	78.0662
3685.44	79.7946
3687.37	82.5525
3689.3	83.5142
3691.23	81.452
3693.16	78.7114
3695.09	76.9724
3697.02	76.9084
3698.95	78.3557
3700.88	79.7648
3702.81	79.2958
3704.74	78.0781
3706.67	78.0186
3708.6	79.6113
3710.53	81.4377
3712.46	82.0239
3714.39	80.7728
3716.32	79.1668
3718.25	78.9044
3720.18	79.5153
3722.11	78.5013
3724.04	76.556
3725.96	75.774
3727.89	75.8311
3729.82	76.2983
3731.75	78.9716
3733.68	82.6126
3735.61	83.8821
3737.54	82.179
3739.47	79.7627
3741.4	79.8613
3743.33	84.3192
3745.26	87.2997
3747.19	84.7453
3749.12	83.9434
3751.05	88.0995
3752.98	88.6085
3754.91	83.035
3756.84	78.686
3758.77	78.6593
3760.7	79.9496
3762.63	80.2968
3764.56	79.688
3766.49	78.9613
3768.42	78.2352
3770.35	77.9109
3772.28	77.9657
3774.21	78.421
3776.14	78.6605
3778.07	78.3197
3780	77.3283
3781.93	76.484
3783.86	76.1565
3785.79	76.0234
3787.72	75.8025
3789.65	76.6919
3791.58	78.154
3793.51	79.3805
3795.44	80.4405
3797.37	80.9041
3799.3	81.2602
3801.23	83.2251
3803.16	84.279
3805.09	82.4536
3807.02	79.3183
3808.95	76.5554
3810.88	75.5857
3812.81	77.909
3814.74	80.578
3816.67	80.1429
3818.6	79.343
3820.53	81.728
3822.46	82.8963
3824.39	80.1107
3826.32	77.7846
3828.25	77.8241
3830.18	78.0747
3832.11	77.9759
3834.04	77.33
3835.96	78.2119
3837.89	81.1699
3839.82	82.3404
3841.75	80.4779
3843.68	79.2482
3845.61	79.3166
3847.54	80.2683
3849.47	82.8873
3851.4	88.5085
3853.33	93.3912
3855.26	90.0722
3857.19	81.298
3859.12	77.1714
3861.05	77.9715
3862.98	78.8422
3864.91	78.7006
3866.84	79.5236
3868.77	81.087
3870.7	81.3187
3872.63	79.3729
3874.56	78.2338
3876.49	79.1041
3878.42	81.3282
3880.35	83.6659
3882.28	84.7306
3884.21	83.9856
3886.14	82.1444
3888.07	79.5101
3890	78.7743
3891.93	79.8498
3893.86	79.4658
3895.79	78.1443
3897.72	79.1835
3899.65	81.4941
3901.58	83.8148
3903.51	85.6799
3905.44	85.091
3907.37	81.4672
3909.3	79.0186
3911.23	79.1617
3913.16	79.9107
3915.09	80.5968
3917.02	82.491
3918.95	84.2638
3920.88	84.3791
3922.81	82.3585
3924.74	79.5404
3926.67	77.8031
3928.6	78.8943
3930.53	81.9926
3932.46	83.8732
3934.39	81.6925
3936.32	78.8284
3938.25	78.6662
3940.18	79.7848
3942.11	79.7507
3944.04	79.5477
3945.96	79.3922
3947.89	79.2981
3949.82	78.9382
3951.75	77.8026
3953.68	76.672
3955.61	77.4426
3957.54	78.7036
3959.47	79.3067
3961.4	79.6799
3963.33	79.9305
3965.26	79.2159
3967.19	78.3873
3969.12	78.2712
3971.05	79.274
3972.98	80.2823
3974.91	80.7888
3976.84	80.5232
3978.77	79.8497
3980.7	79.2166
3982.63	79.6025
3984.56	79.8417
3986.49	78.8155
3988.42	77.9441
3990.35	79.2344
3992.28	80.6793
3994.21	80.9245
3996.14	79.9948
3998.07	79.7704
4000	84.1577

## Sheet: 11
wavenumber	Transmission
700	94.8966
701.93	92.8255
703.86	91.3496
705.789	89.2182
707.719	86.1047
709.649	82.2107
711.579	78.0793
713.509	75.1561
715.439	74.4258
717.368	76.0188
719.298	79.1789
721.228	82.818
723.158	86.0047
725.088	88.5665
727.018	90.4603
728.947	91.7816
730.877	92.5937
732.807	92.9673
734.737	93.0098
736.667	93.2189
738.596	93.5838
740.526	93.9135
742.456	93.9127
744.386	93.4337
746.316	92.6456
748.246	92.0276
750.175	91.3822
752.105	90.2793
754.035	88.5466
755.965	86.8035
757.895	85.6752
759.825	85.4461
761.754	85.9063
763.684	86.7184
765.614	87.4282
767.544	87.9758
769.474	88.3309
771.404	88.6489
773.333	89.0906
775.263	89.7452
777.193	90.3047
779.123	90.7471
781.053	91.1633
782.982	91.5164
784.912	91.6314
786.842	91.8187
788.772	92.0668
790.702	92.099
792.632	91.817
794.561	91.6137
796.491	91.6734
798.421	91.9057
800.351	91.9031
802.281	91.7594
804.211	91.7075
806.14	91.7856
808.07	91.781
810	91.6819
811.93	91.3275
813.86	90.7792
815.789	90.1374
817.719	89.4647
819.649	88.404
821.579	86.7437
823.509	84.7131
825.439	83.0296
827.368	82.0108
829.298	81.589
831.228	81.4803
833.158	81.7342
835.088	82.4247
837.018	83.5885
838.947	85.1342
840.877	87.1038
842.807	89.1476
844.737	90.7857
846.667	91.7354
848.596	92.2325
850.526	92.4734
852.456	92.7237
854.386	93.0022
856.316	93.1995
858.246	93.2132
860.175	93.286
862.105	93.3436
864.035	93.2967
865.965	93.1921
867.895	93.1819
869.825	93.091
871.754	92.9635
873.684	92.9259
875.614	93.0033
877.544	92.9346
879.474	92.7499
881.404	92.4041
883.333	91.9299
885.263	91.3471
887.193	90.4771
889.123	88.7287
891.053	85.8439
892.982	81.7852
894.912	76.9443
896.842	71.993
898.772	67.7475
900.702	64.7904
902.632	63.7609
904.561	65.2452
906.491	69.4286
908.421	75.3616
910.351	81.4358
912.281	86.3172
914.211	89.6813
916.14	91.7155
918.07	92.8596
920	93.4613
921.93	93.8641
923.86	94.0668
925.789	94.1127
927.719	94.0666
929.649	93.9761
931.579	93.5609
933.509	92.6862
935.439	91.1328
937.368	88.4914
939.298	84.1825
941.228	78.2066
943.158	71.2698
945.088	64.7929
947.018	60.1523
948.947	58.2891
950.877	59.4092
952.807	63.0785
954.737	68.2371
956.667	73.787
958.596	78.8971
960.526	83.1791
962.456	86.4453
964.386	88.8852
966.316	90.673
968.246	91.9094
970.175	92.5762
972.105	92.7518
974.035	92.326
975.965	91.2923
977.895	89.6268
979.825	87.2883
981.754	83.9242
983.684	79.494
985.614	74.6613
987.544	70.5404
989.474	67.9181
991.404	67.2824
993.333	68.3921
995.263	70.1353
997.193	70.7964
999.123	68.8505
1001.05	63.5633
1002.98	55.7325
1004.91	47.2076
1006.84	39.9164
1008.77	34.9705
1010.7	32.6475
1012.63	32.6877
1014.56	34.6043
1016.49	37.422
1018.42	39.4023
1020.35	38.4971
1022.28	34.1072
1024.21	27.8152
1026.14	22.0338
1028.07	18.2879
1030	16.9796
1031.93	18.0178
1033.86	21.4384
1035.79	27.3985
1037.72	35.6863
1039.65	45.2416
1041.58	54.639
1043.51	62.7819
1045.44	69.2033
1047.37	73.9221
1049.3	77.4176
1051.23	79.9683
1053.16	81.6321
1055.09	82.6229
1057.02	83.2492
1058.95	83.4905
1060.88	83.4727
1062.81	83.1279
1064.74	82.1594
1066.67	80.2983
1068.6	77.2089
1070.53	72.1369
1072.46	64.4548
1074.39	54.0437
1076.32	42.1904
1078.25	31.4602
1080.18	23.9161
1082.11	19.9301
1084.04	18.964
1085.96	20.4678
1087.89	24.2231
1089.82	30.186
1091.75	38.0853
1093.68	47.0475
1095.61	55.8988
1097.54	63.5113
1099.47	69.2037
1101.4	73.0102
1103.33	75.5431
1105.26	77.3378
1107.19	78.7363
1109.12	79.7137
1111.05	80.1178
1112.98	79.8896
1114.91	79.1403
1116.84	77.784
1118.77	75.7819
1120.7	73.2638
1122.63	70.6168
1124.56	68.3456
1126.49	66.8855
1128.42	66.1651
1130.35	65.8104
1132.28	65.3909
1134.21	64.7723
1136.14	64.1088
1138.07	63.6131
1140	63.2961
1141.93	63.1975
1143.86	63.3043
1145.79	63.6065
1147.72	64.1298
1149.65	64.9731
1151.58	66.1313
1153.51	67.5461
1155.44	69.1034
1157.37	70.8337
1159.3	72.7292
1161.23	74.6692
1163.16	76.4932
1165.09	78.2356
1167.02	79.9385
1168.95	81.5807
1170.88	82.9476
1172.81	83.8584
1174.74	84.1992
1176.67	83.9932
1178.6	83.3128
1180.53	82.2314
1182.46	80.585
1184.39	78.3426
1186.32	75.649
1188.25	72.5442
1190.18	69.0091
1192.11	65.4434
1194.04	62.3672
1195.96	60.2965
1197.89	59.7914
1199.82	61.172
1201.75	64.111
1203.68	67.9912
1205.61	72.1679
1207.54	76.0089
1209.47	79.0468
1211.4	81.3788
1213.33	83.3605
1215.26	85.1071
1217.19	86.4246
1219.12	87.4395
1221.05	88.5055
1222.98	89.6861
1224.91	90.6491
1226.84	91.23
1228.77	91.5275
1230.7	91.7195
1232.63	91.8106
1234.56	91.8501
1236.49	91.885
1238.42	91.8316
1240.35	91.5444
1242.28	91.0556
1244.21	90.1895
1246.14	88.549
1248.07	85.8833
1250	82.5437
1251.93	79.6026
1253.86	78.4747
1255.79	79.783
1257.72	82.8276
1259.65	86.0798
1261.58	88.4082
1263.51	89.7046
1265.44	90.5237
1267.37	91.2069
1269.3	91.705
1271.23	91.8935
1273.16	91.9479
1275.09	92.1238
1277.02	92.3968
1278.95	92.3649
1280.88	91.8189
1282.81	90.9396
1284.74	89.8827
1286.67	88.5604
1288.6	87.1537
1290.53	86.0883
1292.46	85.6402
1294.39	85.7869
1296.32	86.3415
1298.25	86.8928
1300.18	87.0453
1302.11	86.7282
1304.04	86.221
1305.96	85.8345
1307.89	85.8315
1309.82	86.2851
1311.75	87.0263
1313.68	87.8211
1315.61	88.6335
1317.54	89.4704
1319.47	90.2833
1321.4	90.9789
1323.33	91.5379
1325.26	92.0013
1327.19	92.4074
1329.12	92.7025
1331.05	92.8931
1332.98	93.0313
1334.91	93.1307
1336.84	93.159
1338.77	93.1762
1340.7	93.265
1342.63	93.3882
1344.56	93.3638
1346.49	93.1605
1348.42	92.9442
1350.35	92.8963
1352.28	93.0559
1354.21	93.2805
1356.14	93.3629
1358.07	93.3487
1360	93.3368
1361.93	93.2589
1363.86	93.1095
1365.79	92.9647
1367.72	92.7232
1369.65	92.3114
1371.58	91.7495
1373.51	90.9287
1375.44	89.6742
1377.37	87.9097
1379.3	85.3394
1381.23	81.3946
1383.16	75.9631
1385.09	70.0928
1387.02	65.6489
1388.95	64.1742
1390.88	65.9846
1392.81	70.1664
1394.74	75.0907
1396.67	79.0462
1398.6	81.0066
1400.53	80.9451
1402.46	79.0011
1404.39	74.754
1406.32	67.5258
1408.25	57.1123
1410.18	44.972
1412.11	34.5098
1414.04	28.4384
1415.96	27.0161
1417.89	28.9299
1419.82	32.1495
1421.75	34.9401
1423.68	37.3215
1425.61	40.8657
1427.54	46.8515
1429.47	54.8693
1431.4	62.8405
1433.33	68.243
1435.26	69.5335
1437.19	67.1511
1439.12	63.004
1441.05	58.7145
1442.98	54.9729
1444.91	51.9847
1446.84	49.7195
1448.77	47.9078
1450.7	46.0389
1452.63	43.5964
1454.56	40.2556
1456.49	36.0587
1458.42	31.7374
1460.35	28.3036
1462.28	26.3347
1464.21	26.0665
1466.14	27.5344
1468.07	30.3075
1470	33.3674
1471.93	35.362
1473.86	34.9543
1475.79	31.4546
1477.72	25.7021
1479.65	19.9367
1481.58	16.1186
1483.51	14.9724
1485.44	16.6291
1487.37	21.2824
1489.3	28.9486
1491.23	38.6674
1493.16	48.3804
1495.09	56.4034
1497.02	62.4675
1498.95	67.0244
1500.88	70.5303
1502.81	73.3098
1504.74	75.5435
1506.67	77.4461
1508.6	79.1354
1510.53	80.5116
1512.46	81.4861
1514.39	82.1636
1516.32	82.6647
1518.25	83.0616
1520.18	83.4064
1522.11	83.786
1524.04	84.2205
1525.96	84.6367
1527.89	84.9765
1529.82	85.3068
1531.75	85.6322
1533.68	85.97
1535.61	86.3873
1537.54	86.7616
1539.47	86.9148
1541.4	87.0512
1543.33	87.3678
1545.26	87.7768
1547.19	88.1601
1549.12	88.429
1551.05	88.4286
1552.98	88.2889
1554.91	88.2871
1556.84	88.3415
1558.77	88.1975
1560.7	88.0355
1562.63	88.0497
1564.56	88.1208
1566.49	88.1209
1568.42	87.9294
1570.35	87.4331
1572.28	86.8721
1574.21	86.3038
1576.14	85.4635
1578.07	84.4279
1580	83.4287
1581.93	82.2215
1583.86	80.6789
1585.79	79.1164
1587.72	77.7687
1589.65	76.5461
1591.58	75.3835
1593.51	74.3127
1595.44	73.3923
1597.37	72.6303
1599.3	72.132
1601.23	72.0234
1603.16	72.2325
1605.09	72.4664
1607.02	72.5053
1608.95	72.2084
1610.88	71.4694
1612.81	70.1661
1614.74	68.2533
1616.67	65.8611
1618.6	63.3442
1620.53	61.0152
1622.46	59.0804
1624.39	57.7345
1626.32	57.1785
1628.25	57.485
1630.18	58.6475
1632.11	60.5463
1634.04	63.0173
1635.96	65.9008
1637.89	69.0046
1639.82	72.0667
1641.75	74.9417
1643.68	77.4961
1645.61	79.6196
1647.54	81.3885
1649.47	82.9774
1651.4	84.2881
1653.33	85.235
1655.26	85.9777
1657.19	86.7152
1659.12	87.428
1661.05	88.0021
1662.98	88.3786
1664.91	88.7578
1666.84	89.2014
1668.77	89.5122
1670.7	89.6553
1672.63	89.8105
1674.56	89.9101
1676.49	89.8982
1678.42	89.9085
1680.35	90.0602
1682.28	90.2182
1684.21	90.2837
1686.14	90.37
1688.07	90.5876
1690	90.7783
1691.93	90.8838
1693.86	90.9742
1695.79	91.1189
1697.72	91.2872
1699.65	91.4128
1701.58	91.5242
1703.51	91.794
1705.44	92.1119
1707.37	92.297
1709.3	92.3483
1711.23	92.3418
1713.16	92.3241
1715.09	92.3484
1717.02	92.3046
1718.95	92.2549
1720.88	92.4122
1722.81	92.7642
1724.74	93.0529
1726.67	93.2445
1728.6	93.4048
1730.53	93.4911
1732.46	93.3978
1734.39	93.2919
1736.32	93.3925
1738.25	93.5769
1740.18	93.5168
1742.11	93.3558
1744.04	93.3558
1745.96	93.41
1747.89	93.2987
1749.82	93.0837
1751.75	92.8847
1753.68	92.8323
1755.61	92.9287
1757.54	93.061
1759.47	93.1027
1761.4	93.1248
1763.33	93.1947
1765.26	93.2765
1767.19	93.3256
1769.12	93.4142
1771.05	93.4295
1772.98	93.2799
1774.91	93.1201
1776.84	93.1288
1778.77	93.2139
1780.7	93.3258
1782.63	93.4426
1784.56	93.4894
1786.49	93.3941
1788.42	93.2733
1790.35	93.242
1792.28	93.3039
1794.21	93.3114
1796.14	93.2606
1798.07	93.2425
1800	93.272
1801.93	93.2863
1803.86	93.3605
1805.79	93.4784
1807.72	93.5745
1809.65	93.6456
1811.58	93.7303
1813.51	93.7809
1815.44	93.8448
1817.37	93.913
1819.3	93.9225
1821.23	93.8886
1823.16	93.9099
1825.09	93.9191
1827.02	93.9053
1828.95	93.8961
1830.88	93.855
1832.81	93.7772
1834.74	93.8265
1836.67	93.9561
1838.6	94.0084
1840.53	93.9567
1842.46	93.8902
1844.39	93.8395
1846.32	93.8904
1848.25	94.0088
1850.18	94.0953
1852.11	94.0937
1854.04	94.041
1855.96	93.9374
1857.89	93.8627
1859.82	93.9087
1861.75	94.1091
1863.68	94.3364
1865.61	94.4845
1867.54	94.4487
1869.47	94.2563
1871.4	94.0869
1873.33	94.0242
1875.26	93.9098
1877.19	93.8245
1879.12	93.865
1881.05	93.865
1882.98	93.7709
1884.91	93.8249
1886.84	93.9615
1888.77	93.9123
1890.7	93.6567
1892.63	93.47
1894.56	93.4441
1896.49	93.4244
1898.42	93.3222
1900.35	93.3008
1902.28	93.2902
1904.21	93.078
1906.14	92.7577
1908.07	92.6104
1910	92.6339
1911.93	92.7402
1913.86	92.8208
1915.79	92.7865
1917.72	92.6959
1919.65	92.7633
1921.58	92.9832
1923.51	93.2175
1925.44	93.3809
1927.37	93.4546
1929.3	93.3592
1931.23	93.1252
1933.16	92.8867
1935.09	92.8423
1937.02	92.9875
1938.95	93.102
1940.88	93.0685
1942.81	93.1087
1944.74	93.3427
1946.67	93.6355
1948.6	93.7816
1950.53	93.7525
1952.46	93.6399
1954.39	93.5909
1956.32	93.6118
1958.25	93.6114
1960.18	93.538
1962.11	93.5252
1964.04	93.6286
1965.96	93.755
1967.89	93.8018
1969.82	93.7886
1971.75	93.7088
1973.68	93.588
1975.61	93.4826
1977.54	93.4867
1979.47	93.5695
1981.4	93.5725
1983.33	93.415
1985.26	93.3127
1987.19	93.3726
1989.12	93.468
1991.05	93.5383
1992.98	93.666
1994.91	93.7619
1996.84	93.7176
1998.77	93.5889
2000.7	93.5245
2002.63	93.4658
2004.56	93.2788
2006.49	93.0411
2008.42	92.9873
2010.35	93.0778
2012.28	93.1329
2014.21	93.0948
2016.14	92.9867
2018.07	92.7913
2020	92.6121
2021.93	92.5055
2023.86	92.3873
2025.79	92.2183
2027.72	92.1136
2029.65	92.1039
2031.58	92.1927
2033.51	92.3623
2035.44	92.5048
2037.37	92.4895
2039.3	92.4021
2041.23	92.4207
2043.16	92.5982
2045.09	92.7688
2047.02	92.8346
2048.95	92.8603
2050.88	92.9102
2052.81	92.9578
2054.74	93.036
2056.67	93.1593
2058.6	93.3265
2060.53	93.4631
2062.46	93.4039
2064.39	93.1115
2066.32	92.9
2068.25	92.9812
2070.18	93.1722
2072.11	93.245
2074.04	93.2564
2075.96	93.2857
2077.89	93.3487
2079.82	93.4183
2081.75	93.4442
2083.68	93.4148
2085.61	93.3534
2087.54	93.1714
2089.47	92.9111
2091.4	92.8135
2093.33	92.9799
2095.26	93.1669
2097.19	93.1856
2099.12	93.1636
2101.05	93.2665
2102.98	93.374
2104.91	93.3487
2106.84	93.2274
2108.77	93.1029
2110.7	93.0128
2112.63	92.9855
2114.56	92.9992
2116.49	93.0527
2118.42	93.144
2120.35	93.2268
2122.28	93.2318
2124.21	93.1659
2126.14	93.1591
2128.07	93.3632
2130	93.6036
2131.93	93.5925
2133.86	93.4335
2135.79	93.4225
2137.72	93.4955
2139.65	93.4237
2141.58	93.2703
2143.51	93.2486
2145.44	93.2975
2147.37	93.3001
2149.3	93.3172
2151.23	93.3337
2153.16	93.1629
2155.09	92.8722
2157.02	92.8449
2158.95	93.1576
2160.88	93.4171
2162.81	93.532
2164.74	93.6824
2166.67	93.7434
2168.6	93.6426
2170.53	93.6239
2172.46	93.7052
2174.39	93.6771
2176.32	93.5518
2178.25	93.5837
2180.18	93.8686
2182.11	94.1784
2184.04	94.2366
2185.96	94.0182
2187.89	93.6759
2189.82	93.3963
2191.75	93.3052
2193.68	93.3356
2195.61	93.2846
2197.54	93.1711
2199.47	93.1442
2201.4	93.1526
2203.33	93.1525
2205.26	93.2128
2207.19	93.2249
2209.12	93.1467
2211.05	93.2152
2212.98	93.4929
2214.91	93.7694
2216.84	93.9199
2218.77	93.8983
2220.7	93.7633
2222.63	93.7418
2224.56	93.8693
2226.49	93.908
2228.42	93.7583
2230.35	93.5905
2232.28	93.6018
2234.21	93.7748
2236.14	93.8965
2238.07	93.8255
2240	93.717
2241.93	93.8508
2243.86	94.109
2245.79	94.1114
2247.72	93.9088
2249.65	93.813
2251.58	93.8376
2253.51	93.7941
2255.44	93.625
2257.37	93.5785
2259.3	93.8142
2261.23	94.0495
2263.16	94.0771
2265.09	93.9982
2267.02	93.8466
2268.95	93.7145
2270.88	93.7777
2272.81	93.9872
2274.74	94.1356
2276.67	94.0778
2278.6	93.7863
2280.53	93.4352
2282.46	93.2462
2284.39	93.2165
2286.32	93.2393
2288.25	93.3916
2290.18	93.6409
2292.11	93.7253
2294.04	93.6653
2295.96	93.7007
2297.89	93.7633
2299.82	93.7687
2301.75	93.8572
2303.68	94.0572
2305.61	94.1981
2307.54	94.2228
2309.47	94.2526
2311.4	94.2966
2313.33	94.2449
2315.26	94.2825
2317.19	94.4944
2319.12	94.5125
2321.05	94.233
2322.98	94.0341
2324.91	94.1381
2326.84	94.4894
2328.77	94.8063
2330.7	94.7859
2332.63	94.4939
2334.56	94.3158
2336.49	94.3717
2338.42	94.3725
2340.35	94.1969
2342.28	94.0642
2344.21	93.9681
2346.14	93.8669
2348.07	93.9413
2350	94.2294
2351.93	94.597
2353.86	94.9263
2355.79	95.0599
2357.72	94.986
2359.65	94.7476
2361.58	94.407
2363.51	94.1699
2365.44	94.0897
2367.37	93.864
2369.3	93.472
2371.23	93.4346
2373.16	93.9818
2375.09	94.4483
2377.02	94.3833
2378.95	94.2796
2380.88	94.4274
2382.81	94.4378
2384.74	94.3195
2386.67	94.3911
2388.6	94.5318
2390.53	94.5416
2392.46	94.5564
2394.39	94.5625
2396.32	94.4371
2398.25	94.2803
2400.18	94.2246
2402.11	94.1848
2404.04	94.0392
2405.96	93.8428
2407.89	93.8703
2409.82	94.0774
2411.75	94.0849
2413.68	93.884
2415.61	93.8422
2417.54	93.9854
2419.47	94.013
2421.4	93.7627
2423.33	93.4365
2425.26	93.2626
2427.19	93.3415
2429.12	93.6336
2431.05	93.9396
2432.98	94.1501
2434.91	94.4184
2436.84	94.6662
2438.77	94.6237
2440.7	94.297
2442.63	93.9857
2444.56	93.806
2446.49	93.677
2448.42	93.6594
2450.35	93.9839
2452.28	94.5815
2454.21	95.0205
2456.14	95.0247
2458.07	94.9327
2460	94.9895
2461.93	94.9094
2463.86	94.5971
2465.79	94.4065
2467.72	94.4202
2469.65	94.394
2471.58	94.1901
2473.51	93.9921
2475.44	93.902
2477.37	93.8859
2479.3	94.0716
2481.23	94.4533
2483.16	94.5693
2485.09	94.2602
2487.02	93.8553
2488.95	93.6267
2490.88	93.6863
2492.81	94.0789
2494.74	94.4755
2496.67	94.5907
2498.6	94.51
2500.53	94.1694
2502.46	93.4767
2504.39	93.0051
2506.32	93.1167
2508.25	93.3941
2510.18	93.5486
2512.11	93.7486
2514.04	93.9284
2515.96	93.9717
2517.89	93.9733
2519.82	93.9225
2521.75	93.7516
2523.68	93.7076
2525.61	93.7928
2527.54	93.7258
2529.47	93.5831
2531.4	93.5669
2533.33	93.6435
2535.26	94.0027
2537.19	94.5857
2539.12	94.8076
2541.05	94.4826
2542.98	94.1417
2544.91	94.0031
2546.84	93.662
2548.77	93.0839
2550.7	93.0721
2552.63	93.665
2554.56	93.8152
2556.49	93.3689
2558.42	93.2668
2560.35	93.6472
2562.28	93.8235
2564.21	93.4319
2566.14	92.7613
2568.07	92.1793
2570	91.7853
2571.93	91.5638
2573.86	91.7171
2575.79	92.3752
2577.72	93.2594
2579.65	93.8105
2581.58	93.7289
2583.51	93.1937
2585.44	92.7598
2587.37	92.7063
2589.3	92.7909
2591.23	92.7243
2593.16	92.4632
2595.09	92.1685
2597.02	92.3046
2598.95	92.8372
2600.88	93.1225
2602.81	93.0572
2604.74	93.0374
2606.67	93.0408
2608.6	93.019
2610.53	92.9882
2612.46	92.8923
2614.39	92.8966
2616.32	93.0361
2618.25	92.8793
2620.18	92.4728
2622.11	92.2919
2624.04	92.3568
2625.96	92.3983
2627.89	92.4602
2629.82	92.6165
2631.75	92.7943
2633.68	92.8156
2635.61	92.6283
2637.54	92.4971
2639.47	92.6595
2641.4	92.8185
2643.33	92.7472
2645.26	92.6422
2647.19	92.6708
2649.12	92.7874
2651.05	92.9914
2652.98	93.1768
2654.91	93.1275
2656.84	92.7073
2658.77	92.0084
2660.7	91.2936
2662.63	91.1265
2664.56	91.86
2666.49	92.9552
2668.42	93.4947
2670.35	93.3053
2672.28	92.8531
2674.21	92.6743
2676.14	92.8853
2678.07	93.0901
2680	92.9185
2681.93	92.7107
2683.86	92.9561
2685.79	93.3948
2687.72	93.4388
2689.65	93.1859
2691.58	93.0247
2693.51	93.1361
2695.44	93.4642
2697.37	93.7175
2699.3	93.7356
2701.23	93.7429
2703.16	93.6758
2705.09	93.3111
2707.02	92.8915
2708.95	92.8214
2710.88	92.9304
2712.81	92.7541
2714.74	92.3263
2716.67	92.1676
2718.6	92.3554
2720.53	92.6354
2722.46	92.8912
2724.39	92.9974
2726.32	93.0479
2728.25	93.3661
2730.18	93.6331
2732.11	93.4715
2734.04	93.0591
2735.96	92.4555
2737.89	91.7426
2739.82	91.4806
2741.75	91.8577
2743.68	92.4552
2745.61	92.897
2747.54	93.1917
2749.47	93.3752
2751.4	93.3442
2753.33	93.1293
2755.26	93.0346
2757.19	93.1477
2759.12	93.1589
2761.05	92.729
2762.98	92.0131
2764.91	91.5428
2766.84	91.6459
2768.77	92.105
2770.7	92.5318
2772.63	92.5901
2774.56	92.1238
2776.49	91.5019
2778.42	91.3838
2780.35	91.7741
2782.28	92.2502
2784.21	92.7818
2786.14	93.4132
2788.07	93.6477
2790	93.3725
2791.93	93.3112
2793.86	93.684
2795.79	93.8475
2797.72	93.5841
2799.65	93.0316
2801.58	92.1819
2803.51	91.2579
2805.44	90.7398
2807.37	90.8252
2809.3	90.9954
2811.23	90.4519
2813.16	89.5411
2815.09	89.031
2817.02	88.3947
2818.95	86.8811
2820.88	85.1136
2822.81	84.0129
2824.74	83.5638
2826.67	83.2052
2828.6	82.7823
2830.53	82.6355
2832.46	83.1378
2834.39	84.2318
2836.32	85.3533
2838.25	86.1842
2840.18	87.118
2842.11	88.1642
2844.04	88.7462
2845.96	88.8775
2847.89	89.2066
2849.82	90.1516
2851.75	91.551
2853.68	92.5147
2855.61	92.2263
2857.54	90.975
2859.47	89.6668
2861.4	88.7192
2863.33	87.8988
2865.26	87.036
2867.19	86.55
2869.12	86.2264
2871.05	84.9157
2872.98	82.9272
2874.91	81.9717
2876.84	82.2529
2878.77	82.737
2880.7	83.0635
2882.63	83.2179
2884.56	83.1426
2886.49	83.3004
2888.42	83.8832
2890.35	84.2527
2892.28	84.1671
2894.21	84.0345
2896.14	83.7294
2898.07	83.2492
2900	83.3932
2901.93	84.1793
2903.86	84.698
2905.79	85.0026
2907.72	85.7591
2909.65	86.6418
2911.58	86.6847
2913.51	85.7339
2915.44	84.5193
2917.37	83.546
2919.3	82.7913
2921.23	81.8366
2923.16	79.8109
2925.09	76.5858
2927.02	73.2692
2928.95	70.6044
2930.88	68.3223
2932.81	65.9936
2934.74	63.8967
2936.67	63.058
2938.6	63.9289
2940.53	65.8108
2942.46	68.0435
2944.39	70.5133
2946.32	73.0559
2948.25	75.4133
2950.18	77.3444
2952.11	78.7642
2954.04	80.0494
2955.96	81.4731
2957.89	82.1645
2959.82	81.0971
2961.75	79.1884
2963.68	77.9802
2965.61	77.2404
2967.54	76.2181
2969.47	75.2595
2971.4	74.804
2973.33	74.7005
2975.26	74.7842
2977.19	74.959
2979.12	74.7361
2981.05	73.7964
2982.98	72.9709
2984.91	72.8168
2986.84	72.3455
2988.77	71.2747
2990.7	70.8436
2992.63	71.2564
2994.56	71.5803
2996.49	71.717
2998.42	72.2081
3000.35	73.061
3002.28	73.7627
3004.21	74.2627
3006.14	75.2346
3008.07	76.6122
3010	77.539
3011.93	78.4728
3013.86	80.4179
3015.79	82.6113
3017.72	83.9538
3019.65	84.8531
3021.58	85.6966
3023.51	86.3474
3025.44	87.2125
3027.37	88.6144
3029.3	90.0263
3031.23	90.6073
3033.16	90.0549
3035.09	89.26
3037.02	89.2233
3038.95	89.5432
3040.88	89.5653
3042.81	89.8933
3044.74	90.9714
3046.67	91.991
3048.6	92.3671
3050.53	92.2899
3052.46	91.6602
3054.39	90.63
3056.32	89.9656
3058.25	89.9233
3060.18	90.1877
3062.11	90.4649
3064.04	90.512
3065.96	90.3731
3067.89	90.2539
3069.82	90.2612
3071.75	90.4624
3073.68	90.9371
3075.61	91.6209
3077.54	92.0112
3079.47	91.8016
3081.4	91.8047
3083.33	92.4895
3085.26	92.827
3087.19	92.0599
3089.12	90.9978
3091.05	90.6341
3092.98	90.8785
3094.91	91.1431
3096.84	91.4868
3098.77	92.0555
3100.7	92.4497
3102.63	92.7246
3104.56	93.4035
3106.49	94.117
3108.42	94.0942
3110.35	93.3555
3112.28	92.4873
3114.21	91.8901
3116.14	91.5609
3118.07	91.4433
3120	91.7195
3121.93	92.2975
3123.86	92.7833
3125.79	92.7975
3127.72	92.2035
3129.65	91.5403
3131.58	91.4045
3133.51	91.3121
3135.44	90.8052
3137.37	90.6029
3139.3	91.3683
3141.23	92.364
3143.16	92.4092
3145.09	91.7549
3147.02	91.7143
3148.95	92.3632
3150.88	92.6643
3152.81	92.4916
3154.74	92.5175
3156.67	92.8232
3158.6	93.1594
3160.53	93.246
3162.46	92.8766
3164.39	92.3691
3166.32	91.9595
3168.25	91.3361
3170.18	90.8874
3172.11	91.2869
3174.04	91.9952
3175.96	92.1743
3177.89	92.0938
3179.82	92.0254
3181.75	91.6679
3183.68	91.3696
3185.61	91.9649
3187.54	92.961
3189.47	92.9541
3191.4	91.8188
3193.33	90.8654
3195.26	90.7283
3197.19	90.7235
3199.12	90.1749
3201.05	89.1391
3202.98	87.9552
3204.91	87.315
3206.84	87.7123
3208.77	88.5922
3210.7	88.9916
3212.63	89.1304
3214.56	90.0092
3216.49	91.2111
3218.42	91.1226
3220.35	90.0766
3222.28	89.9294
3224.21	91.1369
3226.14	92.5331
3228.07	92.9733
3230	92.4342
3231.93	91.8427
3233.86	91.9766
3235.79	92.9878
3237.72	94.0374
3239.65	94.3361
3241.58	94.4149
3243.51	94.4622
3245.44	93.8898
3247.37	93.5841
3249.3	94.2403
3251.23	94.7744
3253.16	94.9025
3255.09	95.2819
3257.02	95.4548
3258.95	95.0847
3260.88	94.4307
3262.81	93.7407
3264.74	93.7216
3266.67	94.3364
3268.6	94.2444
3270.53	93.3738
3272.46	92.5396
3274.39	91.6804
3276.32	90.9489
3278.25	90.877
3280.18	91.0919
3282.11	91.0799
3284.04	90.8897
3285.96	90.5667
3287.89	89.9556
3289.82	89.4528
3291.75	89.4769
3293.68	89.2498
3295.61	88.0626
3297.54	86.9865
3299.47	86.6971
3301.4	85.9947
3303.33	83.9326
3305.26	81.4624
3307.19	79.7124
3309.12	78.3522
3311.05	76.6809
3312.98	74.9416
3314.91	73.2728
3316.84	71.6739
3318.77	70.5326
3320.7	69.344
3322.63	67.0463
3324.56	64.388
3326.49	62.6236
3328.42	61.2906
3330.35	59.5845
3332.28	57.8641
3334.21	56.6312
3336.14	56.1393
3338.07	56.3097
3340	56.3711
3341.93	55.9494
3343.86	55.8451
3345.79	56.5549
3347.72	57.6218
3349.65	58.4913
3351.58	59.3285
3353.51	60.649
3355.44	62.4093
3357.37	64.1842
3359.3	65.8238
3361.23	67.1306
3363.16	68.4777
3365.09	70.7535
3367.02	73.3827
3368.95	75.0387
3370.88	76.5579
3372.81	78.9892
3374.74	80.9843
3376.67	81.4719
3378.6	81.7195
3380.53	82.8708
3382.46	84.6764
3384.39	85.7472
3386.32	84.8902
3388.25	83.3496
3390.18	83.2945
3392.11	84.4416
3394.04	85.2047
3395.96	85.1179
3397.89	84.6151
3399.82	84.1112
3401.75	83.6332
3403.68	82.609
3405.61	81.0442
3407.54	79.8308
3409.47	79.3297
3411.4	79.2705
3413.33	79.7779
3415.26	80.4448
3417.19	80.2287
3419.12	79.2008
3421.05	78.2779
3422.98	77.5559
3424.91	76.8924
3426.84	76.7552
3428.77	77.3719
3430.7	77.9946
3432.63	78.2632
3434.56	78.5746
3436.49	78.6785
3438.42	78.2059
3440.35	77.9294
3442.28	78.248
3444.21	78.5852
3446.14	78.7739
3448.07	79.3183
3450	80.4713
3451.93	81.9215
3453.86	82.7478
3455.79	82.4089
3457.72	81.791
3459.65	82.2422
3461.58	83.6688
3463.51	84.8544
3465.44	85.347
3467.37	85.9784
3469.3	87.2874
3471.23	88.8376
3473.16	89.9811
3475.09	90.847
3477.02	92.0967
3478.95	93.5382
3480.88	93.9332
3482.81	93.4107
3484.74	93.4082
3486.67	93.832
3488.6	93.5522
3490.53	93.1671
3492.46	93.4414
3494.39	93.2454
3496.32	92.0993
3498.25	91.8285
3500.18	93.0075
3502.11	93.7439
3504.04	93.2274
3505.96	92.5071
3507.89	91.8438
3509.82	91.3896
3511.75	91.6322
3513.68	92.2252
3515.61	92.9372
3517.54	93.5163
3519.47	92.8491
3521.4	91.6205
3523.33	91.4953
3525.26	92.1392
3527.19	92.845
3529.12	93.7025
3531.05	93.9552
3532.98	92.9036
3534.91	91.5076
3536.84	91.5199
3538.77	93.2354
3540.7	95.0071
3542.63	95.4019
3544.56	94.8433
3546.49	94.2621
3548.42	93.8865
3550.35	93.3992
3552.28	92.7429
3554.21	92.8135
3556.14	94.5287
3558.07	96.2764
3560	95.4096
3561.93	93.0137
3563.86	92.2625
3565.79	93.3042
3567.72	94.3058
3569.65	94.8512
3571.58	95.3077
3573.51	94.9748
3575.44	93.7061
3577.37	92.9264
3579.3	93.1338
3581.23	92.9618
3583.16	92.2549
3585.09	92.382
3587.02	93.0537
3588.95	92.9746
3590.88	92.7317
3592.81	93.0219
3594.74	93.2439
3596.67	93.2869
3598.6	93.2397
3600.53	92.5959
3602.46	91.9256
3604.39	92.242
3606.32	93.2087
3608.25	94.1532
3610.18	94.9035
3612.11	94.7119
3614.04	93.6234
3615.96	93.4481
3617.89	94.9345
3619.82	96.6516
3621.75	97.0255
3623.68	95.7586
3625.61	94.5832
3627.54	95.0113
3629.47	95.5999
3631.4	94.9833
3633.33	94.9374
3635.26	96.6464
3637.19	98.1437
3639.12	97.5299
3641.05	95.8152
3642.98	94.4728
3644.91	93.8179
3646.84	94.2333
3648.77	95.1485
3650.7	94.6991
3652.63	93.3038
3654.56	93.0022
3656.49	93.7345
3658.42	94.429
3660.35	95.1299
3662.28	95.5874
3664.21	95.1433
3666.14	94.3889
3668.07	93.9969
3670	93.4566
3671.93	92.7966
3673.86	92.2712
3675.79	91.3629
3677.72	90.8839
3679.65	92.3493
3681.58	94.7686
3683.51	96.1643
3685.44	96.2071
3687.37	95.4127
3689.3	94.7662
3691.23	95.2859
3693.16	96.2382
3695.09	96.3354
3697.02	95.7271
3698.95	94.6841
3700.88	93.3494
3702.81	92.9072
3704.74	93.6261
3706.67	94.3602
3708.6	94.9691
3710.53	95.5102
3712.46	95.0497
3714.39	94.0209
3716.32	93.7952
3718.25	94.1596
3720.18	94.3448
3722.11	94.8815
3724.04	96.3792
3725.96	97.796
3727.89	97.5705
3729.82	95.9628
3731.75	94.3257
3733.68	93.3315
3735.61	93.1504
3737.54	93.5922
3739.47	93.9068
3741.4	93.5874
3743.33	92.9065
3745.26	92.8038
3747.19	93.9518
3749.12	95.6519
3751.05	96.9883
3752.98	97.8621
3754.91	97.8745
3756.84	97.0677
3758.77	96.4808
3760.7	96.3922
3762.63	96.335
3764.56	95.7447
3766.49	94.3101
3768.42	93.0475
3770.35	92.9651
3772.28	93.7717
3774.21	95.0497
3776.14	95.8797
3778.07	94.8283
3780	92.6282
3781.93	91.6435
3783.86	92.5113
3785.79	93.9637
3787.72	95.0135
3789.65	95.4103
3791.58	95.0408
3793.51	94.4881
3795.44	94.3122
3797.37	93.9451
3799.3	93.4159
3801.23	93.8075
3803.16	94.8198
3805.09	95.1127
3807.02	94.5408
3808.95	93.9217
3810.88	93.9699
3812.81	94.8227
3814.74	95.8269
3816.67	96.4122
3818.6	96.5843
3820.53	96.6086
3822.46	96.7022
3824.39	96.4021
3826.32	95.2521
3828.25	94.1584
3830.18	94.1478
3832.11	95.1322
3834.04	96.1178
3835.96	96.0495
3837.89	95.4912
3839.82	95.5469
3841.75	95.4771
3843.68	94.8371
3845.61	94.712
3847.54	95.4853
3849.47	96.3596
3851.4	95.762
3853.33	93.1508
3855.26	91.1459
3857.19	91.6859
3859.12	93.3666
3861.05	94.7733
3862.98	96.0391
3864.91	97.1253
3866.84	97.4635
3868.77	96.3775
3870.7	94.401
3872.63	92.936
3874.56	92.1759
3876.49	91.9282
3878.42	92.8022
3880.35	94.5988
3882.28	96.1368
3884.21	96.427
3886.14	95.2529
3888.07	93.6474
3890	93.0222
3891.93	93.404
3893.86	93.6897
3895.79	93.24
3897.72	92.7864
3899.65	93.0978
3901.58	93.8295
3903.51	94.1538
3905.44	93.4218
3907.37	92.1307
3909.3	92.1075
3911.23	93.177
3913.16	93.1659
3915.09	92.3676
3917.02	92.6495
3918.95	93.5509
3920.88	93.7044
3922.81	93.1477
3924.74	92.786
3926.67	92.8798
3928.6	92.904
3930.53	92.9641
3932.46	93.6892
3934.39	94.33
3936.32	94.0905
3938.25	93.7511
3940.18	93.9507
3942.11	94.3822
3944.04	94.8146
3945.96	94.643
3947.89	93.4313
3949.82	92.0415
3951.75	91.3627
3953.68	91.0679
3955.61	90.9208
3957.54	91.0949
3959.47	91.2245
3961.4	90.6815
3963.33	89.8105
3965.26	89.5322
3967.19	89.9782
3969.12	90.4279
3971.05	90.8032
3972.98	91.1727
3974.91	91.2628
3976.84	91.7447
3978.77	93.1192
3980.7	93.9059
3982.63	93.152
3984.56	91.6087
3986.49	90.38
3988.42	90.3858
3990.35	91.3167
3992.28	91.818
3994.21	92.1781
3996.14	93.456
3998.07	95.435
4000	97.4015

## Sheet: S12
wavenumber	Transmission
700	96.7359
701.93	95.7321
703.86	95.6486
705.789	95.5895
707.719	95.5794
709.649	95.7065
711.579	95.9795
713.509	96.2797
715.439	96.4023
717.368	96.5246
719.298	96.6526
721.228	96.8252
723.158	96.9486
725.088	96.9559
727.018	96.7031
728.947	96.4405
730.877	96.2684
732.807	96.2027
734.737	96.1061
736.667	95.9408
738.596	95.6962
740.526	95.5572
742.456	95.4957
744.386	95.5716
746.316	95.7957
748.246	96.1219
750.175	96.3485
752.105	96.4586
754.035	96.4332
755.965	96.4035
757.895	96.1275
759.825	95.3963
761.754	93.9587
763.684	91.6304
765.614	88.9915
767.544	87.9283
769.474	89.4664
771.404	92.4453
773.333	94.7877
775.263	95.9617
777.193	96.4343
779.123	96.6372
781.053	96.6687
782.982	96.6782
784.912	96.6727
786.842	96.6539
788.772	96.4646
790.702	96.1448
792.632	95.627
794.561	94.8169
796.491	93.5494
798.421	92.0383
800.351	90.4735
802.281	88.9945
804.211	87.4571
806.14	85.8855
808.07	84.5025
810	83.5799
811.93	83.0717
813.86	82.9306
815.789	82.9516
817.719	83.1551
819.649	83.6056
821.579	84.2808
823.509	84.9481
825.439	85.5808
827.368	86.1026
829.298	86.4973
831.228	86.6516
833.158	86.4553
835.088	85.3662
837.018	82.6927
838.947	78.0571
840.877	72.2521
842.807	66.8513
844.737	63.3842
846.667	62.9352
848.596	66.2734
850.526	72.749
852.456	80.1037
854.386	85.9983
856.316	89.825
858.246	92.0876
860.175	93.4457
862.105	94.202
864.035	94.6889
865.965	95.0713
867.895	95.4353
869.825	95.6788
871.754	95.8972
873.684	96.0567
875.614	96.1666
877.544	96.236
879.474	96.3665
881.404	96.3838
883.333	96.2952
885.263	96.1874
887.193	96.2121
889.123	96.2772
891.053	96.291
892.982	96.1304
894.912	95.9417
896.842	95.6825
898.772	95.2844
900.702	94.5484
902.632	93.3518
904.561	91.4796
906.491	88.8369
908.421	85.5537
910.351	82.6376
912.281	81.4002
914.211	82.5928
916.14	85.6633
918.07	89.2193
920	91.7437
921.93	92.7644
923.86	92.5268
925.789	91.2968
927.719	88.9668
929.649	85.4525
931.579	80.6758
933.509	75.0436
935.439	69.2581
937.368	64.221
939.298	60.6052
941.228	58.7642
943.158	58.648
945.088	60.1917
947.018	63.2576
948.947	67.6181
950.877	72.7704
952.807	78.0808
954.737	82.6242
956.667	85.7687
958.596	87.4789
960.526	88.2647
962.456	88.4935
964.386	88.3688
966.316	87.7684
968.246	86.4022
970.175	83.7685
972.105	79.8405
974.035	75.077
975.965	70.35
977.895	66.4191
979.825	63.5992
981.754	61.3634
983.684	58.9336
985.614	56.2065
987.544	54.4671
989.474	55.5022
991.404	60.4174
993.333	68.5547
995.263	77.5247
997.193	84.6971
999.123	89.2441
1001.05	91.7785
1002.98	93.2626
1004.91	94.1337
1006.84	94.5556
1008.77	94.5153
1010.7	94.0499
1012.63	93.062
1014.56	91.5916
1016.49	89.451
1018.42	86.3436
1020.35	81.9095
1022.28	76.1526
1024.21	69.536
1026.14	63.2037
1028.07	58.4161
1030	56.1862
1031.93	56.7307
1033.86	59.171
1035.79	61.3982
1037.72	60.9385
1039.65	55.9375
1041.58	46.4317
1043.51	34.8747
1045.44	24.7385
1047.37	17.8964
1049.3	14.3225
1051.23	13.331
1053.16	14.4915
1055.09	17.7928
1057.02	23.5848
1058.95	32.1366
1060.88	42.8993
1062.81	54.153
1064.74	64.0638
1066.67	71.7804
1068.6	77.5425
1070.53	81.7644
1072.46	84.8778
1074.39	87.1857
1076.32	88.8517
1078.25	89.7605
1080.18	89.8452
1082.11	88.9023
1084.04	86.7189
1085.96	82.8072
1087.89	76.636
1089.82	68.1145
1091.75	58.673
1093.68	50.6338
1095.61	45.7587
1097.54	44.7
1099.47	47.6117
1101.4	54.2382
1103.33	63.5995
1105.26	73.5708
1107.19	81.8647
1109.12	87.3958
1111.05	90.6196
1112.98	92.372
1114.91	93.2971
1116.84	93.652
1118.77	93.6268
1120.7	93.2227
1122.63	92.6142
1124.56	91.9157
1126.49	91.2994
1128.42	90.9357
1130.35	91.0118
1132.28	91.4801
1134.21	92.3054
1136.14	93.2447
1138.07	94.0873
1140	94.6032
1141.93	94.7857
1143.86	94.6888
1145.79	94.5093
1147.72	94.3149
1149.65	94.2436
1151.58	94.2938
1153.51	94.4501
1155.44	94.5237
1157.37	94.2588
1159.3	93.2048
1161.23	91.1144
1163.16	87.8233
1165.09	83.3049
1167.02	77.6238
1168.95	71.621
1170.88	66.7879
1172.81	64.4529
1174.74	64.8066
1176.67	66.8791
1178.6	68.9211
1180.53	69.7503
1182.46	69.3697
1184.39	68.1226
1186.32	65.3323
1188.25	59.5498
1190.18	50.1052
1192.11	39.0566
1194.04	29.9612
1195.96	24.805
1197.89	23.3861
1199.82	24.764
1201.75	27.9665
1203.68	32.0761
1205.61	36.1995
1207.54	39.797
1209.47	42.7924
1211.4	45.2907
1213.33	47.1788
1215.26	48.453
1217.19	49.4777
1219.12	50.9655
1221.05	53.5504
1222.98	57.5713
1224.91	62.818
1226.84	68.7376
1228.77	74.5572
1230.7	79.6553
1232.63	83.7544
1234.56	86.9652
1236.49	89.2751
1238.42	90.7862
1240.35	91.7366
1242.28	92.4354
1244.21	93.0495
1246.14	93.7162
1248.07	94.2255
1250	94.5313
1251.93	94.7846
1253.86	95.0562
1255.79	95.169
1257.72	95.1204
1259.65	94.8814
1261.58	94.5041
1263.51	93.814
1265.44	92.5868
1267.37	90.7388
1269.3	88.5284
1271.23	86.2777
1273.16	84.4608
1275.09	83.4469
1277.02	83.5712
1278.95	84.8474
1280.88	86.9257
1282.81	89.1434
1284.74	91.0487
1286.67	92.4119
1288.6	93.3091
1290.53	93.88
1292.46	94.3477
1294.39	94.7407
1296.32	95.0791
1298.25	95.3291
1300.18	95.5349
1302.11	95.6639
1304.04	95.7091
1305.96	95.4845
1307.89	94.9587
1309.82	94.1933
1311.75	93.368
1313.68	92.6044
1315.61	92.0504
1317.54	91.691
1319.47	91.6071
1321.4	91.8427
1323.33	92.4287
1325.26	93.2271
1327.19	94.1109
1329.12	94.8271
1331.05	95.2835
1332.98	95.5549
1334.91	95.7879
1336.84	95.8767
1338.77	95.7622
1340.7	95.4132
1342.63	94.9465
1344.56	94.3614
1346.49	93.6495
1348.42	92.7439
1350.35	91.6451
1352.28	90.187
1354.21	88.1722
1356.14	85.3678
1358.07	81.9104
1360	78.2936
1361.93	75.263
1363.86	73.52
1365.79	73.5898
1367.72	75.5139
1369.65	78.9326
1371.58	82.982
1373.51	86.7311
1375.44	89.5326
1377.37	91.2811
1379.3	92.109
1381.23	92.2368
1383.16	91.741
1385.09	90.6009
1387.02	88.5348
1388.95	85.5035
1390.88	81.8173
1392.81	77.9449
1394.74	74.4912
1396.67	72.4122
1398.6	72.0048
1400.53	72.2795
1402.46	71.4461
1404.39	68.6476
1406.32	65.3313
1408.25	64.2274
1410.18	66.5585
1412.11	71.1135
1414.04	75.3179
1415.96	77.4553
1417.89	77.4201
1419.82	76.1233
1421.75	74.6206
1423.68	73.4447
1425.61	72.1304
1427.54	69.7866
1429.47	65.3825
1431.4	58.504
1433.33	50.2558
1435.26	42.4633
1437.19	36.6895
1439.12	33.957
1441.05	33.8039
1442.98	34.3115
1444.91	33.4655
1446.84	31.0752
1448.77	28.8462
1450.7	28.4869
1452.63	30.401
1454.56	33.8865
1456.49	37.6278
1458.42	39.663
1460.35	38.1452
1462.28	33.2793
1464.21	26.8064
1466.14	21.1059
1468.07	17.7858
1470	17.1033
1471.93	19.3286
1473.86	25.101
1475.79	34.186
1477.72	44.9781
1479.65	55.3451
1481.58	63.7858
1483.51	70.0042
1485.44	74.2665
1487.37	76.9017
1489.3	78.1025
1491.23	77.9884
1493.16	77.0865
1495.09	76.0455
1497.02	75.6313
1498.95	76.403
1500.88	78.46
1502.81	81.3277
1504.74	84.4756
1506.67	87.4827
1508.6	89.9606
1510.53	91.6466
1512.46	92.7017
1514.39	93.3583
1516.32	93.7599
1518.25	93.928
1520.18	94.0417
1522.11	94.1274
1524.04	94.1736
1525.96	94.2425
1527.89	94.3643
1529.82	94.4903
1531.75	94.6516
1533.68	94.7404
1535.61	94.822
1537.54	94.9992
1539.47	95.1691
1541.4	95.1332
1543.33	95.047
1545.26	95.0063
1547.19	95.0202
1549.12	95.1108
1551.05	95.3321
1552.98	95.5766
1554.91	95.7985
1556.84	96.0105
1558.77	96.0567
1560.7	95.7756
1562.63	95.5677
1564.56	95.5952
1566.49	95.6313
1568.42	95.5609
1570.35	95.422
1572.28	95.2271
1574.21	95.0737
1576.14	94.8198
1578.07	94.4533
1580	94.1439
1581.93	93.8834
1583.86	93.4242
1585.79	92.7481
1587.72	91.9828
1589.65	91.2615
1591.58	90.5547
1593.51	89.8086
1595.44	88.8081
1597.37	87.3077
1599.3	85.2311
1601.23	82.9896
1603.16	81.3746
1605.09	81.1039
1607.02	82.059
1608.95	83.3651
1610.88	84.0794
1612.81	83.9526
1614.74	83.1038
1616.67	81.5852
1618.6	79.7179
1620.53	78.1738
1622.46	77.2973
1624.39	77.3268
1626.32	78.4232
1628.25	80.4709
1630.18	83.0072
1632.11	85.5432
1634.04	87.8117
1635.96	89.7065
1637.89	91.107
1639.82	92.1633
1641.75	93.0727
1643.68	93.8989
1645.61	94.5194
1647.54	94.8733
1649.47	95.1175
1651.4	95.4761
1653.33	95.7129
1655.26	95.68
1657.19	95.5875
1659.12	95.5726
1661.05	95.5787
1662.98	95.58
1664.91	95.5493
1666.84	95.6462
1668.77	95.8284
1670.7	95.8884
1672.63	95.8378
1674.56	95.8026
1676.49	95.6906
1678.42	95.587
1680.35	95.6229
1682.28	95.7899
1684.21	95.8856
1686.14	95.7777
1688.07	95.6311
1690	95.632
1691.93	95.7005
1693.86	95.8203
1695.79	95.8342
1697.72	95.7904
1699.65	95.8444
1701.58	95.8351
1703.51	95.7115
1705.44	95.6808
1707.37	95.6843
1709.3	95.7019
1711.23	95.7985
1713.16	96.019
1715.09	96.2485
1717.02	96.352
1718.95	96.3239
1720.88	96.3542
1722.81	96.5087
1724.74	96.7007
1726.67	96.8515
1728.6	96.9987
1730.53	97.1575
1732.46	97.3206
1734.39	97.2474
1736.32	96.8923
1738.25	96.532
1740.18	96.3264
1742.11	96.1809
1744.04	96.0372
1745.96	95.8828
1747.89	95.7884
1749.82	95.6758
1751.75	95.4843
1753.68	95.3338
1755.61	95.3132
1757.54	95.2842
1759.47	95.2661
1761.4	95.2939
1763.33	95.3177
1765.26	95.3691
1767.19	95.4881
1769.12	95.5897
1771.05	95.6753
1772.98	95.6547
1774.91	95.5256
1776.84	95.4412
1778.77	95.4726
1780.7	95.492
1782.63	95.4759
1784.56	95.502
1786.49	95.5866
1788.42	95.6461
1790.35	95.696
1792.28	95.6945
1794.21	95.6535
1796.14	95.6776
1798.07	95.803
1800	95.8955
1801.93	95.9194
1803.86	95.9394
1805.79	95.9879
1807.72	95.9825
1809.65	95.9357
1811.58	95.9089
1813.51	95.9265
1815.44	95.932
1817.37	95.9253
1819.3	95.893
1821.23	95.8896
1823.16	95.9604
1825.09	96.0083
1827.02	95.95
1828.95	95.9243
1830.88	95.9481
1832.81	95.9585
1834.74	95.9412
1836.67	95.9568
1838.6	96.0116
1840.53	96.0412
1842.46	95.9778
1844.39	95.8618
1846.32	95.7539
1848.25	95.7409
1850.18	95.8002
1852.11	95.8496
1854.04	95.8163
1855.96	95.7688
1857.89	95.7675
1859.82	95.7746
1861.75	95.7579
1863.68	95.788
1865.61	95.843
1867.54	95.8739
1869.47	95.8803
1871.4	95.9083
1873.33	95.943
1875.26	96.0032
1877.19	96.0623
1879.12	96.0607
1881.05	96.0156
1882.98	96.0331
1884.91	96.1128
1886.84	96.2268
1888.77	96.3441
1890.7	96.4302
1892.63	96.4524
1894.56	96.4612
1896.49	96.4528
1898.42	96.4314
1900.35	96.465
1902.28	96.5831
1904.21	96.6755
1906.14	96.7087
1908.07	96.7091
1910	96.694
1911.93	96.6663
1913.86	96.6972
1915.79	96.7843
1917.72	96.7823
1919.65	96.6275
1921.58	96.5093
1923.51	96.4662
1925.44	96.4003
1927.37	96.2974
1929.3	96.2069
1931.23	96.1406
1933.16	96.0737
1935.09	95.9412
1937.02	95.8139
1938.95	95.7815
1940.88	95.829
1942.81	95.8834
1944.74	95.9361
1946.67	95.9742
1948.6	95.9943
1950.53	96.017
1952.46	96.0867
1954.39	96.1889
1956.32	96.3062
1958.25	96.3635
1960.18	96.3167
1962.11	96.2354
1964.04	96.2082
1965.96	96.2078
1967.89	96.2036
1969.82	96.1699
1971.75	96.1307
1973.68	96.1183
1975.61	96.1166
1977.54	96.0976
1979.47	96.1424
1981.4	96.2541
1983.33	96.3275
1985.26	96.3168
1987.19	96.2887
1989.12	96.2816
1991.05	96.3232
1992.98	96.3863
1994.91	96.4077
1996.84	96.3634
1998.77	96.3306
2000.7	96.3106
2002.63	96.2079
2004.56	96.0531
2006.49	96.0185
2008.42	96.0893
2010.35	96.1776
2012.28	96.2376
2014.21	96.2281
2016.14	96.1928
2018.07	96.2358
2020	96.3195
2021.93	96.3779
2023.86	96.4015
2025.79	96.4051
2027.72	96.3798
2029.65	96.3535
2031.58	96.3569
2033.51	96.3767
2035.44	96.3676
2037.37	96.3529
2039.3	96.3222
2041.23	96.2752
2043.16	96.2751
2045.09	96.3423
2047.02	96.3863
2048.95	96.3496
2050.88	96.2891
2052.81	96.3139
2054.74	96.3829
2056.67	96.3999
2058.6	96.3579
2060.53	96.2934
2062.46	96.2489
2064.39	96.2858
2066.32	96.3211
2068.25	96.2951
2070.18	96.3176
2072.11	96.4341
2074.04	96.4757
2075.96	96.3678
2077.89	96.2382
2079.82	96.2135
2081.75	96.2787
2083.68	96.3673
2085.61	96.4449
2087.54	96.5136
2089.47	96.5433
2091.4	96.551
2093.33	96.5688
2095.26	96.5859
2097.19	96.5561
2099.12	96.4876
2101.05	96.4427
2102.98	96.4642
2104.91	96.4678
2106.84	96.3934
2108.77	96.2984
2110.7	96.196
2112.63	96.1016
2114.56	96.1457
2116.49	96.2693
2118.42	96.293
2120.35	96.2123
2122.28	96.1861
2124.21	96.265
2126.14	96.2971
2128.07	96.2562
2130	96.3388
2131.93	96.5093
2133.86	96.5615
2135.79	96.5061
2137.72	96.5235
2139.65	96.6353
2141.58	96.6999
2143.51	96.6386
2145.44	96.5904
2147.37	96.7176
2149.3	96.9106
2151.23	96.9315
2153.16	96.7971
2155.09	96.6553
2157.02	96.5901
2158.95	96.6053
2160.88	96.6529
2162.81	96.6826
2164.74	96.7221
2166.67	96.8158
2168.6	96.8951
2170.53	96.8361
2172.46	96.7296
2174.39	96.766
2176.32	96.9258
2178.25	97.029
2180.18	96.9757
2182.11	96.7767
2184.04	96.6303
2185.96	96.7096
2187.89	96.7645
2189.82	96.5394
2191.75	96.3125
2193.68	96.3065
2195.61	96.3218
2197.54	96.1963
2199.47	96.0412
2201.4	95.9922
2203.33	96.0127
2205.26	95.9943
2207.19	95.9593
2209.12	95.9568
2211.05	96.0016
2212.98	96.1195
2214.91	96.2866
2216.84	96.4595
2218.77	96.6842
2220.7	96.8773
2222.63	96.8752
2224.56	96.8499
2226.49	97.0299
2228.42	97.1995
2230.35	97.1542
2232.28	97.0371
2234.21	97.0163
2236.14	97.1029
2238.07	97.2339
2240	97.2904
2241.93	97.2197
2243.86	97.142
2245.79	97.0796
2247.72	96.9109
2249.65	96.7443
2251.58	96.7194
2253.51	96.7953
2255.44	96.8667
2257.37	96.8008
2259.3	96.6249
2261.23	96.515
2263.16	96.467
2265.09	96.3876
2267.02	96.3219
2268.95	96.3403
2270.88	96.3692
2272.81	96.3729
2274.74	96.3946
2276.67	96.3901
2278.6	96.3823
2280.53	96.4756
2282.46	96.5877
2284.39	96.6175
2286.32	96.6046
2288.25	96.5981
2290.18	96.5962
2292.11	96.6002
2294.04	96.5838
2295.96	96.4995
2297.89	96.4563
2299.82	96.6009
2301.75	96.8165
2303.68	96.9732
2305.61	97.0412
2307.54	96.891
2309.47	96.5605
2311.4	96.3724
2313.33	96.4271
2315.26	96.5373
2317.19	96.6335
2319.12	96.7502
2321.05	96.7956
2322.98	96.7242
2324.91	96.6308
2326.84	96.5995
2328.77	96.6394
2330.7	96.6794
2332.63	96.7319
2334.56	96.868
2336.49	96.967
2338.42	96.9711
2340.35	96.9374
2342.28	96.8537
2344.21	96.8286
2346.14	96.9065
2348.07	96.8653
2350	96.6914
2351.93	96.5898
2353.86	96.597
2355.79	96.6609
2357.72	96.6632
2359.65	96.4958
2361.58	96.4017
2363.51	96.5185
2365.44	96.5047
2367.37	96.3029
2369.3	96.2516
2371.23	96.2946
2373.16	96.2026
2375.09	96.1546
2377.02	96.3317
2378.95	96.5713
2380.88	96.6959
2382.81	96.6678
2384.74	96.618
2386.67	96.6698
2388.6	96.6967
2390.53	96.6624
2392.46	96.688
2394.39	96.7171
2396.32	96.67
2398.25	96.5933
2400.18	96.516
2402.11	96.4255
2404.04	96.3693
2405.96	96.3665
2407.89	96.3518
2409.82	96.3903
2411.75	96.6012
2413.68	96.8102
2415.61	96.8243
2417.54	96.7819
2419.47	96.7132
2421.4	96.5108
2423.33	96.3971
2425.26	96.5031
2427.19	96.6008
2429.12	96.5855
2431.05	96.5032
2432.98	96.3939
2434.91	96.2849
2436.84	96.1782
2438.77	96.1727
2440.7	96.2255
2442.63	96.1458
2444.56	96.0558
2446.49	96.1063
2448.42	96.2046
2450.35	96.3362
2452.28	96.4568
2454.21	96.4425
2456.14	96.3103
2458.07	96.1361
2460	96.0387
2461.93	96.1068
2463.86	96.2494
2465.79	96.3342
2467.72	96.2996
2469.65	96.2276
2471.58	96.3369
2473.51	96.6009
2475.44	96.6341
2477.37	96.347
2479.3	96.1455
2481.23	96.2437
2483.16	96.4718
2485.09	96.6166
2487.02	96.5764
2488.95	96.3657
2490.88	96.0903
2492.81	95.9284
2494.74	95.9789
2496.67	96.1462
2498.6	96.2256
2500.53	96.1545
2502.46	96.1656
2504.39	96.3574
2506.32	96.4956
2508.25	96.5027
2510.18	96.5041
2512.11	96.4706
2514.04	96.3858
2515.96	96.3723
2517.89	96.4622
2519.82	96.6376
2521.75	96.8303
2523.68	96.8539
2525.61	96.6693
2527.54	96.521
2529.47	96.6061
2531.4	96.7477
2533.33	96.7569
2535.26	96.7753
2537.19	96.8899
2539.12	96.9254
2541.05	96.7828
2542.98	96.6483
2544.91	96.708
2546.84	96.7861
2548.77	96.6155
2550.7	96.3518
2552.63	96.2366
2554.56	96.1447
2556.49	96.0274
2558.42	96.0125
2560.35	96.0601
2562.28	96.1137
2564.21	96.224
2566.14	96.3493
2568.07	96.3683
2570	96.3555
2571.93	96.4641
2573.86	96.6007
2575.79	96.6366
2577.72	96.659
2579.65	96.7789
2581.58	96.843
2583.51	96.7288
2585.44	96.684
2587.37	96.8414
2589.3	96.9486
2591.23	96.8413
2593.16	96.6456
2595.09	96.5768
2597.02	96.6565
2598.95	96.6915
2600.88	96.7218
2602.81	96.8709
2604.74	96.8646
2606.67	96.6541
2608.6	96.6006
2610.53	96.7745
2612.46	96.969
2614.39	97.0551
2616.32	97.0678
2618.25	97.0909
2620.18	97.1109
2622.11	97.1497
2624.04	97.2689
2625.96	97.3911
2627.89	97.4171
2629.82	97.3644
2631.75	97.1716
2633.68	96.8883
2635.61	96.8174
2637.54	96.9972
2639.47	97.1431
2641.4	97.0526
2643.33	96.7551
2645.26	96.5107
2647.19	96.4427
2649.12	96.3865
2651.05	96.2949
2652.98	96.3616
2654.91	96.5777
2656.84	96.7065
2658.77	96.7061
2660.7	96.565
2662.63	96.267
2664.56	96.0807
2666.49	96.1273
2668.42	96.3106
2670.35	96.6253
2672.28	96.9071
2674.21	96.9494
2676.14	96.8793
2678.07	96.8535
2680	96.871
2681.93	96.9177
2683.86	96.9817
2685.79	97.0778
2687.72	97.2222
2689.65	97.3007
2691.58	97.2458
2693.51	97.2225
2695.44	97.3325
2697.37	97.3974
2699.3	97.2924
2701.23	97.1058
2703.16	96.9769
2705.09	97.0073
2707.02	97.1969
2708.95	97.3537
2710.88	97.3412
2712.81	97.3541
2714.74	97.5731
2716.67	97.7729
2718.6	97.7455
2720.53	97.6238
2722.46	97.5703
2724.39	97.6045
2726.32	97.587
2728.25	97.4031
2730.18	97.3144
2732.11	97.3872
2734.04	97.2477
2735.96	96.8785
2737.89	96.644
2739.82	96.7736
2741.75	97.1665
2743.68	97.3626
2745.61	97.1151
2747.54	96.7684
2749.47	96.6686
2751.4	96.7163
2753.33	96.7866
2755.26	96.8999
2757.19	96.9955
2759.12	96.997
2761.05	96.9358
2762.98	96.7545
2764.91	96.3285
2766.84	95.9144
2768.77	95.8368
2770.7	95.8696
2772.63	95.7998
2774.56	95.6316
2776.49	95.3419
2778.42	95.187
2780.35	95.3628
2782.28	95.5214
2784.21	95.3844
2786.14	95.0958
2788.07	94.8734
2790	94.788
2791.93	94.7615
2793.86	94.7228
2795.79	94.8289
2797.72	95.1437
2799.65	95.2876
2801.58	95.0328
2803.51	94.7677
2805.44	94.7748
2807.37	94.9297
2809.3	94.913
2811.23	94.4004
2813.16	93.615
2815.09	93.0827
2817.02	92.764
2818.95	92.358
2820.88	91.8172
2822.81	91.1365
2824.74	90.3797
2826.67	89.7472
2828.6	89.1074
2830.53	88.3082
2832.46	87.6659
2834.39	87.2375
2836.32	86.5851
2838.25	85.8163
2840.18	85.5312
2842.11	85.6055
2844.04	85.3424
2845.96	84.7701
2847.89	84.3682
2849.82	84.1689
2851.75	84.0594
2853.68	84.0902
2855.61	84.1472
2857.54	84.0372
2859.47	83.9853
2861.4	84.0506
2863.33	83.5756
2865.26	82.6263
2867.19	82.1019
2869.12	82.1614
2871.05	82.2032
2872.98	81.9698
2874.91	81.8226
2876.84	81.8314
2878.77	81.5816
2880.7	80.9388
2882.63	80.1055
2884.56	79.2916
2886.49	78.4532
2888.42	77.5958
2890.35	76.9225
2892.28	76.3822
2894.21	75.8481
2896.14	75.3859
2898.07	75.1046
2900	75.1298
2901.93	75.2086
2903.86	74.8854
2905.79	74.2964
2907.72	74.0116
2909.65	74.2674
2911.58	74.7646
2913.51	75.1325
2915.44	75.2097
2917.37	74.8063
2919.3	73.9308
2921.23	72.9817
2923.16	72.1365
2925.09	70.944
2927.02	69.3404
2928.95	68.0832
2930.88	67.5141
2932.81	67.4792
2934.74	68.083
2936.67	69.1348
2938.6	70.1161
2940.53	71.1651
2942.46	72.7536
2944.39	74.5217
2946.32	75.7354
2948.25	76.3338
2950.18	76.4665
2952.11	76.1008
2954.04	75.576
2955.96	75.1825
2957.89	74.6535
2959.82	73.8394
2961.75	73.2576
2963.68	73.5463
2965.61	74.6541
2967.54	75.9263
2969.47	77.0832
2971.4	78.3221
2973.33	79.5065
2975.26	80.3482
2977.19	81.1069
2979.12	82.1027
2981.05	83.0645
2982.98	83.525
2984.91	83.5552
2986.84	83.5023
2988.77	83.3922
2990.7	82.9874
2992.63	82.4454
2994.56	82.4199
2996.49	82.9301
2998.42	83.2945
3000.35	83.3575
3002.28	83.3624
3004.21	83.5917
3006.14	84.3672
3008.07	85.5071
3010	86.4319
3011.93	87.1828
3013.86	88.0454
3015.79	88.8589
3017.72	89.8406
3019.65	91.0876
3021.58	91.922
3023.51	92.4376
3025.44	93.0419
3027.37	93.4673
3029.3	93.8157
3031.23	94.3028
3033.16	94.5074
3035.09	94.3765
3037.02	94.5244
3038.95	94.9674
3040.88	95.0949
3042.81	95.0193
3044.74	95.4291
3046.67	96.3567
3048.6	96.7742
3050.53	96.2414
3052.46	95.7344
3054.39	95.7403
3056.32	95.8239
3058.25	95.6914
3060.18	95.4446
3062.11	95.5872
3064.04	96.0822
3065.96	96.4313
3067.89	96.6916
3069.82	96.8152
3071.75	96.4283
3073.68	95.7745
3075.61	95.5332
3077.54	95.7583
3079.47	95.5744
3081.4	94.6291
3083.33	93.7783
3085.26	93.6993
3087.19	93.978
3089.12	94.1851
3091.05	94.4652
3092.98	94.5482
3094.91	94.1888
3096.84	93.9128
3098.77	93.9056
3100.7	93.882
3102.63	93.7408
3104.56	93.5867
3106.49	93.6013
3108.42	93.771
3110.35	93.9926
3112.28	94.534
3114.21	95.3832
3116.14	96.0899
3118.07	96.4924
3120	96.4221
3121.93	95.8958
3123.86	95.7629
3125.79	96.2473
3127.72	96.4025
3129.65	96.0864
3131.58	96.0998
3133.51	96.433
3135.44	96.519
3137.37	96.161
3139.3	95.6166
3141.23	95.433
3143.16	95.9469
3145.09	96.6831
3147.02	96.9062
3148.95	96.7845
3150.88	97.0302
3152.81	97.6099
3154.74	97.8813
3156.67	97.6335
3158.6	97.3756
3160.53	97.3533
3162.46	97.2434
3164.39	97.0564
3166.32	97.167
3168.25	97.4721
3170.18	97.5031
3172.11	97.2559
3174.04	97.2393
3175.96	97.306
3177.89	96.9771
3179.82	96.87
3181.75	97.2153
3183.68	96.9014
3185.61	96.2072
3187.54	96.2231
3189.47	96.547
3191.4	96.6512
3193.33	96.6113
3195.26	96.5627
3197.19	96.7261
3199.12	96.9318
3201.05	96.8905
3202.98	96.4437
3204.91	95.7527
3206.84	95.5778
3208.77	96.0714
3210.7	96.4562
3212.63	96.6466
3214.56	96.8368
3216.49	96.5746
3218.42	96.055
3220.35	96.1087
3222.28	96.5182
3224.21	96.6091
3226.14	96.6598
3228.07	96.9473
3230	96.8803
3231.93	96.6103
3233.86	96.9894
3235.79	97.6553
3237.72	97.9955
3239.65	98.1798
3241.58	97.8987
3243.51	97.212
3245.44	96.8668
3247.37	96.9372
3249.3	96.9791
3251.23	96.5959
3253.16	96.0644
3255.09	95.8198
3257.02	95.5559
3258.95	95.2526
3260.88	95.2222
3262.81	95.5345
3264.74	96.0435
3266.67	96.4326
3268.6	96.3989
3270.53	96.0978
3272.46	96.1796
3274.39	96.6469
3276.32	97.0662
3278.25	97.3912
3280.18	97.1944
3282.11	96.4509
3284.04	96.07
3285.96	96.2348
3287.89	95.9228
3289.82	95.1584
3291.75	95.1782
3293.68	95.5078
3295.61	95.3305
3297.54	95.6747
3299.47	96.6721
3301.4	97.3387
3303.33	97.5726
3305.26	97.4675
3307.19	96.8193
3309.12	95.8843
3311.05	95.4225
3312.98	95.7921
3314.91	96.5576
3316.84	97.2192
3318.77	97.4095
3320.7	97.1922
3322.63	97.0791
3324.56	96.8676
3326.49	96.208
3328.42	95.9889
3330.35	96.7305
3332.28	97.4816
3334.21	97.4321
3336.14	96.7825
3338.07	96.3026
3340	96.3429
3341.93	96.0984
3343.86	95.3475
3345.79	95.1312
3347.72	95.5343
3349.65	95.7141
3351.58	95.8581
3353.51	96.4421
3355.44	97.1573
3357.37	97.6476
3359.3	97.7761
3361.23	97.5064
3363.16	96.7953
3365.09	95.7294
3367.02	95.1277
3368.95	95.4207
3370.88	95.7433
3372.81	95.2192
3374.74	94.573
3376.67	95.3242
3378.6	96.8077
3380.53	96.8387
3382.46	95.5664
3384.39	94.9139
3386.32	95.6322
3388.25	96.7058
3390.18	96.7543
3392.11	95.7614
3394.04	95.1576
3395.96	95.4989
3397.89	95.632
3399.82	95.2385
3401.75	95.0115
3403.68	95.0771
3405.61	95.6222
3407.54	96.2472
3409.47	96.0495
3411.4	95.6315
3413.33	95.7954
3415.26	96.0621
3417.19	96.2987
3419.12	96.7141
3421.05	96.8539
3422.98	96.6802
3424.91	96.7184
3426.84	96.6063
3428.77	95.8653
3430.7	95.1308
3432.63	95.0972
3434.56	95.5613
3436.49	95.71
3438.42	95.5174
3440.35	95.8837
3442.28	96.6606
3444.21	97.119
3446.14	97.1588
3448.07	96.9597
3450	96.8159
3451.93	96.6211
3453.86	96.2471
3455.79	96.0511
3457.72	96.1447
3459.65	96.4945
3461.58	96.9519
3463.51	97.2509
3465.44	97.5958
3467.37	98.0263
3469.3	97.8214
3471.23	96.9584
3473.16	96.5199
3475.09	96.6195
3477.02	96.4903
3478.95	96.3393
3480.88	96.4651
3482.81	96.5677
3484.74	96.5532
3486.67	96.1839
3488.6	95.5394
3490.53	95.527
3492.46	96.1928
3494.39	96.5247
3496.32	96.2331
3498.25	95.813
3500.18	95.624
3502.11	95.8505
3504.04	96.2755
3505.96	96.2029
3507.89	95.5041
3509.82	94.8952
3511.75	94.6559
3513.68	94.65
3515.61	95.1362
3517.54	95.9975
3519.47	96.5194
3521.4	96.3853
3523.33	95.9734
3525.26	96.0376
3527.19	96.7433
3529.12	97.637
3531.05	98.5219
3532.98	98.8025
3534.91	98.1185
3536.84	97.4382
3538.77	97.1155
3540.7	96.828
3542.63	96.921
3544.56	97.1615
3546.49	96.8867
3548.42	96.5353
3550.35	96.544
3552.28	96.4031
3554.21	96.1884
3556.14	96.4229
3558.07	96.5614
3560	96.2568
3561.93	95.9754
3563.86	95.6172
3565.79	94.9683
3567.72	94.4116
3569.65	94.5342
3571.58	95.3989
3573.51	96.5463
3575.44	97.5289
3577.37	97.4574
3579.3	96.3633
3581.23	95.7966
3583.16	96.0751
3585.09	96.4763
3587.02	96.4476
3588.95	95.8751
3590.88	95.6567
3592.81	95.7656
3594.74	95.2137
3596.67	94.4995
3598.6	94.6802
3600.53	95.5925
3602.46	96.3301
3604.39	96.8766
3606.32	97.7062
3608.25	98.1087
3610.18	97.368
3612.11	96.0963
3614.04	95.3879
3615.96	95.7107
3617.89	95.9194
3619.82	95.3883
3621.75	95.6226
3623.68	96.7933
3625.61	97.1961
3627.54	96.0525
3629.47	94.532
3631.4	94.8292
3633.33	96.7238
3635.26	98.0722
3637.19	98.492
3639.12	98.4244
3641.05	98.0952
3642.98	97.7449
3644.91	97.3236
3646.84	96.9931
3648.77	96.3297
3650.7	95.2053
3652.63	95.0132
3654.56	95.7748
3656.49	96.1118
3658.42	96.5658
3660.35	97.8025
3662.28	98.8882
3664.21	99.2975
3666.14	99.2823
3668.07	98.7669
3670	97.3785
3671.93	96.3099
3673.86	96.5685
3675.79	96.4678
3677.72	96.0421
3679.65	96.7196
3681.58	97.4537
3683.51	97.7266
3685.44	98.038
3687.37	97.4643
3689.3	95.9762
3691.23	95.4834
3693.16	96.473
3695.09	97.5555
3697.02	98.4632
3698.95	99.23
3700.88	98.9959
3702.81	98.1295
3704.74	97.7452
3706.67	97.7242
3708.6	97.5639
3710.53	97.128
3712.46	96.8568
3714.39	97.5752
3716.32	98.8227
3718.25	99.3651
3720.18	99.0664
3722.11	98.4865
3724.04	98.435
3725.96	98.8637
3727.89	98.8649
3729.82	98.4057
3731.75	98.0477
3733.68	97.7947
3735.61	97.197
3737.54	96.4561
3739.47	96.6472
3741.4	97.512
3743.33	97.1217
3745.26	95.6351
3747.19	95.39
3749.12	95.9423
3751.05	95.5036
3752.98	94.7942
3754.91	94.9692
3756.84	96.0041
3758.77	97.3453
3760.7	98.3951
3762.63	98.7452
3764.56	98.212
3766.49	97.5617
3768.42	97.3133
3770.35	97.3732
3772.28	98.0893
3774.21	98.8185
3776.14	98.4472
3778.07	97.7254
3780	97.3073
3781.93	97.042
3783.86	97.1474
3785.79	97.2306
3787.72	96.8319
3789.65	96.5528
3791.58	96.7524
3793.51	97.25
3795.44	97.3574
3797.37	96.6275
3799.3	95.8875
3801.23	95.5189
3803.16	95.2998
3805.09	95.7631
3807.02	96.4281
3808.95	96.3399
3810.88	96.1468
3812.81	96.6577
3814.74	97.3683
3816.67	97.5828
3818.6	97.3134
3820.53	96.6156
3822.46	95.8722
3824.39	96.1083
3826.32	96.8439
3828.25	96.9614
3830.18	96.7954
3832.11	96.6724
3834.04	96.3622
3835.96	95.9894
3837.89	95.7058
3839.82	95.9247
3841.75	96.4693
3843.68	96.2217
3845.61	95.566
3847.54	95.9762
3849.47	97.3725
3851.4	98.1337
3853.33	96.4598
3855.26	94.2318
3857.19	94.8004
3859.12	96.8662
3861.05	97.6274
3862.98	97.3128
3864.91	96.9042
3866.84	96.4605
3868.77	95.7653
3870.7	95.514
3872.63	96.0082
3874.56	96.3831
3876.49	96.6731
3878.42	97.2668
3880.35	97.1432
3882.28	96.3366
3884.21	96.1246
3886.14	96.4913
3888.07	97.1578
3890	97.967
3891.93	98.0589
3893.86	97.7409
3895.79	97.7962
3897.72	97.9292
3899.65	97.5184
3901.58	96.7243
3903.51	96.3549
3905.44	96.673
3907.37	97.3815
3909.3	98.2392
3911.23	98.4055
3913.16	97.6961
3915.09	97.0813
3917.02	96.9963
3918.95	97.1032
3920.88	97.1377
3922.81	97.0677
3924.74	97.1436
3926.67	97.3125
3928.6	97.3243
3930.53	97.2125
3932.46	97.276
3934.39	97.5072
3936.32	97.6212
3938.25	97.6351
3940.18	97.7107
3942.11	97.5228
3944.04	97.2656
3945.96	97.2841
3947.89	97.1341
3949.82	96.9123
3951.75	97.3693
3953.68	97.8573
3955.61	97.5506
3957.54	97.316
3959.47	97.9059
3961.4	98.3151
3963.33	98.3136
3965.26	98.6941
3967.19	98.7115
3969.12	98.0727
3971.05	98.3159
3972.98	98.9255
3974.91	98.3378
3976.84	97.4729
3978.77	97.419
3980.7	97.5538
3982.63	97.6674
3984.56	97.6924
3986.49	97.5086
3988.42	97.7463
3990.35	98.725
3992.28	99.2608
3994.21	98.5522
3996.14	97.4608
3998.07	96.8938
4000	97.5194
